# Supplementary material for: Gene Expression Analysis of Induced Plum Pox Virus Resistance in Peach (Prunus Persica) by Almond (P. Dulcis) Grafting
Source: Research Square preprint supplement (doi:10.21203/rs.3.rs-145720/v1), 2021-01-18
Supplement: Supplementary file 1 [file 5a70c7ee79d5d71c0f72fb15.xlsx]

## Sheet: Table S8
Gene expression analysis of induced Plum pox virus resistance in peach (Prunus persica) by almond (P. dulcis) grafting
Manuel Rubio, Pedro J. Martínez-García, Azam Nikbakht-Dehkordi, Ángela S. Prudencio, Eva M. Gómez, Bernardo Rodamilans, Federico Dicenta, Juan Antonio García and Pedro Martínez-Gómez

## Sheet: Tested genes comparison G vs F
gene_id	gene	locus	sample_1	sample_2	status	value_1	value_2	log2.fold_change.	test_stat	FDR_GF	p_value	q_value	significant	gene description
XLOC_000720	Prupe.1G131500	Pp01:10331517-10332665	G	F	OK	6.67576	14.898	1.15811	-3.86299	0.532	5e-05	0.37616	no	NA
XLOC_020741	Prupe.6G283700	Pp06:26383839-26386074	G	F	OK	124.936	391.929	1.6494	-6.21702	0.532	5e-05	0.37616	no	ATFER2 (ferritin 2); binding / ferric iron binding / oxidoreductase/ transition metal ion binding
XLOC_007590	Prupe.2G005500	Pp02:533323-539881	G	F	OK	67.986	33.4523	-1.02313	3.97764	0.532	0.0001	0.37616	no	LOX2 (LIPOXYGENASE 2); lipoxygenase
XLOC_023896	Prupe.8G011000	Pp08:895261-898388	G	F	OK	8.2502	17.8254	1.11143	-3.90396	0.532	0.0001	0.37616	no	oxidoreductase, 2OG-Fe(II) oxygenase family protein
XLOC_024797	Prupe.8G187600	Pp08:18428943-18432284	G	F	OK	0.311332	1.30771	2.07052	-4.84396	0.532	0.0001	0.37616	no	NA
XLOC_012186	Prupe.3G308000	Pp03:26844246-26845675	G	F	OK	3.91682	8.8867	1.18197	-3.7452	0.665	0.00015	0.4702	no	unknown protein
XLOC_013986	Prupe.4G045400	Pp04:2169178-2170060	G	F	OK	0.283906	0	-Inf	NA	1	0.0005	0.999263	no	NA
XLOC_001690	Prupe.1G327400	Pp01:31106247-31107078	G	F	OK	19.2816	8.66617	-1.15376	3.62666	1	0.00055	0.999263	no	MLP31 (MLP-LIKE PROTEIN 31)
XLOC_014386	Prupe.4G131900	Pp04:7300875-7303554	G	F	OK	2.67285	1.00118	-1.41668	3.76175	1	0.00055	0.999263	no	L-ascorbate oxidase, putative
XLOC_007588	Prupe.2G005300	Pp02:508223-518559	G	F	OK	89.7396	46.7746	-0.940019	3.49282	1	0.00065	0.999263	no	LOX2 (LIPOXYGENASE 2); lipoxygenase
XLOC_014051	Prupe.4G059600	Pp04:2843789-2845326	G	F	OK	2.80135	6.34274	1.17898	-3.53059	1	0.00085	0.999263	no	cysteine proteinase, putative
XLOC_001997	Prupe.1G385000	Pp01:34519424-34524217	G	F	OK	4.68899	2.39459	-0.969499	3.39097	1	0.0011	0.999263	no	NA
XLOC_013891	Prupe.4G024500	Pp04:1157497-1160945	G	F	OK	14.4046	7.5519	-0.93162	3.34677	1	0.0012	0.999263	no	GPT2; antiporter/ glucose-6-phosphate transmembrane transporter
XLOC_015864	Prupe.5G145400	Pp05:13368419-13375260	G	F	OK	3.91929	2.10732	-0.895183	3.20292	1	0.0013	0.999263	no	ATP binding / DNA binding
XLOC_002599	Prupe.1G498800	Pp01:41308013-41308708	G	F	OK	30.341	55.688	0.876099	-3.20311	1	0.00135	0.999263	no	NA
XLOC_005072	Prupe.1G433900	Pp01:37106586-37108098	G	F	OK	0.205743	0	-Inf	NA	1	0.0014	0.999263	no	NA
XLOC_003221	Prupe.1G038100	Pp01:2674980-2676583	G	F	OK	1.5358	0.444419	-1.78899	3.62721	1	0.0015	0.999263	no	NA
XLOC_013482	Prupe.4G234800	Pp04:15159384-15160512	G	F	OK	0	0.272031	Inf	NA	1	0.0016	0.999263	no	heavy-metal-associated domain-containing protein
XLOC_022886	Prupe.7G067100	Pp07:10506361-10508481	G	F	OK	12.6348	6.77568	-0.898966	3.23663	1	0.00175	0.999263	no	ACX1 (ACYL-COA OXIDASE 1); acyl-CoA oxidase
XLOC_001734	Prupe.1G334500	Pp01:31616734-31621759	G	F	OK	1.35552	0.615468	-1.1391	3.09827	1	0.0018	0.999263	no	RDR1 (RNA-DEPENDENT RNA POLYMERASE 1); RNA-directed RNA polymerase/ nucleic acid binding
XLOC_002596	Prupe.1G498400	Pp01:41296716-41297197	G	F	OK	17.2414	34.9743	1.02042	-3.19929	1	0.0018	0.999263	no	NA
XLOC_008164	Prupe.2G129300	Pp02:18646897-18647717	G	F	OK	0.218882	0	-Inf	NA	1	0.00205	0.999263	no	ERF13 (ETHYLENE-RESPONSIVE ELEMENT BINDING FACTOR 13); DNA binding / transcription factor
XLOC_022612	Prupe.7G007100	Pp07:923817-925278	G	F	OK	2.30123	0	-Inf	NA	1	0.00205	0.999263	no	NA
XLOC_022560	Prupe.7G265400	Pp07:21900269-21905474	G	F	OK	11.6056	6.54683	-0.825949	3.13254	1	0.0021	0.999263	no	IRX3 (IRREGULAR XYLEM 3); cellulose synthase
XLOC_012532	Prupe.4G060800	Pp04:2894701-2896660	G	F	OK	19.3024	34.7901	0.849895	-3.02265	1	0.0022	0.999263	no	copper-binding family protein
XLOC_004206	Prupe.1G241500	Pp01:25553607-25557282	G	F	OK	20.3567	11.6248	-0.808305	3.10969	1	0.00225	0.999263	no	unknown protein
XLOC_018203	Prupe.6G135600	Pp06:10787433-10792516	G	F	OK	4.57139	2.23958	-1.02941	3.1017	1	0.00225	0.999263	no	NA
XLOC_018574	Prupe.6G210900	Pp06:21930950-21936474	G	F	OK	78.0668	45.1757	-0.789164	3.08165	1	0.00235	0.999263	no	PCK1 (PHOSPHOENOLPYRUVATE CARBOXYKINASE 1); ATP binding / phosphoenolpyruvate carboxykinase (ATP)/ phosphoenolpyruvate carboxykinase/ purine nucleotide binding
XLOC_000668	Prupe.1G123100	Pp01:9651235-9655816	G	F	OK	3.48373	1.75145	-0.992081	3.08189	1	0.0024	0.999263	no	BXL1 (BETA-XYLOSIDASE 1); hydrolase, hydrolyzing O-glycosyl compounds
XLOC_013437	Prupe.4G225800	Pp04:14248687-14249838	G	F	OK	513.181	295.607	-0.795785	3.01054	1	0.00255	0.999263	no	NA
XLOC_001423	Prupe.1G275300	Pp01:28105859-28107602	G	F	OK	2.07002	0.58224	-1.82996	3.53324	1	0.00275	0.999263	no	RNS1 (RIBONUCLEASE 1); endoribonuclease/ ribonuclease
XLOC_015590	Prupe.5G093500	Pp05:10358295-10359909	G	F	OK	21.955	11.3298	-0.954431	2.97423	1	0.0028	0.999263	no	ATOSM34 (osmotin 34)
XLOC_003730	Prupe.1G149400	Pp01:11710973-11713998	G	F	OK	48.9599	83.5957	0.771827	-3.01157	1	0.003	0.999263	no	dienelactone hydrolase family protein
XLOC_015117	Prupe.5G005000	Pp05:609147-611053	G	F	OK	13.1233	23.4025	0.834532	-3.01116	1	0.00315	0.999263	no	cinnamoyl-CoA reductase family
XLOC_023960	Prupe.8G024800	Pp08:2253079-2255075	G	F	OK	7.59704	3.58752	-1.08245	2.91142	1	0.0034	0.999263	no	NA
XLOC_026110	Prupe.8G186300	Pp08:18384201-18385023	G	F	OK	0	0.2073	Inf	NA	1	0.0034	0.999263	no	leucine-rich repeat family protein / protein kinase family protein
XLOC_013253	Prupe.4G194100	Pp04:11704059-11707409	G	F	OK	14.0114	8.10701	-0.789362	2.85175	1	0.0035	0.999263	no	NA
XLOC_003315	Prupe.1G061300	Pp01:4332352-4334170	G	F	OK	1.62767	0.637879	-1.35145	3.09149	1	0.00355	0.999263	no	NCED6 (NINE-CIS-EPOXYCAROTENOID DIOXYGENASE 6); 9-cis-epoxycarotenoid dioxygenase
XLOC_002462	Prupe.1G472800	Pp01:39309084-39312785	G	F	OK	37.416	22.1493	-0.756397	2.90551	1	0.00355	0.999263	no	FUNCTIONS IN: molecular_function unknown; INVOLVED IN: biological_process unknown; LOCATED IN: cell wall, plant-type cell wall; EXPRESSED IN: 23 plant structures; EXPRESSED DURING: 13 growth stages; CONTAINS InterPro DOMAIN/s: Protein of unknown function DUF642 (InterPro:IPR006946), Galactose-binding like (InterPro:IPR008979); BEST Arabidopsis thaliana protein match is: unknown protein (TAIR:AT5G…
XLOC_002062	Prupe.1G398100	Pp01:35243496-35245491	G	F	OK	12.7285	7.14537	-0.832982	2.96608	1	0.0036	0.999263	no	chloroplast nucleoid DNA-binding protein, putative
XLOC_026584	Prupe.I005700	scaffold_71:11-1373	G	F	OK	14.0146	7.17494	-0.965897	2.93129	1	0.0036	0.999263	no	TT4 (TRANSPARENT TESTA 4); naringenin-chalcone synthase
XLOC_019514	Prupe.6G027900	Pp06:2169152-2175925	G	F	OK	0.43707	0.971817	1.15282	-2.40098	1	0.0037	0.999263	no	NA
XLOC_016570	Prupe.5G047300	Pp05:5024093-5026144	G	F	OK	1.13894	2.73938	1.26616	-2.96113	1	0.00375	0.999263	no	ATEXLB1 (ARABIDOPSIS THALIANA EXPANSIN-LIKE B1)
XLOC_021105	Prupe.6G353500	Pp06:30055886-30060498	G	F	OK	6.69458	3.67255	-0.866209	2.93607	1	0.0038	0.999263	no	unknown protein
XLOC_004011	Prupe.1G201900	Pp01:20010018-20020186	G	F	OK	10.3043	6.00237	-0.779647	2.80846	1	0.00405	0.999263	no	tRNA-splicing endonuclease positive effector-related
XLOC_024583	Prupe.8G143900	Pp08:16068148-16071623	G	F	OK	28.8673	17.2813	-0.740222	2.87899	1	0.00425	0.999263	no	glycosyl hydrolase family 3 protein
XLOC_018156	Prupe.6G126700	Pp06:9767154-9769884	G	F	OK	0.192698	0.818684	2.08697	-3.29421	1	0.00435	0.999263	no	CER4 (ECERIFERUM 4); fatty acyl-CoA reductase (alcohol-forming)/ oxidoreductase, acting on the CH-CH group of donors
XLOC_024798	Prupe.8G187700	Pp08:18434020-18437986	G	F	OK	0.407828	2.29505	2.49249	-3.84922	1	0.00435	0.999263	no	NA
XLOC_004012	Prupe.1G202100	Pp01:20038556-20043500	G	F	OK	4.27825	2.36272	-0.856569	2.91555	1	0.00445	0.999263	no	tRNA-splicing endonuclease positive effector-related
XLOC_021816	Prupe.7G123700	Pp07:14597421-14604503	G	F	OK	1.98759	1.08274	-0.876332	2.77027	1	0.00475	0.999263	no	LOCATED IN: vacuole; EXPRESSED IN: 23 plant structures; EXPRESSED DURING: 13 growth stages; BEST Arabidopsis thaliana protein match is: F-box family protein (TAIR:AT1G22000.1); Has 67094 Blast hits to 30189 proteins in 1408 species: Archae - 880; Bacteria - 6261; Metazoa - 35085; Fungi - 5326; Plants - 2622; Viruses - 293; Other Eukaryotes - 16627 (source: NCBI BLink).
XLOC_018236	Prupe.6G141100	Pp06:11424761-11425857	G	F	OK	104	171.746	0.723696	-2.82285	1	0.00485	0.999263	no	PR4 (PATHOGENESIS-RELATED 4); chitin binding
XLOC_007488	Prupe.2G316100	Pp02:29670561-29672236	G	F	OK	23.9475	40.4746	0.757141	-2.77242	1	0.0049	0.999263	no	CB5-E (CYTOCHROME B5 ISOFORM E); heme binding
XLOC_014005	Prupe.4G049500	Pp04:2366719-2374724	G	F	OK	13.0544	7.99573	-0.707232	2.73951	1	0.00495	0.999263	no	NA
XLOC_018097	Prupe.6G115400	Pp06:8373709-8380884	G	F	OK	22.7395	13.7051	-0.730486	2.7435	1	0.005	0.999263	no	AGO5 (ARGONAUTE 5); nucleic acid binding
XLOC_021739	Prupe.7G107900	Pp07:13610589-13613813	G	F	OK	9.59244	5.67254	-0.757902	2.7609	1	0.0051	0.999263	no	NA
XLOC_008529	Prupe.2G209600	Pp02:24246805-24246991	G	F	OK	7.00719	0	-Inf	NA	1	0.00525	0.999263	no	ROT4 (ROTUNDIFOLIA4)
XLOC_014649	Prupe.4G191300	Pp04:11505161-11506010	G	F	OK	114.022	187.647	0.718699	-2.80777	1	0.00555	0.999263	no	dynein light chain, putative
XLOC_024945	Prupe.8G216900	Pp08:19844257-19849000	G	F	OK	14.0691	8.45728	-0.734267	2.81915	1	0.00555	0.999263	no	CESA4 (CELLULOSE SYNTHASE A4); cellulose synthase/ transferase, transferring glycosyl groups
XLOC_015596	Prupe.5G094200	Pp05:10404525-10405456	G	F	OK	28.1326	46.8964	0.737232	-2.75071	1	0.0057	0.999263	no	ATOSM34 (osmotin 34)
XLOC_009613	Prupe.3G102900	Pp03:8052835-8054071	G	F	OK	7.93862	3.47848	-1.19043	2.87533	1	0.0058	0.999263	no	NA
XLOC_002110	Prupe.1G405900	Pp01:35672738-35675685	G	F	OK	12.7638	21.8832	0.777765	-2.783	1	0.0059	0.999263	no	ACL5 (ACAULIS 5); spermine synthase/ thermospermine synthase
XLOC_003928	Prupe.1G189800	Pp01:17535856-17539150	G	F	OK	22.1018	36.1437	0.709576	-2.70728	1	0.00595	0.999263	no	unknown protein
XLOC_017154	Prupe.5G174200	Pp05:14846793-14848535	G	F	OK	1.20483	2.82299	1.22839	-2.83404	1	0.0061	0.999263	no	ATMYB66 (MYB DOMAIN PROTEIN 66); DNA binding / protein binding / transcription factor/ transcription regulator
XLOC_011522	Prupe.3G162200	Pp03:18116164-18120346	G	F	OK	1.59054	0.802035	-0.987784	2.79606	1	0.0065	0.999263	no	SWAP (Suppressor-of-White-APricot)/surp domain-containing protein / ubiquitin family protein
XLOC_001775	Prupe.1G342300	Pp01:32140306-32150987	G	F	OK	0.639858	0.320371	-0.998007	2.80945	1	0.0068	0.999263	no	NA
XLOC_017537	Prupe.6G002600	Pp06:313395-319829	G	F	OK	1.08179	0.514029	-1.07351	2.66291	1	0.00685	0.999263	no	APUM12 (ARABIDOPSIS PUMILIO 12); RNA binding / binding
XLOC_003535	Prupe.1G106900	Pp01:8577606-8585227	G	F	OK	14.3228	8.89621	-0.687048	2.64334	1	0.00695	0.999263	no	PDR9 (PLEIOTROPIC DRUG RESISTANCE 9); ATPase, coupled to transmembrane movement of substances
XLOC_006042	Prupe.2G046000	Pp02:5254013-5257565	G	F	OK	14.0867	8.66769	-0.700614	2.69105	1	0.0072	0.999263	no	disease resistance protein (NBS-LRR class), putative
XLOC_007656	Prupe.2G017500	Pp02:1627851-1635512	G	F	OK	0.98801	0.499517	-0.983991	2.64981	1	0.00755	0.999263	no	TOPII (TOPOISOMERASE II); ATP binding / DNA binding / DNA topoisomerase (ATP-hydrolyzing)/ DNA topoisomerase/ DNA-dependent ATPase
XLOC_011914	Prupe.3G248600	Pp03:23905961-23907898	G	F	OK	99.024	61.8377	-0.679291	2.65687	1	0.0076	0.999263	no	pollen Ole e 1 allergen and extensin family protein
XLOC_015865	Prupe.5G145600	Pp05:13378961-13386044	G	F	OK	5.23933	3.15226	-0.732998	2.69536	1	0.0077	0.999263	no	ATP binding / DNA binding
XLOC_006090	Prupe.2G052900	Pp02:6128239-6130878	G	F	OK	1.42117	0.518723	-1.45404	2.87537	1	0.00775	0.999263	no	UBP12 (UBIQUITIN-SPECIFIC PROTEASE 12); ubiquitin thiolesterase/ ubiquitin-specific protease
XLOC_013255	Prupe.4G194300	Pp04:11769338-11772113	G	F	OK	92.6419	57.9997	-0.67562	2.64095	1	0.0081	0.999263	no	NA
XLOC_015814	Prupe.5G136100	Pp05:12894263-12901201	G	F	OK	5.2357	3.11931	-0.747153	2.71643	1	0.0084	0.999263	no	NA
XLOC_017957	Prupe.6G089100	Pp06:6099692-6103928	G	F	OK	22.3176	13.8827	-0.684895	2.62044	1	0.0084	0.999263	no	LAC17 (laccase 17); laccase
XLOC_002595	Prupe.1G498300	Pp01:41277476-41277948	G	F	OK	268.913	430.98	0.68048	-2.65954	1	0.00845	0.999263	no	NA
XLOC_007753	Prupe.2G038200	Pp02:4111350-4114862	G	F	OK	0.208486	0.772059	1.88876	-3.07001	1	0.00855	0.999263	no	NQR (NADPH:QUINONE OXIDOREDUCTASE); FMN reductase
XLOC_020027	Prupe.6G134900	Pp06:10706304-10710577	G	F	OK	14.6207	8.91546	-0.713634	2.61331	1	0.009	0.999263	no	BGLU15 (BETA GLUCOSIDASE 15); catalytic/ cation binding / hydrolase, hydrolyzing O-glycosyl compounds
XLOC_003071	Prupe.1G002900	Pp01:312660-314932	G	F	OK	19.6295	12.1193	-0.695716	2.55511	1	0.00905	0.999263	no	TT4 (TRANSPARENT TESTA 4); naringenin-chalcone synthase
XLOC_019712	Prupe.6G069200	Pp06:4747959-4749977	G	F	OK	0.644221	1.78418	1.46963	-2.9126	1	0.00905	0.999263	no	tropinone reductase, putative / tropine dehydrogenase, putative
XLOC_001346	Prupe.1G261200	Pp01:27012797-27013269	G	F	OK	0.362319	0	-Inf	NA	1	0.0092	0.999263	no	NA
XLOC_023126	Prupe.7G119300	Pp07:14334634-14335102	G	F	OK	0.36786	0	-Inf	NA	1	0.0092	0.999263	no	unknown protein
XLOC_024270	Prupe.8G081800	Pp08:11485960-11486206	G	F	OK	1.78386	0	-Inf	NA	1	0.0092	0.999263	no	auxin-responsive protein, putative
XLOC_026210	Prupe.8G205900	Pp08:19269028-19269274	G	F	OK	1.78386	0	-Inf	NA	1	0.0092	0.999263	no	NA
XLOC_010246	Prupe.3G223500	Pp03:22350765-22352989	G	F	OK	4.69553	8.18231	0.801222	-2.56736	1	0.00925	0.999263	no	NA
XLOC_006014	Prupe.2G039900	Pp02:4346884-4348939	G	F	OK	11.143	6.67687	-0.738893	2.62572	1	0.00935	0.999263	no	dynamin family protein
XLOC_022540	Prupe.7G261200	Pp07:21706919-21708287	G	F	OK	0.366543	1.46736	2.00117	-3.1789	1	0.00955	0.999263	no	NA
XLOC_014674	Prupe.4G201700	Pp04:12526903-12531900	G	F	OK	6.82625	4.09215	-0.738233	2.55794	1	0.0099	0.999263	no	GAUT12 (GALACTURONOSYLTRANSFERASE 12); polygalacturonate 4-alpha-galacturonosyltransferase/ transferase, transferring glycosyl groups / transferase, transferring hexosyl groups
XLOC_008880	Prupe.2G287500	Pp02:28315090-28320984	G	F	OK	33.7487	21.1916	-0.671342	2.58742	1	0.0108	0.999263	no	NA
XLOC_014174	Prupe.4G089200	Pp04:4416784-4435201	G	F	OK	8.77604	5.66386	-0.631784	2.42697	1	0.0108	0.999263	no	AIR9; protein binding
XLOC_016735	Prupe.5G086700	Pp05:9816075-9818049	G	F	OK	38.9315	24.6295	-0.66055	2.50106	1	0.01085	0.999263	no	LDOX (LEUCOANTHOCYANIDIN DIOXYGENASE); leucocyanidin oxygenase
XLOC_026166	Prupe.8G196900	Pp08:18829144-18831138	G	F	OK	0.621768	0.139132	-2.15992	3.2607	1	0.01085	0.999263	no	CYP82G1; electron carrier/ heme binding / iron ion binding / monooxygenase/ oxygen binding
XLOC_000697	Prupe.1G127300	Pp01:9985572-9986467	G	F	OK	4.33735	8.36088	0.946843	-2.60176	1	0.011	0.999263	no	MLP423 (MLP-LIKE PROTEIN 423)
XLOC_007061	Prupe.2G234300	Pp02:25687530-25689579	G	F	OK	2.20283	1.01627	-1.11608	2.69166	1	0.01105	0.999263	no	HSP70 (heat shock protein 70); ATP binding
XLOC_016327	Prupe.5G241700	Pp05:18195910-18200676	G	F	OK	3.54982	2.05833	-0.786275	2.57228	1	0.01115	0.999263	no	SUS6 (SUCROSE SYNTHASE 6); UDP-glycosyltransferase/ sucrose synthase
XLOC_025829	Prupe.8G131400	Pp08:15380770-15382485	G	F	OK	25.6722	16.0499	-0.677641	2.55819	1	0.01115	0.999263	no	leucine-rich repeat family protein
XLOC_008879	Prupe.2G287400	Pp02:28308283-28311682	G	F	OK	55.7574	36.1397	-0.625579	2.44342	1	0.01165	0.999263	no	unknown protein
XLOC_025542	Prupe.8G068200	Pp08:10058813-10059841	G	F	OK	2.37997	0.960518	-1.30906	2.74363	1	0.01175	0.999263	no	NA
XLOC_004014	Prupe.1G202500	Pp01:20052786-20060757	G	F	OK	1.15297	0.493934	-1.22297	2.60467	1	0.0118	0.999263	no	tRNA-splicing endonuclease positive effector-related
XLOC_009706	Prupe.3G120400	Pp03:10625434-10627412	G	F	OK	3.01965	1.48391	-1.02498	2.65579	1	0.0119	0.999263	no	NA
XLOC_013053	Prupe.4G160700	Pp04:9219605-9223388	G	F	OK	0.324006	0.854385	1.39886	-2.64836	1	0.0121	0.999263	no	embryo-abundant protein-related
XLOC_026495	Prupe.8G265600	Pp08:22230892-22237963	G	F	OK	3.73885	2.28398	-0.711044	2.42879	1	0.01215	0.999263	no	ATP binding / microtubule motor
XLOC_022539	Prupe.7G261100	Pp07:21701384-21704006	G	F	OK	0.0626103	0.677435	3.43561	-4.12676	1	0.0122	0.999263	no	NA
XLOC_004019	Prupe.1G203800	Pp01:20333799-20334637	G	F	OK	48.2655	29.8443	-0.693538	2.57488	1	0.0123	0.999263	no	NA
XLOC_023069	Prupe.7G107800	Pp07:13607528-13609563	G	F	OK	19.0282	11.9884	-0.666507	2.49864	1	0.01245	0.999263	no	HSP70 (heat shock protein 70); ATP binding
XLOC_004647	Prupe.1G336800	Pp01:31768539-31769893	G	F	OK	8.2066	4.64329	-0.821638	2.46594	1	0.0126	0.999263	no	LOCATED IN: endomembrane system, integral to membrane; EXPRESSED IN: 16 plant structures; EXPRESSED DURING: 7 growth stages; CONTAINS InterPro DOMAIN/s: Cytochrome b561, eukaryote (InterPro:IPR004877), Cytochrome b561/ferric reductase transmembrane (InterPro:IPR006593); BEST Arabidopsis thaliana protein match is: ACYB-1; carbon-monoxide oxygenase (TAIR:AT5G38630.1); Has 447 Blast hits to 446 prot…
XLOC_006060	Prupe.2G048200	Pp02:5556342-5568700	G	F	OK	3.50967	2.11219	-0.732599	2.45987	1	0.0127	0.999263	no	unknown protein
XLOC_011364	Prupe.3G129200	Pp03:13047766-13049483	G	F	OK	3.19192	1.5339	-1.05722	2.59676	1	0.01275	0.999263	no	NA
XLOC_008487	Prupe.2G202000	Pp02:23841598-23845657	G	F	OK	0.675559	0.300717	-1.16768	2.43691	1	0.01285	0.999263	no	no apical meristem (NAM) family protein
XLOC_006673	Prupe.2G160800	Pp02:21253883-21256148	G	F	OK	3.43692	1.83158	-0.908025	2.45953	1	0.0129	0.999263	no	NA
XLOC_005218	Prupe.1G464400	Pp01:38747940-38748449	G	F	OK	0.936502	3.81418	2.02602	-2.97182	1	0.01295	0.999263	no	AP2 domain-containing transcription factor, putative
XLOC_015841	Prupe.5G140900	Pp05:13125562-13131423	G	F	OK	1.05698	0.49952	-1.08133	2.50334	1	0.01295	0.999263	no	VIM1 (VARIANT IN METHYLATION 1); DNA binding / chromatin binding / double-stranded methylated DNA binding / histone binding / methyl-CpG binding / methyl-CpNpG binding / methyl-CpNpN binding / ubiquitin-protein ligase
XLOC_020618	Prupe.6G258300	Pp06:25023269-25024440	G	F	OK	26.8203	42.5295	0.665137	-2.51369	1	0.01305	0.999263	no	unknown protein
XLOC_010750	Prupe.3G000600	Pp03:78304-79916	G	F	OK	38.1277	24.5861	-0.632999	2.42913	1	0.0133	0.999263	no	GLP10 (GERMIN-LIKE PROTEIN 10); manganese ion binding / nutrient reservoir
XLOC_014556	Prupe.4G165500	Pp04:9611236-9612755	G	F	OK	0.350192	1.01062	1.52902	-2.78155	1	0.0133	0.999263	no	curculin-like (mannose-binding) lectin family protein
XLOC_010414	Prupe.3G253900	Pp03:24314920-24317206	G	F	OK	11.7173	7.31901	-0.67892	2.47788	1	0.01335	0.999263	no	transferase family protein
XLOC_010047	Prupe.3G189300	Pp03:20242122-20243957	G	F	OK	2.01686	3.73011	0.88711	-2.53504	1	0.0134	0.999263	no	NA
XLOC_025685	Prupe.8G096300	Pp08:12843212-12844387	G	F	OK	18.663	30.3798	0.702935	-2.488	1	0.0136	0.999263	no	MEE3 (MATERNAL EFFECT EMBRYO ARREST 3); DNA binding / transcription factor
XLOC_000102	Prupe.1G019400	Pp01:1356003-1365231	G	F	OK	6.22856	3.97288	-0.648711	2.47694	1	0.01385	0.999263	no	kinase interacting family protein
XLOC_003072	Prupe.1G003000	Pp01:319776-321560	G	F	OK	18.6642	11.6946	-0.674428	2.47547	1	0.01405	0.999263	no	TT4 (TRANSPARENT TESTA 4); naringenin-chalcone synthase
XLOC_003963	Prupe.1G195500	Pp01:18517850-18519750	G	F	OK	0	0.2843	Inf	NA	1	0.01415	0.999263	no	NA
XLOC_016901	Prupe.5G119400	Pp05:11987317-11987683	G	F	OK	0	0.512524	Inf	NA	1	0.01415	0.999263	no	lipid binding
XLOC_021636	Prupe.7G090100	Pp07:12369777-12370613	G	F	OK	0	0.20704	Inf	NA	1	0.01415	0.999263	no	NA
XLOC_025580	Prupe.8G077400	Pp08:11151372-11151966	G	F	OK	0	0.627839	Inf	NA	1	0.01415	0.999263	no	NA
XLOC_024848	Prupe.8G198000	Pp08:18879925-18881688	G	F	OK	0	0.431832	Inf	NA	1	0.01415	0.999263	no	NA
XLOC_026578	Prupe.I005100	scaffold_51:5912-7546	G	F	OK	0	0.261833	Inf	NA	1	0.01415	0.999263	no	NA
XLOC_012236	Prupe.4G005100	Pp04:307540-309009	G	F	OK	42.4277	27.2555	-0.638461	2.44619	1	0.0142	0.999263	no	metal ion binding
XLOC_014002	Prupe.4G048800	Pp04:2329994-2331290	G	F	OK	37.253	23.6158	-0.657605	2.48342	1	0.01425	0.999263	no	NA
XLOC_003644	Prupe.1G132100	Pp01:10397046-10399533	G	F	OK	0.916992	0.36824	-1.31626	2.67725	1	0.0143	0.999263	no	RDR1 (RNA-DEPENDENT RNA POLYMERASE 1); RNA-directed RNA polymerase/ nucleic acid binding
XLOC_024527	Prupe.8G131100	Pp08:15362331-15363638	G	F	OK	4.14291	2.17509	-0.929568	2.53637	1	0.01455	0.999263	no	unknown protein
XLOC_005404	Prupe.1G502300	Pp01:41551820-41553302	G	F	OK	1.04828	0.313073	-1.74345	2.82407	1	0.0147	0.999263	no	FLS (FLAVONOL SYNTHASE); flavonol synthase
XLOC_020088	Prupe.6G149100	Pp06:12636901-12638694	G	F	OK	1.40592	0.584692	-1.26576	2.6116	1	0.0147	0.999263	no	hydrolase
XLOC_025179	Prupe.8G263100	Pp08:22134877-22136011	G	F	OK	94.8763	146.66	0.628356	-2.45792	1	0.0154	0.999263	no	SAG21 (SENESCENCE-ASSOCIATED GENE 21)
XLOC_011913	Prupe.3G248400	Pp03:23864692-23887399	G	F	OK	19.9902	12.798	-0.643379	2.39339	1	0.01555	0.999263	no	BIG (BIG); binding / ubiquitin-protein ligase/ zinc ion binding
XLOC_017819	Prupe.6G060300	Pp06:4185525-4186229	G	F	OK	533.441	835.212	0.646814	-2.4286	1	0.01555	0.999263	no	unknown protein
XLOC_008016	Prupe.2G097300	Pp02:15238431-15240793	G	F	OK	17.756	29.2236	0.718825	-2.33742	1	0.0157	0.999263	no	unknown protein
XLOC_023743	Prupe.7G252800	Pp07:21319141-21332373	G	F	OK	4.06867	2.57283	-0.661201	2.35135	1	0.01605	0.999263	no	DCL4 (DICER-LIKE 4); RNA binding / protein binding / ribonuclease III
XLOC_024330	Prupe.8G096500	Pp08:12874695-12881987	G	F	OK	1.95408	1.13189	-0.78776	2.3749	1	0.01615	0.999263	no	leucine-rich repeat transmembrane protein kinase, putative
XLOC_014820	Prupe.4G233100	Pp04:14992714-14996093	G	F	OK	6.41129	4.02973	-0.66993	2.36431	1	0.0163	0.999263	no	AtRLP6 (Receptor Like Protein 6); protein binding
XLOC_017106	Prupe.5G163800	Pp05:14294373-14296467	G	F	OK	0.511489	0.131186	-1.96309	2.92575	1	0.0163	0.999263	no	CYP71A26; electron carrier/ heme binding / iron ion binding / monooxygenase/ oxygen binding
XLOC_015394	Prupe.5G057300	Pp05:6234081-6235284	G	F	OK	1.92445	4.50703	1.22773	-2.51578	1	0.01635	0.999263	no	NA
XLOC_012751	Prupe.4G104000	Pp04:5332735-5334966	G	F	OK	1.30106	0.612887	-1.086	2.44032	1	0.0165	0.999263	no	PLP6 (PATATIN-LIKE PROTEIN 6); nutrient reservoir
XLOC_013242	Prupe.4G193000	Pp04:11627417-11632557	G	F	OK	9.80279	15.1016	0.623435	-2.34627	1	0.0166	0.999263	no	ATCSLG1; cellulose synthase/ transferase/ transferase, transferring glycosyl groups
XLOC_011766	Prupe.3G215300	Pp03:21820437-21822032	G	F	OK	4.03874	7.09589	0.813078	-2.43385	1	0.01665	0.999263	no	FUNCTIONS IN: molecular_function unknown; INVOLVED IN: intracellular protein transport; LOCATED IN: endoplasmic reticulum, plasma membrane; EXPRESSED IN: 26 plant structures; EXPRESSED DURING: 13 growth stages; CONTAINS InterPro DOMAIN/s: B-cell receptor-associated 31-like (InterPro:IPR008417); BEST Arabidopsis thaliana protein match is: unknown protein (TAIR:AT1G11905.1); Has 311 Blast hits to 2…
XLOC_010885	Prupe.3G025400	Pp03:1851036-1855921	G	F	OK	2.08089	1.15652	-0.847408	2.39507	1	0.01685	0.999263	no	protein kinase family protein
XLOC_003524	Prupe.1G103900	Pp01:8291708-8307331	G	F	OK	1.78915	1.05916	-0.756356	2.29213	1	0.01695	0.999263	no	PGP11 (P-GLYCOPROTEIN 11); ATPase, coupled to transmembrane movement of substances
XLOC_013983	Prupe.4G044700	Pp04:2143980-2145845	G	F	OK	9.69871	15.6673	0.69189	-2.39854	1	0.01695	0.999263	no	FUNCTIONS IN: molecular_function unknown; INVOLVED IN: biological_process unknown; LOCATED IN: endomembrane system, integral to membrane; EXPRESSED IN: 23 plant structures; EXPRESSED DURING: 15 growth stages; CONTAINS InterPro DOMAIN/s: Tetraspanin (InterPro:IPR018499); BEST Arabidopsis thaliana protein match is: unknown protein (TAIR:AT2G20230.1); Has 91 Blast hits to 91 proteins in 11 species: …
XLOC_005350	Prupe.1G491100	Pp01:40850364-40852855	G	F	OK	1.19895	0.546563	-1.13331	2.47464	1	0.0171	0.999263	no	AAP3; amino acid transmembrane transporter
XLOC_023250	Prupe.7G145300	Pp07:15884649-15885135	G	F	OK	36.8939	59.5022	0.68956	-2.39318	1	0.0171	0.999263	no	YCF37 (Arabidopsis homolog of Synechocystis YCF37)
XLOC_006100	Prupe.2G054000	Pp02:6311429-6313309	G	F	OK	6.61895	3.96042	-0.74095	2.40033	1	0.0173	0.999263	no	NA
XLOC_023585	Prupe.7G221300	Pp07:19784392-19787370	G	F	OK	0.679496	0.288654	-1.23512	2.56011	1	0.0173	0.999263	no	NA
XLOC_023734	Prupe.7G250800	Pp07:21198147-21201726	G	F	OK	6.05396	3.72157	-0.701969	2.35688	1	0.0174	0.999263	no	AVP1; ATPase/ hydrogen-translocating pyrophosphatase
XLOC_001832	Prupe.1G353300	Pp01:32866855-32870293	G	F	OK	2.4303	1.39442	-0.80147	2.39865	1	0.01745	0.999263	no	ABC transporter family protein
XLOC_018696	Prupe.6G231800	Pp06:23443063-23449536	G	F	OK	3.99783	2.46212	-0.699316	2.37077	1	0.0176	0.999263	no	transport protein-related
XLOC_003137	Prupe.1G017300	Pp01:1190762-1196662	G	F	OK	6.43721	4.11611	-0.645154	2.31923	1	0.01775	0.999263	no	SDE3 (SILENCING DEFECTIVE); RNA helicase
XLOC_000528	Prupe.1G094600	Pp01:7362087-7365378	G	F	OK	0.58505	1.16592	0.994834	-2.45402	1	0.0178	0.999263	no	NA
XLOC_003630	Prupe.1G128400	Pp01:10034945-10036913	G	F	OK	10.1739	17.0011	0.740748	-2.34506	1	0.01785	0.999263	no	MLP423 (MLP-LIKE PROTEIN 423)
XLOC_019670	Prupe.6G061300	Pp06:4257732-4261724	G	F	OK	6.08113	3.73461	-0.70338	2.3518	1	0.018	0.999263	no	IRX12 (IRREGULAR XYLEM 12); laccase
XLOC_022727	Prupe.7G029600	Pp07:5477978-5478647	G	F	OK	354.085	233.529	-0.600495	2.3491	1	0.01805	0.999263	no	NA
XLOC_000872	Prupe.1G160700	Pp01:12820786-12821181	G	F	OK	0.407095	0	-Inf	NA	1	0.01845	0.999263	no	NA
XLOC_005108	Prupe.1G441900	Pp01:37505919-37506294	G	F	OK	0.454072	0	-Inf	NA	1	0.01845	0.999263	no	unknown protein
XLOC_010173	Prupe.3G209800	Pp03:21543541-21544381	G	F	OK	0.417943	0	-Inf	NA	1	0.01845	0.999263	no	unknown protein
XLOC_025383	Prupe.8G033700	Pp08:3124060-3124321	G	F	OK	1.17243	0	-Inf	NA	1	0.01845	0.999263	no	unknown protein
XLOC_021731	Prupe.7G106100	Pp07:13502533-13506026	G	F	OK	0.499394	0.090945	-2.45711	3.19569	1	0.01875	0.999263	no	BGLU16 (BETA GLUCOSIDASE 16); catalytic/ cation binding / hydrolase, hydrolyzing O-glycosyl compounds
XLOC_019799	Prupe.6G085600	Pp06:5761518-5764400	G	F	OK	24.5296	37.0493	0.59492	-2.30532	1	0.0189	0.999263	no	riboflavin biosynthesis protein, putative
XLOC_014074	Prupe.4G065700	Pp04:3144325-3150774	G	F	OK	10.2522	6.64944	-0.624633	2.32427	1	0.019	0.999263	no	IRX1 (IRREGULAR XYLEM 1); cellulose synthase/ transferase, transferring glycosyl groups
XLOC_001998	Prupe.1G385100,Prupe.1G385200,Prupe.1G385300	Pp01:34524363-34528592	G	F	OK	28.0481	15.7913	-0.828777	2.18757	1	0.0191	0.999263	no	NA
XLOC_019420	Prupe.6G013600	Pp06:950189-952287	G	F	OK	4.5104	7.39539	0.71337	-2.26624	1	0.01935	0.999263	no	peroxidase, putative
XLOC_002597	Prupe.1G498600	Pp01:41299370-41299843	G	F	OK	2.45452	5.73699	1.22485	-2.42168	1	0.01945	0.999263	no	NA
XLOC_017912	Prupe.6G081000	Pp06:5496117-5499844	G	F	OK	0.605874	1.1905	0.974483	-2.38995	1	0.01945	0.999263	no	unknown protein
XLOC_006823	Prupe.2G185700	Pp02:22691733-22695104	G	F	OK	6.83159	10.5238	0.623359	-2.31522	1	0.0197	0.999263	no	pentatricopeptide (PPR) repeat-containing protein
XLOC_017796	Prupe.6G054800	Pp06:3851580-3855948	G	F	OK	5.99377	3.72151	-0.687577	2.29622	1	0.01975	0.999263	no	ASN1 (GLUTAMINE-DEPENDENT ASPARAGINE SYNTHASE 1); asparagine synthase (glutamine-hydrolyzing)
XLOC_008274	Prupe.2G153900	Pp02:20801005-20803832	G	F	OK	3.46443	2.04275	-0.762108	2.31063	1	0.01985	0.999263	no	unknown protein
XLOC_018082	Prupe.6G112800	Pp06:8138076-8142339	G	F	OK	40.5486	61.5745	0.602681	-2.32963	1	0.01985	0.999263	no	CSD2 (COPPER/ZINC SUPEROXIDE DISMUTASE 2); superoxide dismutase
XLOC_009250	Prupe.3G035000	Pp03:2557788-2558556	G	F	OK	3.93008	7.30148	0.893632	-2.39365	1	0.02005	0.999263	no	auxin-responsive protein-related
XLOC_010045	Prupe.3G189100	Pp03:20230930-20238578	G	F	OK	2.34257	4.21938	0.848942	-2.33274	1	0.0201	0.999263	no	NA
XLOC_021742	Prupe.7G108200	Pp07:13672248-13675173	G	F	OK	2.28781	1.29975	-0.815728	2.33867	1	0.0203	0.999263	no	HSP70 (heat shock protein 70); ATP binding
XLOC_008780	Prupe.2G265400	Pp02:27228566-27229409	G	F	OK	13.1692	21.1231	0.681653	-2.31228	1	0.02035	0.999263	no	unknown protein
XLOC_020886	Prupe.6G313000	Pp06:28013639-28014936	G	F	OK	0.96619	1.99893	1.04885	-2.35908	1	0.0205	0.999263	no	NAS3 (NICOTIANAMINE SYNTHASE 3); nicotianamine synthase
XLOC_021582	Prupe.7G079100	Pp07:11479906-11482243	G	F	OK	0.607251	0.183893	-1.72343	2.64461	1	0.02055	0.999263	no	peroxidase, putative
XLOC_002038	Prupe.1G393100	Pp01:35002955-35004822	G	F	OK	0.440391	1.13976	1.37188	-2.49047	1	0.02095	0.999263	no	WRKY40; transcription factor
XLOC_004445	Prupe.1G292400	Pp01:29005540-29009588	G	F	OK	0.841355	1.51803	0.851412	-2.36571	1	0.021	0.999263	no	CYP72A9; electron carrier/ heme binding / iron ion binding / monooxygenase/ oxygen binding
XLOC_010524	Prupe.3G274500	Pp03:25356773-25359867	G	F	OK	0.319551	0.069876	-2.19318	2.89038	1	0.0213	0.999263	no	protein kinase, putative
XLOC_019241	Prupe.6G345300	Pp06:29637621-29638636	G	F	OK	124.335	187.632	0.593674	-2.31572	1	0.02135	0.999263	no	histone H1.2
XLOC_004496	Prupe.1G304700	Pp01:29836058-29840381	G	F	OK	0.357615	0.126238	-1.50226	2.52159	1	0.02155	0.999263	no	NA
XLOC_019883	Prupe.6G103900	Pp06:7292782-7297414	G	F	OK	2.77396	5.09014	0.875756	-2.3499	1	0.02175	0.999263	no	unknown protein
XLOC_025873	Prupe.8G139000	Pp08:15809391-15811274	G	F	OK	37.0835	24.3049	-0.609532	2.32257	1	0.0218	0.999263	no	NA
XLOC_022215	Prupe.7G197900	Pp07:18624842-18626937	G	F	OK	1.72843	0.889473	-0.958437	2.34035	1	0.022	0.999263	no	TT7 (TRANSPARENT TESTA 7); flavonoid 3'-monooxygenase/ oxygen binding
XLOC_019702	Prupe.6G067600	Pp06:4652705-4657147	G	F	OK	2.70849	1.62668	-0.735558	2.25067	1	0.02205	0.999263	no	subtilase family protein
XLOC_012117	Prupe.3G291300	Pp03:26108295-26125499	G	F	OK	5.20172	3.49475	-0.573801	2.1971	1	0.02215	0.999263	no	unknown protein
XLOC_004897	Prupe.1G391500	Pp01:34879927-34883456	G	F	OK	2.46776	1.31945	-0.90326	2.38808	1	0.0224	0.999263	no	transferase family protein
XLOC_002176	Prupe.1G416600	Pp01:36163718-36168449	G	F	OK	23.3964	15.7676	-0.569319	2.20864	1	0.0224	0.999263	no	RXF12; endo-1,4-beta-xylanase/ hydrolase, hydrolyzing O-glycosyl compounds
XLOC_013845	Prupe.4G015700	Pp04:733293-739073	G	F	OK	4.97611	3.16103	-0.654626	2.22635	1	0.02255	0.999263	no	SRF8 (STRUBBELIG-RECEPTOR FAMILY 8); ATP binding / kinase/ protein binding / protein kinase/ protein serine/threonine kinase/ protein tyrosine kinase
XLOC_016738	Prupe.5G087500	Pp05:9862428-9867768	G	F	OK	9.87179	15.5945	0.659659	-2.25829	1	0.02255	0.999263	no	NA
XLOC_008665	Prupe.2G239400	Pp02:25968619-25972276	G	F	OK	6.59578	4.18519	-0.65625	2.24535	1	0.02265	0.999263	no	fringe-related protein
XLOC_017769	Prupe.6G047900	Pp06:3439840-3441768	G	F	OK	4.88281	2.89878	-0.752263	2.26996	1	0.0227	0.999263	no	GDSL-motif lipase/hydrolase family protein
XLOC_000595	Prupe.1G110200	Pp01:8788600-8824275	G	F	OK	13.3088	8.94385	-0.573409	2.22153	1	0.02285	0.999263	no	phosphoinositide binding
XLOC_007469	Prupe.2G311700	Pp02:29460784-29473062	G	F	OK	14.386	9.64654	-0.57658	2.2267	1	0.0229	0.999263	no	GLT1; glutamate synthase (NADH)
XLOC_005850	Prupe.2G008700	Pp02:767236-769706	G	F	OK	0.264026	0.905123	1.77743	-2.64153	1	0.023	0.999263	no	elongation factor 1-beta, putative / EF-1-beta, putative
XLOC_025136	Prupe.8G254600	Pp08:21753950-21754722	G	F	OK	6.71854	3.64402	-0.882617	2.33106	1	0.02315	0.999263	no	glutaredoxin family protein
XLOC_018095	Prupe.6G115200	Pp06:8348657-8353014	G	F	OK	1.35581	0.59053	-1.19907	2.393	1	0.0236	0.999263	no	serine carboxypeptidase S28 family protein
XLOC_009153	Prupe.3G014100	Pp03:1010885-1015717	G	F	OK	5.93274	3.81509	-0.636981	2.23937	1	0.0241	0.999263	no	SUS6 (SUCROSE SYNTHASE 6); UDP-glycosyltransferase/ sucrose synthase
XLOC_004318	Prupe.1G266400	Pp01:27418070-27423437	G	F	OK	99.4746	66.0724	-0.59028	2.28155	1	0.0243	0.999263	no	proton-dependent oligopeptide transport (POT) family protein
XLOC_008818	Prupe.2G273500	Pp02:27630020-27632480	G	F	OK	2.61623	4.59362	0.812141	-2.30299	1	0.0244	0.999263	no	DER1 (DERLIN-1)
XLOC_001596	Prupe.1G307700	Pp01:30015092-30016181	G	F	OK	1.19441	0.435236	-1.45643	2.46597	1	0.0245	0.999263	no	hydrolase
XLOC_025726	Prupe.8G106200	Pp08:13733544-13741578	G	F	OK	0.943563	0.549693	-0.779493	2.23901	1	0.02485	0.999263	no	tRNA-splicing endonuclease positive effector-related
XLOC_006814	Prupe.2G183900	Pp02:22569769-22571729	G	F	OK	5.92953	9.2942	0.648413	-2.22683	1	0.0249	0.999263	no	NA
XLOC_009612	Prupe.3G102800	Pp03:7997236-7998155	G	F	OK	2.41133	0.86565	-1.47797	2.41837	1	0.0249	0.999263	no	NA
XLOC_004082	Prupe.1G215900	Pp01:22884781-22895151	G	F	OK	8.88835	6.00484	-0.56579	2.19879	1	0.02495	0.999263	no	tRNA-splicing endonuclease positive effector-related
XLOC_025446	Prupe.8G046500	Pp08:4902815-4906846	G	F	OK	2.70849	1.64311	-0.721062	2.26813	1	0.025	0.999263	no	disease resistance protein (TIR-NBS-LRR class), putative
XLOC_014808	Prupe.4G230700	Pp04:14771367-14778129	G	F	OK	0.612591	0.289056	-1.08357	2.26254	1	0.02515	0.999263	no	leucine-rich repeat transmembrane protein kinase, putative
XLOC_019880	Prupe.6G103500	Pp06:7239181-7242308	G	F	OK	4.84541	2.91639	-0.732433	2.22874	1	0.0252	0.999263	no	LOCATED IN: membrane; CONTAINS InterPro DOMAIN/s: Protein of unknown function DUF250 (InterPro:IPR004853); BEST Arabidopsis thaliana protein match is: transporter-related (TAIR:AT1G06890.2); Has 1852 Blast hits to 1847 proteins in 207 species: Archae - 0; Bacteria - 58; Metazoa - 582; Fungi - 250; Plants - 685; Viruses - 0; Other Eukaryotes - 277 (source: NCBI BLink).
XLOC_016954	Prupe.5G132800	Pp05:12744232-12749648	G	F	OK	499.252	320.796	-0.638112	2.184	1	0.02525	0.999263	no	starch synthase, putative
XLOC_011145	Prupe.3G079700	Pp03:5886241-5887552	G	F	OK	0.354387	1.24939	1.81782	-2.5843	1	0.0254	0.999263	no	late embryogenesis abundant protein, putative / LEA protein, putative
XLOC_004659	Prupe.1G339700	Pp01:31979669-31980632	G	F	OK	35.6346	22.9883	-0.632377	2.24388	1	0.02545	0.999263	no	NA
XLOC_009618	Prupe.3G103500	Pp03:8139409-8146080	G	F	OK	1.07291	0.567888	-0.917853	2.28617	1	0.0256	0.999263	no	NA
XLOC_023594	Prupe.7G222700	Pp07:19859681-19860533	G	F	OK	9.91447	5.83743	-0.764202	2.2325	1	0.02575	0.999263	no	TINY2 (TINY2); DNA binding / transcription factor
XLOC_009194	Prupe.3G023800	Pp03:1750430-1765454	G	F	OK	5.75496	3.85656	-0.577491	2.1806	1	0.02585	0.999263	no	tRNA-splicing endonuclease positive effector-related
XLOC_020850	Prupe.6G305700	Pp06:27592587-27595550	G	F	OK	6.16018	3.89916	-0.659811	2.26869	1	0.0259	0.999263	no	glucan endo-1,3-beta-glucosidase-related
XLOC_002313	Prupe.1G442100	Pp01:37520422-37521625	G	F	OK	1.03828	0.385795	-1.42829	2.417	1	0.02595	0.999263	no	unknown protein
XLOC_014418	Prupe.4G140200	Pp04:7830215-7831392	G	F	OK	2.32974	1.16616	-0.998398	2.27161	1	0.026	0.999263	no	auxin-responsive protein-related
XLOC_016690	Prupe.5G074700	Pp05:8882638-8888257	G	F	OK	18.4166	12.4859	-0.560704	2.19223	1	0.0265	0.999263	no	disease resistance protein (TIR-NBS-LRR class), putative
XLOC_016768	Prupe.5G091700	Pp05:10228191-10230468	G	F	OK	0.711829	0.310594	-1.1965	2.35426	1	0.02665	0.999263	no	scarecrow transcription factor family protein
XLOC_001424	Prupe.1G275400	Pp01:28108985-28110810	G	F	OK	11.0797	6.78496	-0.707502	2.24777	1	0.0267	0.999263	no	ribonuclease T2 family protein
XLOC_000654	Prupe.1G121000	Pp01:9496651-9497408	G	F	OK	67.8373	101.036	0.574712	-2.22116	1	0.02685	0.999263	no	NA
XLOC_010915	Prupe.3G030600	Pp03:2278185-2280417	G	F	OK	0.951144	1.8723	0.977079	-2.18297	1	0.02685	0.999263	no	NA
XLOC_014189	Prupe.4G092800	Pp04:4658152-4662306	G	F	OK	24.4701	16.5281	-0.566096	2.15195	1	0.02705	0.999263	no	NA
XLOC_023153	Prupe.7G124400	Pp07:14651628-14653089	G	F	OK	1.81677	3.23946	0.834373	-2.25334	1	0.02715	0.999263	no	UGT73C1 (UDP-GLUCOSYL TRANSFERASE 73C1); UDP-glucosyltransferase/ UDP-glycosyltransferase/ cis-zeatin O-beta-D-glucosyltransferase/ trans-zeatin O-beta-D-glucosyltransferase/ transferase, transferring glycosyl groups
XLOC_022608	Prupe.7G006700	Pp07:870889-875260	G	F	OK	0.737656	0.37366	-0.981221	2.26339	1	0.0272	0.999263	no	helicase domain-containing protein / pentatricopeptide (PPR) repeat-containing protein
XLOC_020620	Prupe.6G258600	Pp06:25032610-25034918	G	F	OK	0.693397	0.198323	-1.80583	2.55944	1	0.0273	0.999263	no	NA
XLOC_015401	Prupe.5G059000	Pp05:6366401-6370602	G	F	OK	1.23129	0.652484	-0.916152	2.24002	1	0.02745	0.999263	no	transporter-related
XLOC_008931	Prupe.2G298700	Pp02:28812801-28814569	G	F	OK	7.56273	4.71487	-0.681689	2.19693	1	0.0275	0.999263	no	unknown protein
XLOC_003658	Prupe.1G134700	Pp01:10637438-10644102	G	F	OK	1.38418	0.828173	-0.741026	2.15246	1	0.0278	0.999263	no	binding
XLOC_018484	Prupe.6G191200	Pp06:19849330-19852362	G	F	OK	29.5033	19.8351	-0.572824	2.20517	1	0.0278	0.999263	no	2-dehydro-3-deoxyphosphoheptonate aldolase, putative / 3-deoxy-D-arabino-heptulosonate 7-phosphate synthase, putative / DAHP synthetase, putative
XLOC_024062	Prupe.8G044300	Pp08:4566541-4571888	G	F	OK	3.3751	2.17108	-0.636515	2.1722	1	0.0278	0.999263	no	disease resistance protein (TIR-NBS-LRR class), putative
XLOC_012283	Prupe.4G014300	Pp04:663608-666851	G	F	OK	1.11105	0.57172	-0.95854	2.2833	1	0.02785	0.999263	no	ankyrin repeat family protein
XLOC_017118	Prupe.5G167100	Pp05:14440448-14442749	G	F	OK	8.72343	5.54262	-0.654326	2.17637	1	0.0279	0.999263	no	ATMYB86 (MYB DOMAIN PROTEIN 86); specific transcriptional repressor/ transcription repressor
XLOC_016626	Prupe.5G059600	Pp05:6431806-6433544	G	F	OK	8.4913	5.34077	-0.668937	2.15142	1	0.028	0.999263	no	oxidoreductase, 2OG-Fe(II) oxygenase family protein
XLOC_018094	Prupe.6G115100	Pp06:8339259-8344531	G	F	OK	16.4453	10.944	-0.587536	2.13104	1	0.028	0.999263	no	serine carboxypeptidase S28 family protein
XLOC_009120	Prupe.3G007600	Pp03:468837-471467	G	F	OK	3.39568	2.09733	-0.695146	2.18194	1	0.02805	0.999263	no	aspartyl protease family protein
XLOC_021043	Prupe.6G339800	Pp06:29393567-29396899	G	F	OK	5.51493	8.67716	0.653881	-2.16508	1	0.0281	0.999263	no	unknown protein
XLOC_023985	Prupe.8G029600	Pp08:2754361-2756606	G	F	OK	5.23099	2.98829	-0.807764	2.20013	1	0.02825	0.999263	no	ankyrin repeat family protein
XLOC_004585	Prupe.1G321900	Pp01:30805343-30808243	G	F	OK	3.358	1.94381	-0.788719	2.11104	1	0.0286	0.999263	no	zinc finger (C3HC4-type RING finger) family protein
XLOC_008467	Prupe.2G199100	Pp02:23634241-23636644	G	F	OK	1.53918	2.80581	0.866258	-2.17942	1	0.0286	0.999263	no	ATOMT1 (O-METHYLTRANSFERASE 1); caffeate O-methyltransferase/ myricetin 3'-O-methyltransferase/ quercetin 3-O-methyltransferase
XLOC_018827	Prupe.6G257700	Pp06:24999328-25001992	G	F	OK	4.4801	2.74797	-0.705166	2.21855	1	0.02865	0.999263	no	LAC17 (laccase 17); laccase
XLOC_017914	Prupe.6G081300	Pp06:5510776-5511349	G	F	OK	141.451	209.814	0.568814	-2.21949	1	0.0287	0.999263	no	histone H4
XLOC_007597	Prupe.2G006200	Pp02:622757-623237	G	F	OK	0.703435	2.60557	1.88911	-2.61109	1	0.02885	0.999263	no	NA
XLOC_005857	Prupe.2G009800	Pp02:923342-924755	G	F	OK	2.98457	1.64835	-0.856505	2.22709	1	0.02885	0.999263	no	leucine-rich repeat family protein
XLOC_007789	Prupe.2G045700	Pp02:5141440-5147279	G	F	OK	4.22618	2.64527	-0.67594	2.16942	1	0.02905	0.999263	no	MAP65-5 (MICROTUBULE-ASSOCIATED PROTEIN 65-5); microtubule binding
XLOC_025680	Prupe.8G095400	Pp08:12761803-12764457	G	F	OK	1.5463	0.817905	-0.918815	2.24457	1	0.02925	0.999263	no	LAC11 (laccase 11); laccase
XLOC_011746	Prupe.3G210500	Pp03:21581004-21582600	G	F	OK	50.8098	34.3349	-0.565429	2.18607	1	0.0294	0.999263	no	FAD5 (FATTY ACID DESATURASE 5); 16:0 monogalactosyldiacylglycerol desaturase/ oxidoreductase
XLOC_024625	Prupe.8G155100,Prupe.8G155200	Pp08:16658932-16660180	G	F	OK	0	0.449492	Inf	NA	1	0.0294	0.999263	no	NA
XLOC_020615	Prupe.6G258000	Pp06:25011050-25013786	G	F	OK	0.85166	0.392595	-1.11724	2.28437	1	0.02945	0.999263	no	LAC17 (laccase 17); laccase
XLOC_008426	Prupe.2G191100	Pp02:23050005-23050840	G	F	OK	1.60096	3.37997	1.07808	-2.27532	1	0.0296	0.999263	no	LBD1 (LOB DOMAIN-CONTAINING PROTEIN 1)
XLOC_008441	Prupe.2G194400	Pp02:23259152-23260534	G	F	OK	36.5949	24.549	-0.575981	2.18931	1	0.0296	0.999263	no	ATHB-7 (ARABIDOPSIS THALIANA HOMEOBOX 7); transcription activator/ transcription factor
XLOC_024437	Prupe.8G115500	Pp08:14264500-14279627	G	F	OK	0.349594	0.190812	-0.873527	2.22184	1	0.0299	0.999263	no	POK2 (PHRAGMOPLAST ORIENTING KINESIN 2); ATP binding / microtubule motor
XLOC_000700	Prupe.1G127800	Pp01:10010101-10011080	G	F	OK	95.361	140.078	0.554759	-2.16901	1	0.02995	0.999263	no	NA
XLOC_012458	Prupe.4G046900	Pp04:2232783-2234780	G	F	OK	31.9444	47.1798	0.562607	-2.17509	1	0.03	0.999263	no	phosphoglycerate/bisphosphoglycerate mutase family protein
XLOC_019490	Prupe.6G023800	Pp06:1905930-1908706	G	F	OK	3.68133	2.20214	-0.741323	2.16708	1	0.03035	0.999263	no	NTT (NO TRANSMITTING TRACT); nucleic acid binding / transcription factor/ zinc ion binding
XLOC_011999	Prupe.3G267300	Pp03:24990591-25002197	G	F	OK	0.892884	0.496155	-0.84768	2.15187	1	0.0304	0.999263	no	ATSMC3 (ARABIDOPSIS THALIANA STRUCTURAL MAINTENANCE OF CHROMOSOME 3); ATP binding / transporter
XLOC_018251	Prupe.6G144100	Pp06:11685041-11687839	G	F	OK	2.60194	1.5121	-0.783029	2.2072	1	0.03065	0.999263	no	CONTAINS InterPro DOMAIN/s: Uncharacterised protein family UPF0005 (InterPro:IPR006214); BEST Arabidopsis thaliana protein match is: ALMT1 (ALUMINUM-ACTIVATED MALATE TRANSPORTER 1); malate transmembrane transporter (TAIR:AT1G08430.1); Has 377 Blast hits to 376 proteins in 91 species: Archae - 0; Bacteria - 139; Metazoa - 0; Fungi - 4; Plants - 211; Viruses - 0; Other Eukaryotes - 23 (source: NCBI…
XLOC_011050	Prupe.3G061900	Pp03:4424574-4426760	G	F	OK	0.461318	0.981951	1.08989	-2.25352	1	0.0309	0.999263	no	ankyrin repeat family protein
XLOC_019762	Prupe.6G077800	Pp06:5300153-5300953	G	F	OK	196.382	289.182	0.558319	-2.18363	1	0.0309	0.999263	no	NA
XLOC_024595	Prupe.8G145600	Pp08:16137965-16140996	G	F	OK	1.07926	0.538162	-1.00394	2.18682	1	0.0309	0.999263	no	glycosyl hydrolase family 10 protein
XLOC_010907	Prupe.3G029300	Pp03:2190158-2190516	G	F	OK	0	1.04986	Inf	NA	1	0.031	0.999263	no	NA
XLOC_009701	Prupe.3G119800	Pp03:10513315-10514438	G	F	OK	1.87806	0.661751	-1.50488	2.39568	1	0.031	0.999263	no	NA
XLOC_015052	Prupe.4G281600	Pp04:23958605-23958836	G	F	OK	0	1.35254	Inf	NA	1	0.031	0.999263	no	NA
XLOC_016587	Prupe.5G050900	Pp05:5450903-5451107	G	F	OK	0	2.18829	Inf	NA	1	0.031	0.999263	no	NA
XLOC_022816	Prupe.7G052100	Pp07:8996095-8997828	G	F	OK	12.0438	18.3827	0.610054	-2.17246	1	0.03135	0.999263	no	BG1 (BETA-1,3-GLUCANASE 1); catalytic/ cation binding / hydrolase, hydrolyzing O-glycosyl compounds
XLOC_024679	Prupe.8G163300	Pp08:17059501-17061821	G	F	OK	2.2197	1.20735	-0.878518	2.25697	1	0.03135	0.999263	no	thaumatin, putative
XLOC_013010	Prupe.4G150100	Pp04:8579867-8584302	G	F	OK	1.77359	1.0969	-0.693239	2.13814	1	0.0316	0.999263	no	NCED3 (NINE-CIS-EPOXYCAROTENOID DIOXYGENASE 3); 9-cis-epoxycarotenoid dioxygenase
XLOC_004873	Prupe.1G386900	Pp01:34638211-34639948	G	F	OK	23.306	34.3868	0.561152	-2.1696	1	0.0318	0.999263	no	CYP82C4; electron carrier/ heme binding / iron ion binding / monooxygenase/ oxygen binding
XLOC_012594	Prupe.4G070500	Pp04:3456498-3465832	G	F	OK	0.226479	0.0455127	-2.31504	1.43235	1	0.0319	0.999263	no	AG (AGAMOUS); DNA binding / transcription factor
XLOC_014857	Prupe.4G239500	Pp04:15742262-15743333	G	F	OK	0.554245	1.33267	1.26573	-2.27854	1	0.0319	0.999263	no	ATSERAT2;2 (SERINE ACETYLTRANSFERASE 2;2); serine O-acetyltransferase
XLOC_010091	Prupe.3G196500	Pp03:20724730-20728082	G	F	OK	0.417639	0.102113	-2.03209	2.52377	1	0.03215	0.999263	no	unknown protein
XLOC_025741	Prupe.8G110800	Pp08:14046170-14050182	G	F	OK	0.223149	0.500297	1.16478	-2.22704	1	0.0322	0.999263	no	disease resistance protein (TIR-NBS-LRR class), putative
XLOC_010428	Prupe.3G255800	Pp03:24431840-24433436	G	F	OK	4.74877	2.82878	-0.747371	2.14538	1	0.03225	0.999263	no	transcription initiation factor IIB-2 / general transcription factor TFIIB-2 (TFIIB2)
XLOC_007607	Prupe.2G007600	Pp02:699313-702526	G	F	OK	1.16473	0.642373	-0.858508	2.20634	1	0.03235	0.999263	no	C2 domain-containing protein
XLOC_007764	Prupe.2G040700	Pp02:4464831-4469459	G	F	OK	0.754118	0.407091	-0.889438	2.20521	1	0.0328	0.999263	no	disease resistance protein (NBS-LRR class), putative
XLOC_022843	Prupe.7G057100	Pp07:9640690-9641456	G	F	OK	9.61766	15.8037	0.716507	-2.14677	1	0.03285	0.999263	no	lipid binding
XLOC_010888	Prupe.3G026200	Pp03:1917133-1930665	G	F	OK	92.1074	61.5839	-0.580765	2.06837	1	0.0329	0.999263	no	beta-amyrin synthase, putative
XLOC_001798	Prupe.1G347000	Pp01:32431782-32451925	G	F	OK	6.15828	4.19259	-0.554686	2.16763	1	0.03295	0.999263	no	zinc finger (C3HC4-type RING finger) family protein
XLOC_016103	Prupe.5G194800	Pp05:15829977-15831079	G	F	OK	1.04863	2.121	1.01624	-2.19238	1	0.0331	0.999263	no	calcium-binding EF hand family protein
XLOC_002287	Prupe.1G436700	Pp01:37230088-37230783	G	F	OK	3.45856	6.29365	0.863728	-2.16418	1	0.03325	0.999263	no	NA
XLOC_011203	Prupe.3G093500	Pp03:7000028-7005357	G	F	OK	3.19193	1.97187	-0.694861	2.09907	1	0.0333	0.999263	no	nodulin family protein
XLOC_002726	Prupe.1G524600	Pp01:43002698-43004329	G	F	OK	0.551145	1.15693	1.0698	-2.20948	1	0.03335	0.999263	no	zinc finger (C3HC4-type RING finger) family protein
XLOC_003878	Prupe.1G179100	Pp01:15441366-15444327	G	F	OK	1.94023	1.14591	-0.759738	2.14171	1	0.0334	0.999263	no	NA
XLOC_019727	Prupe.6G071200	Pp06:4866211-4869040	G	F	OK	70.8651	101.65	0.520465	-2.03648	1	0.0338	0.999263	no	NA
XLOC_001633	Prupe.1G316700	Pp01:30521908-30522693	G	F	OK	4.95753	8.90462	0.844932	-2.16842	1	0.034	0.999263	no	NA
XLOC_011638	Prupe.3G183800	Pp03:19899174-19900852	G	F	OK	0.429417	0.0872847	-2.29858	2.788	1	0.0343	0.999263	no	leucine-rich repeat family protein
XLOC_015985	Prupe.5G169700	Pp05:14559229-14563809	G	F	OK	5.74005	3.81841	-0.588091	2.12858	1	0.03435	0.999263	no	kinase
XLOC_013547	Prupe.4G248300	Pp04:16572311-16574906	G	F	OK	17.0208	11.4611	-0.570561	2.13454	1	0.0344	0.999263	no	oxidoreductase, 2OG-Fe(II) oxygenase family protein
XLOC_025315	Prupe.8G019500	Pp08:1798643-1804248	G	F	OK	3.37828	2.1953	-0.621872	2.07718	1	0.0346	0.999263	no	PGSIP2 (PLANT GLYCOGENIN-LIKE STARCH INITIATION PROTEIN 2); transferase, transferring glycosyl groups
XLOC_005925	Prupe.2G023500	Pp02:2273678-2279248	G	F	OK	15.2873	10.5504	-0.535036	2.05442	1	0.03485	0.999263	no	disease resistance protein (NBS-LRR class), putative
XLOC_008786	Prupe.2G266400	Pp02:27278753-27283403	G	F	OK	3.91259	2.52318	-0.63288	2.06066	1	0.035	0.999263	no	leucine-rich repeat transmembrane protein kinase, putative
XLOC_000027	Prupe.1G005400	Pp01:469737-470644	G	F	OK	11.9901	7.50866	-0.675211	2.12457	1	0.03515	0.999263	no	NA
XLOC_015142	Prupe.5G009400	Pp05:973834-986555	G	F	OK	0.391215	0.20869	-0.906599	2.08519	1	0.03535	0.999263	no	ATP binding / ATP-dependent DNA helicase/ ATP-dependent helicase/ DNA binding / hydrolase, acting on acid anhydrides, in phosphorus-containing anhydrides / nucleic acid binding
XLOC_023275	Prupe.7G151300	Pp07:16233969-16236461	G	F	OK	0.250364	0.766897	1.615	-2.297	1	0.0355	0.999263	no	unknown protein
XLOC_000251	Prupe.1G043000	Pp01:3074396-3080116	G	F	OK	1.32671	1.18663	-0.16098	0.0742119	1	0.03595	0.999263	no	NA
XLOC_011925	Prupe.3G250100	Pp03:24003020-24005588	G	F	OK	0.31292	0.714803	1.19175	-2.13226	1	0.03595	0.999263	no	phospholipase C/ phosphoric diester hydrolase
XLOC_011232	Prupe.3G100300	Pp03:7687431-7689391	G	F	OK	44.9299	65.4777	0.543328	-2.09657	1	0.036	0.999263	no	J8; heat shock protein binding / unfolded protein binding
XLOC_001967	Prupe.1G380300	Pp01:34305976-34308677	G	F	OK	9.72214	6.45429	-0.591016	2.09942	1	0.0361	0.999263	no	catalytic/ cation binding / hydrolase, hydrolyzing O-glycosyl compounds
XLOC_007060	Prupe.2G234200	Pp02:25675893-25681830	G	F	OK	0.456011	0.183793	-1.31099	2.08649	1	0.03625	0.999263	no	HSP70 (heat shock protein 70); ATP binding
XLOC_026350	Prupe.8G234500	Pp08:20767928-20786335	G	F	OK	14.9197	10.3301	-0.530361	2.06023	1	0.03625	0.999263	no	WD-40 repeat family protein / beige-related
XLOC_005762	Prupe.1G579200	Pp01:47127714-47133939	G	F	OK	4.2274	2.78695	-0.601086	2.0498	1	0.0366	0.999263	no	BAM1 (BARELY ANY MERISTEM 1); ATP binding / kinase/ protein serine/threonine kinase
XLOC_006865	Prupe.2G193900	Pp02:23222816-23224767	G	F	OK	23.6929	16.2097	-0.547598	2.09503	1	0.03665	0.999263	no	unknown protein
XLOC_003465	Prupe.1G093800	Pp01:7212935-7216720	G	F	OK	0.153054	0.398946	1.38215	-2.13083	1	0.0368	0.999263	no	(R)-mandelonitrile lyase, putative / (R)-oxynitrilase, putative
XLOC_001208	Prupe.1G235800	Pp01:24947285-24952877	G	F	OK	2.88669	1.87954	-0.619036	2.08318	1	0.0368	0.999263	no	ATMRP3; ATPase, coupled to transmembrane movement of substances / chlorophyll catabolite transporter/ glutathione S-conjugate-exporting ATPase
XLOC_019291	Prupe.6G354200	Pp06:30120248-30122218	G	F	OK	13.0279	8.66276	-0.588703	2.08901	1	0.0368	0.999263	no	GDSL-motif lipase/hydrolase family protein
XLOC_014223	Prupe.4G096700	Pp04:4855312-4857119	G	F	OK	4.12708	2.55559	-0.691463	2.09511	1	0.03685	0.999263	no	FAD-binding domain-containing protein
XLOC_017601	Prupe.6G014400	Pp06:1022612-1045684	G	F	OK	12.2895	8.55574	-0.522456	2.00692	1	0.03695	0.999263	no	NA
XLOC_004813	Prupe.1G372800	Pp01:33921168-33927476	G	F	OK	6.32522	4.22831	-0.581035	2.12488	1	0.03705	0.999263	no	BGAL3 (beta-galactosidase 3); beta-galactosidase/ catalytic/ cation binding / sugar binding
XLOC_023009	Prupe.7G093400	Pp07:12579322-12581503	G	F	OK	0.784006	1.55819	0.990934	-2.14436	1	0.0373	0.999263	no	SYP121 (SYNTAXIN OF PLANTS 121); SNAP receptor/ protein anchor
XLOC_021777	Prupe.7G115200	Pp07:14050983-14059474	G	F	OK	18.2873	12.6104	-0.53623	2.04887	1	0.03735	0.999263	no	PDR11 (PLEIOTROPIC DRUG RESISTANCE 11); ATPase, coupled to transmembrane movement of substances
XLOC_022801	Prupe.7G048700	Pp07:8558595-8559796	G	F	OK	1.31261	0.533133	-1.29988	2.21834	1	0.0377	0.999263	no	unknown protein
XLOC_015965	Prupe.5G165400	Pp05:14370856-14371935	G	F	OK	12.4108	18.8546	0.603313	-2.11128	1	0.0378	0.999263	no	unknown protein
XLOC_021838	Prupe.7G128800	Pp07:14904292-14907624	G	F	OK	0.81502	1.53286	0.911322	-2.09436	1	0.0379	0.999263	no	MYB36 (myb domain protein 36); DNA binding / transcription factor
XLOC_022607	Prupe.7G006500	Pp07:822956-826757	G	F	OK	40.6061	27.9656	-0.538043	2.10216	1	0.038	0.999263	no	NA
XLOC_005387	Prupe.1G499500	Pp01:41364239-41364604	G	F	OK	0.361227	0	-Inf	NA	1	0.03815	0.999263	no	NA
XLOC_008811	Prupe.2G271500	Pp02:27514767-27515693	G	F	OK	0.410537	0	-Inf	NA	1	0.03815	0.999263	no	NA
XLOC_010931	Prupe.3G035100	Pp03:2561777-2562092	G	F	OK	0.512983	0	-Inf	NA	1	0.03815	0.999263	no	auxin-responsive family protein
XLOC_014065	Prupe.4G063000	Pp04:3015495-3015999	G	F	OK	0.291656	0	-Inf	NA	1	0.03815	0.999263	no	NA
XLOC_016523	Prupe.5G038700	Pp05:4334060-4334586	G	F	OK	0.653514	0	-Inf	NA	1	0.03815	0.999263	no	INVOLVED IN: biological_process unknown; LOCATED IN: endomembrane system, endoplasmic reticulum; EXPRESSED IN: 24 plant structures; EXPRESSED DURING: 15 growth stages; CONTAINS InterPro DOMAIN/s: Reticulon (InterPro:IPR003388); BEST Arabidopsis thaliana protein match is: unknown protein (TAIR:AT1G16825.1); Has 81 Blast hits to 81 proteins in 9 species: Archae - 0; Bacteria - 0; Metazoa - 0; Fungi…
XLOC_015919	Prupe.5G155000	Pp05:13883135-13883540	G	F	OK	0.29021	0	-Inf	NA	1	0.03815	0.999263	no	LTP4 (LIPID TRANSFER PROTEIN 4); lipid binding
XLOC_019376	Prupe.6G003000	Pp06:334124-334424	G	F	OK	0.583494	0	-Inf	NA	1	0.03815	0.999263	no	NA
XLOC_020157	Prupe.6G161200	Pp06:14971397-14971691	G	F	OK	0.616747	0	-Inf	NA	1	0.03815	0.999263	no	NA
XLOC_022159	Prupe.7G187400	Pp07:18069952-18070418	G	F	OK	0.222416	0	-Inf	NA	1	0.03815	0.999263	no	pentatricopeptide (PPR) repeat-containing protein
XLOC_024814	Prupe.8G191600	Pp08:18603588-18605655	G	F	OK	0.266369	0	-Inf	NA	1	0.03815	0.999263	no	NA
XLOC_025498	Prupe.8G058800	Pp08:7573445-7579682	G	F	OK	0.289282	0.0953187	-1.60164	2.23929	1	0.0383	0.999263	no	NA
XLOC_021743	Prupe.7G108400	Pp07:13681130-13683195	G	F	OK	0.757206	0.343842	-1.13894	2.18255	1	0.0384	0.999263	no	HSC70-1 (HEAT SHOCK COGNATE PROTEIN 70-1); ATP binding
XLOC_003158	Prupe.1G021500	Pp01:1496852-1498070	G	F	OK	6.21122	9.92657	0.676418	-2.06011	1	0.0385	0.999263	no	ELIP1 (EARLY LIGHT-INDUCABLE PROTEIN); chlorophyll binding
XLOC_004497	Prupe.1G305100	Pp01:29872377-29875418	G	F	OK	10.9551	7.23578	-0.598387	2.08704	1	0.0385	0.999263	no	oxidoreductase, acting on NADH or NADPH
XLOC_013027	Prupe.4G153100	Pp04:8778843-8785821	G	F	OK	11.522	17.6995	0.619323	-1.98339	1	0.0385	0.999263	no	NA
XLOC_021741	Prupe.7G108100	Pp07:13668067-13670121	G	F	OK	26.6441	18.328	-0.539766	2.07999	1	0.03855	0.999263	no	HSP70 (heat shock protein 70); ATP binding
XLOC_001993	Prupe.1G384400	Pp01:34483318-34484206	G	F	OK	0.956757	2.03049	1.0856	-2.12496	1	0.0387	0.999263	no	calmodulin-related protein, putative
XLOC_017056	Prupe.5G155600	Pp05:13909321-13912317	G	F	OK	0.30301	0.0754358	-2.00604	2.13434	1	0.0387	0.999263	no	LHT1; amino acid transmembrane transporter
XLOC_005509	Prupe.1G523700	Pp01:42896717-42898352	G	F	OK	2.2757	1.20385	-0.918655	2.10639	1	0.03885	0.999263	no	plastocyanin-like domain-containing protein
XLOC_000799	Prupe.1G146300	Pp01:11506632-11508592	G	F	OK	2.69665	1.61268	-0.741708	2.07704	1	0.03905	0.999263	no	unknown protein
XLOC_011583	Prupe.3G175000	Pp03:19188973-19206491	G	F	OK	9.47519	6.60296	-0.521042	2.00957	1	0.0391	0.999263	no	ATGSL07 (glucan synthase-like 7); 1,3-beta-glucan synthase/ transferase, transferring glycosyl groups
XLOC_000800	Prupe.1G146400	Pp01:11526852-11527722	G	F	OK	41.5662	28.1955	-0.559944	2.07144	1	0.0393	0.999263	no	unknown protein
XLOC_004134	Prupe.1G226200	Pp01:23936228-23941531	G	F	OK	0.965324	0.510562	-0.918929	2.05906	1	0.03935	0.999263	no	ASY1 (ASYNAPTIC 1); DNA binding
XLOC_004159	Prupe.1G231300	Pp01:24644518-24646469	G	F	OK	0.676066	1.31881	0.963997	-2.10142	1	0.0394	0.999263	no	CYP76C4; electron carrier/ heme binding / iron ion binding / monooxygenase/ oxygen binding
XLOC_006104	Prupe.2G054500	Pp02:6428084-6431952	G	F	OK	1.83176	1.13719	-0.687756	2.08463	1	0.0394	0.999263	no	disease resistance protein (NBS-LRR class), putative
XLOC_004539	Prupe.1G312900	Pp01:30327651-30329802	G	F	OK	55.6401	80.9124	0.540236	-2.07029	1	0.03945	0.999263	no	universal stress protein (USP) family protein
XLOC_010116	Prupe.3G200200	Pp03:20916951-20918052	G	F	OK	0.428493	1.07361	1.32512	-2.21991	1	0.0396	0.999263	no	SLY2 (SLEEPY2)
XLOC_003623	Prupe.1G126900	Pp01:9977228-9978141	G	F	OK	1.66178	3.73689	1.16911	-2.12753	1	0.03965	0.999263	no	MLP423 (MLP-LIKE PROTEIN 423)
XLOC_007963	Prupe.2G086300	Pp02:13672517-13674076	G	F	OK	59.8084	41.4821	-0.527861	2.0601	1	0.03965	0.999263	no	CYP77A4; electron carrier/ heme binding / iron ion binding / monooxygenase/ oxygen binding
XLOC_019683	Prupe.6G064000	Pp06:4414312-4416634	G	F	OK	8.23501	5.39341	-0.610571	2.05542	1	0.0397	0.999263	no	unknown protein
XLOC_021467	Prupe.7G057900	Pp07:9730048-9730832	G	F	OK	0.531593	1.39825	1.39523	-2.19968	1	0.0398	0.999263	no	NA
XLOC_016242	Prupe.5G223600	Pp05:17341414-17344750	G	F	OK	9.76727	14.395	0.559536	-2.06155	1	0.03985	0.999263	no	calmodulin binding
XLOC_014220	Prupe.4G096400	Pp04:4842618-4845010	G	F	OK	11.5864	7.80884	-0.56925	2.08903	1	0.04	0.999263	no	MEE23 (MATERNAL EFFECT EMBRYO ARREST 23); FAD binding / catalytic/ electron carrier/ oxidoreductase
XLOC_018411	Prupe.6G179000	Pp06:18375638-18385549	G	F	OK	12.0185	8.40641	-0.515697	1.99314	1	0.04	0.999263	no	binding
XLOC_000189	Prupe.1G033900	Pp01:2356475-2360944	G	F	OK	1.93606	3.09375	0.676234	-2.03813	1	0.0402	0.999263	no	ATCSLG2; cellulose synthase/ transferase/ transferase, transferring glycosyl groups
XLOC_000038	Prupe.1G007500	Pp01:647480-652622	G	F	OK	2.5175	1.54778	-0.70179	2.06804	1	0.04025	0.999263	no	ankyrin repeat family protein
XLOC_012381	Prupe.4G033300	Pp04:1555867-1556684	G	F	OK	2.35672	4.28406	0.862198	-2.08186	1	0.0404	0.999263	no	calcium-binding EF hand family protein
XLOC_001377	Prupe.1G266300	Pp01:27409970-27413185	G	F	OK	0.241055	0.0675446	-1.83545	2.36838	1	0.0405	0.999263	no	AtUGT85A2 (UDP-glucosyl transferase 85A2); UDP-glycosyltransferase/ glucuronosyltransferase/ transferase, transferring glycosyl groups
XLOC_005522	Prupe.1G526000	Pp01:43076565-43078106	G	F	OK	3.55836	5.75778	0.6943	-2.07802	1	0.0405	0.999263	no	ATGSTU7 (ARABIDOPSIS THALIANA GLUTATHIONE S-TRANSFERASE TAU 7); glutathione transferase
XLOC_001350	Prupe.1G261900	Pp01:27064214-27065166	G	F	OK	87.415	60.5931	-0.528728	2.06153	1	0.04055	0.999263	no	GLP7 (GERMIN-LIKE PROTEIN 7); manganese ion binding / nutrient reservoir
XLOC_022464	Prupe.7G246400	Pp07:20961298-20962330	G	F	OK	4.6996	7.86732	0.743335	-2.09595	1	0.04115	0.999263	no	ATBCB (ARABIDOPSIS BLUE-COPPER-BINDING PROTEIN); copper ion binding / electron carrier
XLOC_000780	Prupe.1G143200	Pp01:11275290-11293124	G	F	OK	21.8552	15.189	-0.524949	2.03019	1	0.04125	0.999263	no	SYD (SPLAYED); ATPase/ chromatin binding
XLOC_017632	Prupe.6G024400	Pp06:1958443-1974196	G	F	OK	44.203	30.0753	-0.555562	1.9964	1	0.0415	0.999263	no	UPL2 (UBIQUITIN-PROTEIN LIGASE 2); ubiquitin-protein ligase
XLOC_000702	Prupe.1G128300	Pp01:10025339-10026221	G	F	OK	0.284057	1.06063	1.90066	-2.36086	1	0.0416	0.999263	no	MLP423 (MLP-LIKE PROTEIN 423)
XLOC_015138	Prupe.5G008200	Pp05:864846-867175	G	F	OK	1.25114	0.668397	-0.904469	2.05217	1	0.04165	0.999263	no	catalytic/ cation binding / hydrolase, hydrolyzing O-glycosyl compounds
XLOC_018778	Prupe.6G249000	Pp06:24469804-24475574	G	F	OK	1.47231	0.852394	-0.788493	2.00823	1	0.04165	0.999263	no	NA
XLOC_020806	Prupe.6G296400	Pp06:27094441-27098269	G	F	OK	12.5874	8.66916	-0.53802	1.97498	1	0.04185	0.999263	no	unknown protein
XLOC_024404	Prupe.8G109000	Pp08:13911209-13916195	G	F	OK	2.63346	1.69174	-0.638449	2.03686	1	0.04205	0.999263	no	disease resistance protein (TIR-NBS-LRR class), putative
XLOC_019710	Prupe.6G069000	Pp06:4739006-4741640	G	F	OK	112.372	160.802	0.517001	-1.99019	1	0.0421	0.999263	no	tropinone reductase, putative / tropine dehydrogenase, putative
XLOC_020421	Prupe.6G216300	Pp06:22367090-22369422	G	F	OK	5.62819	3.7016	-0.60452	2.0334	1	0.0421	0.999263	no	AtRLP44 (Receptor Like Protein 44); protein binding
XLOC_003629	Prupe.1G128200	Pp01:10023219-10024097	G	F	OK	3.82073	6.57113	0.782294	-2.07387	1	0.04215	0.999263	no	NA
XLOC_018434	Prupe.6G183200	Pp06:19037458-19040864	G	F	OK	4.10724	2.73585	-0.58618	1.96272	1	0.04215	0.999263	no	VQ motif-containing protein
XLOC_022185	Prupe.7G192300	Pp07:18350214-18356360	G	F	OK	11.5577	7.96243	-0.537575	1.97915	1	0.0422	0.999263	no	SUS4; UDP-glycosyltransferase/ sucrose synthase/ transferase, transferring glycosyl groups
XLOC_011947	Prupe.3G257600	Pp03:24513955-24520912	G	F	OK	17.4305	12.1852	-0.516478	1.9916	1	0.04235	0.999263	no	glucan phosphorylase, putative
XLOC_007969	Prupe.2G087100	Pp02:13756316-13763655	G	F	OK	3.7816	5.7918	0.615018	-2.05326	1	0.0425	0.999263	no	NA
XLOC_019488	Prupe.6G023400	Pp06:1886519-1886747	G	F	OK	16.9193	34.9585	1.04697	-2.09412	1	0.0425	0.999263	no	NA
XLOC_018515	Prupe.6G197500	Pp06:20464774-20465989	G	F	OK	1.66854	2.99649	0.844689	-2.04174	1	0.0425	0.999263	no	UBP1 interacting protein 2a (UBA2a)
XLOC_005685	Prupe.1G563700	Pp01:46045850-46048719	G	F	OK	1.37482	2.9382	1.09569	-2.06589	1	0.04255	0.999263	no	ribosomal protein L20 family protein
XLOC_012613	Prupe.4G075000	Pp04:3672848-3675231	G	F	OK	13.8363	20.6619	0.578516	-1.99049	1	0.0426	0.999263	no	dehydratase family
XLOC_011431	Prupe.3G143600	Pp03:15580577-15581249	G	F	OK	1.52631	0.546205	-1.48253	2.18443	1	0.04275	0.999263	no	unknown protein
XLOC_024064	Prupe.8G044700	Pp08:4645192-4648216	G	F	OK	0.462165	0.157886	-1.54952	2.24473	1	0.0429	0.999263	no	unknown protein
XLOC_023532	Prupe.7G208400	Pp07:19129052-19132405	G	F	OK	0.389001	0.141281	-1.46121	2.11357	1	0.04295	0.999263	no	CKX3 (CYTOKININ OXIDASE 3); amine oxidase/ cytokinin dehydrogenase
XLOC_017715	Prupe.6G039200	Pp06:2952816-2955446	G	F	OK	31.7417	45.274	0.512305	-1.9882	1	0.0431	0.999263	no	RPT2 (ROOT PHOTOTROPISM 2); protein binding
XLOC_001955	Prupe.1G377700	Pp01:34168772-34172431	G	F	OK	0.749225	0.404963	-0.887611	1.98881	1	0.04315	0.999263	no	AtTLP6 (TUBBY LIKE PROTEIN 6); phosphoric diester hydrolase/ transcription factor
XLOC_021150	Prupe.6G364900	Pp06:30626214-30628368	G	F	OK	0.709987	0.256685	-1.46779	2.16272	1	0.04335	0.999263	no	FT (FLOWERING LOCUS T); phosphatidylethanolamine binding / protein binding
XLOC_011678	Prupe.3G192900	Pp03:20476173-20480004	G	F	OK	4.81099	3.12785	-0.621163	1.98274	1	0.0434	0.999263	no	unknown protein
XLOC_004487	Prupe.1G302500	Pp01:29696707-29700968	G	F	OK	14.6336	10.1732	-0.52451	1.9899	1	0.0436	0.999263	no	ABC transporter family protein
XLOC_016924	Prupe.5G125100	Pp05:12303784-12306940	G	F	OK	0.790574	1.49856	0.92261	-2.054	1	0.0436	0.999263	no	nodulin MtN3 family protein
XLOC_011509	Prupe.3G160200	Pp03:17899358-17902353	G	F	OK	0.772023	0.293912	-1.39326	2.16056	1	0.04365	0.999263	no	unknown protein
XLOC_012580	Prupe.4G069000	Pp04:3340431-3342633	G	F	OK	1.4696	0.601851	-1.28795	2.11514	1	0.0437	0.999263	no	NA
XLOC_005780	Prupe.1G582100	Pp01:47290946-47291871	G	F	OK	10.4346	6.67018	-0.645575	1.99771	1	0.0438	0.999263	no	unknown protein
XLOC_012645	Prupe.4G080700	Pp04:3917454-3919603	G	F	OK	2.58282	1.50962	-0.774764	2.05823	1	0.0438	0.999263	no	ATGA2OX2 (GIBBERELLIN 2-OXIDASE); gibberellin 2-beta-dioxygenase
XLOC_011486	Prupe.3G153600	Pp03:16766840-16767455	G	F	OK	908.4	620.706	-0.549417	2.06905	1	0.0439	0.999263	no	NA
XLOC_005190	Prupe.1G458300	Pp01:38384733-38388335	G	F	OK	3.47013	5.71074	0.718687	-2.012	1	0.04405	0.999263	no	NA
XLOC_023512	Prupe.7G204600	Pp07:18939062-18940533	G	F	OK	1.01479	0.473639	-1.09932	2.10226	1	0.0441	0.999263	no	FUNCTIONS IN: molecular_function unknown; INVOLVED IN: biological_process unknown; LOCATED IN: mitochondrion; EXPRESSED IN: shoot apex, sperm cell, embryo, flower, seed; EXPRESSED DURING: petal differentiation and expansion stage, D bilateral stage, E expanded cotyledon stage; CONTAINS InterPro DOMAIN/s: Pentatricopeptide repeat (InterPro:IPR002885); BEST Arabidopsis thaliana protein match is: pe…
XLOC_002598	Prupe.1G498700	Pp01:41303565-41304021	G	F	OK	1078.01	1565.9	0.538611	-2.02611	1	0.04445	0.999263	no	NA
XLOC_015222	Prupe.5G023600	Pp05:2638656-2641390	G	F	OK	35.0968	24.1653	-0.5384	1.96738	1	0.0445	0.999263	no	PRR1 (PINORESINOL REDUCTASE 1); pinoresinol reductase
XLOC_023542	Prupe.7G212000	Pp07:19339761-19345253	G	F	OK	0.198818	0.507759	1.3527	-1.90817	1	0.0445	0.999263	no	ACO1 (ACC OXIDASE 1); 1-aminocyclopropane-1-carboxylate oxidase
XLOC_000090	Prupe.1G016600	Pp01:1177719-1179272	G	F	OK	0.924455	1.68444	0.865591	-2.00748	1	0.0446	0.999263	no	GCN5-related N-acetyltransferase (GNAT) family protein
XLOC_019395	Prupe.6G007600	Pp06:638747-639149	G	F	OK	0.785573	2.85826	1.86332	-2.31448	1	0.0446	0.999263	no	COPT1 (copper transporter 1); copper ion transmembrane transporter
XLOC_017842	Prupe.6G064800	Pp06:4486553-4491135	G	F	OK	26.8237	18.7646	-0.515494	2.01959	1	0.0449	0.999263	no	NA
XLOC_014656	Prupe.4G192800	Pp04:11606233-11607418	G	F	OK	4.97989	7.92462	0.670227	-2.0152	1	0.0451	0.999263	no	calcium-binding EF hand family protein
XLOC_008856	Prupe.2G280800	Pp02:27982250-27984074	G	F	OK	23.8746	16.6957	-0.515997	1.96519	1	0.04535	0.999263	no	EXL3 (EXORDIUM LIKE 3)
XLOC_024175	Prupe.8G065500	Pp08:9710081-9710713	G	F	OK	13.2279	8.15507	-0.697812	2.03533	1	0.04545	0.999263	no	NA
XLOC_019881	Prupe.6G103700	Pp06:7253772-7259789	G	F	OK	1.19424	0.687187	-0.797316	1.68779	1	0.04555	0.999263	no	unknown protein
XLOC_003194	Prupe.1G029900	Pp01:2151088-2152553	G	F	OK	0.090926	0.466465	2.35901	-2.56187	1	0.0456	0.999263	no	NRPE7; DNA-directed RNA polymerase
XLOC_009410	Prupe.3G064300	Pp03:4595786-4596646	G	F	OK	23.6848	34.8092	0.555509	-2.02585	1	0.0457	0.999263	no	FUNCTIONS IN: molecular_function unknown; INVOLVED IN: biological_process unknown; LOCATED IN: chloroplast; EXPRESSED IN: 16 plant structures; EXPRESSED DURING: 12 growth stages; BEST Arabidopsis thaliana protein match is: VPS9B (TAIR:AT5G09320.1); Has 54 Blast hits to 54 proteins in 6 species: Archae - 0; Bacteria - 0; Metazoa - 0; Fungi - 0; Plants - 54; Viruses - 0; Other Eukaryotes - 0 (sourc…
XLOC_018403	Prupe.6G177700	Pp06:18284606-18287241	G	F	OK	2.91951	1.79093	-0.705018	2.02617	1	0.04615	0.999263	no	LAC11 (laccase 11); laccase
XLOC_010960	Prupe.3G041700	Pp03:2972760-2973474	G	F	OK	278.996	397.451	0.510535	-1.97426	1	0.0462	0.999263	no	NA
XLOC_026038	Prupe.8G171900	Pp08:17560514-17562404	G	F	OK	9.37984	6.25003	-0.5857	1.98987	1	0.0463	0.999263	no	O-methyltransferase family 2 protein
XLOC_010211	Prupe.3G217500	Pp03:21955491-21960126	G	F	OK	0.0662479	0.206019	1.63683	-1.32318	1	0.04635	0.999263	no	unknown protein
XLOC_014155	Prupe.4G083700	Pp04:4096770-4100129	G	F	OK	0.139615	0.368766	1.40125	-2.04939	1	0.04635	0.999263	no	INT2 (INOSITOL TRANSPORTER 2); carbohydrate transmembrane transporter/ sugar:hydrogen symporter
XLOC_012647	Prupe.4G080900	Pp04:3934069-3935561	G	F	OK	20.634	30.3184	0.55517	-1.98697	1	0.04645	0.999263	no	NA
XLOC_024387	Prupe.8G106400	Pp08:13763204-13766482	G	F	OK	3.24653	5.21277	0.683152	-1.9492	1	0.0465	0.999263	no	NA
XLOC_026422	Prupe.8G251300	Pp08:21608408-21609039	G	F	OK	1.4481	3.04031	1.07006	-2.05241	1	0.0465	0.999263	no	NA
XLOC_019950	Prupe.6G119200	Pp06:8801749-8804150	G	F	OK	4.2562	2.77468	-0.617243	1.99868	1	0.04665	0.999263	no	ADT6 (arogenate dehydratase 6); arogenate dehydratase/ prephenate dehydratase
XLOC_020408	Prupe.6G213700	Pp06:22141398-22148086	G	F	OK	2.02386	3.47118	0.778315	-1.95284	1	0.0468	0.999263	no	protein binding / zinc ion binding
XLOC_008744	Prupe.2G256800	Pp02:26855457-26863869	G	F	OK	22.3629	15.8563	-0.496057	1.9264	1	0.04695	0.999263	no	CHR42 (chromatin remodeling 42); ATP binding / DNA binding / helicase/ nucleic acid binding
XLOC_013535	Prupe.4G245500	Pp04:16285841-16286961	G	F	OK	0.629343	0.186924	-1.75139	2.25097	1	0.04705	0.999263	no	NA
XLOC_019665	Prupe.6G060500	Pp06:4189207-4190083	G	F	OK	6.84315	11.2495	0.717127	-2.00951	1	0.0471	0.999263	no	JOSL (JOSEPHIN-LIKE PROTEIN)
XLOC_020870	Prupe.6G309700	Pp06:27809195-27814788	G	F	OK	31.6899	48.762	0.621734	-1.95076	1	0.04715	0.999263	no	photosystem II reaction center PsbP family protein
XLOC_009773	Prupe.3G134500	Pp03:14090180-14091755	G	F	OK	25.9454	37.8629	0.545303	-2.01744	1	0.04725	0.999263	no	DNA-binding protein-related
XLOC_004079	Prupe.1G215400	Pp01:22829474-22837143	G	F	OK	13.8886	9.89244	-0.489501	1.89924	1	0.0473	0.999263	no	AML1 (ARABIDOPSIS MEI2-LIKE PROTEIN 1); RNA binding / protein binding
XLOC_017325	Prupe.5G207900	Pp05:16571837-16574272	G	F	OK	9.91694	6.69276	-0.567293	1.94921	1	0.0473	0.999263	no	IRX6
XLOC_023444	Prupe.7G191100	Pp07:18284588-18287921	G	F	OK	1.59534	0.917731	-0.797725	1.92648	1	0.04755	0.999263	no	basic helix-loop-helix (bHLH) family protein
XLOC_020388	Prupe.6G208400	Pp06:21683642-21690383	G	F	OK	0.358936	0.681489	0.924962	-1.9588	1	0.0476	0.999263	no	lyase
XLOC_022062	Prupe.7G168000	Pp07:17094991-17118254	G	F	OK	22.7162	15.9036	-0.514368	1.9393	1	0.0476	0.999263	no	binding / inositol or phosphatidylinositol kinase/ phosphotransferase, alcohol group as acceptor
XLOC_004072	Prupe.1G214300	Pp01:22750683-22753609	G	F	OK	9.84969	6.68859	-0.558376	1.97871	1	0.0478	0.999263	no	GUT2; catalytic/ glucuronoxylan glucuronosyltransferase
XLOC_020005	Prupe.6G130000	Pp06:10099378-10105171	G	F	OK	1.71039	1.10288	-0.633051	1.93748	1	0.0483	0.999263	no	disease resistance protein (NBS-LRR class), putative
XLOC_021737	Prupe.7G107600	Pp07:13592445-13595652	G	F	OK	4.11564	2.7329	-0.590685	1.9258	1	0.04835	0.999263	no	NA
XLOC_026049	Prupe.8G173600	Pp08:17656903-17659071	G	F	OK	1.4126	0.777181	-0.862027	2.00602	1	0.04855	0.999263	no	NA
XLOC_009778	Prupe.3G135800	Pp03:14327208-14332748	G	F	OK	3.00452	5.14626	0.77639	-2.01183	1	0.0486	0.999263	no	NA
XLOC_015583	Prupe.5G092100	Pp05:10261566-10262528	G	F	OK	1.09119	0.451309	-1.27372	2.05606	1	0.0486	0.999263	no	NA
XLOC_008881	Prupe.2G287800,Prupe.2G287900	Pp02:28324853-28331816	G	F	OK	21.0859	12.3802	-0.768246	1.95909	1	0.04905	0.999263	no	NA
XLOC_017901	Prupe.6G079000	Pp06:5382649-5384980	G	F	OK	4.29529	2.65431	-0.69442	1.92008	1	0.0492	0.999263	no	unknown protein
XLOC_015651	Prupe.5G104800	Pp05:11149455-11154584	G	F	OK	1.41828	0.87963	-0.68917	1.91299	1	0.04925	0.999263	no	pentatricopeptide (PPR) repeat-containing protein
XLOC_016303	Prupe.5G236500	Pp05:17893777-17898671	G	F	OK	2.22049	1.40623	-0.659047	1.92958	1	0.0494	0.999263	no	KT2 (POTASSIUM TRANSPORTER 2); potassium ion transmembrane transporter
XLOC_020109	Prupe.6G152200	Pp06:13208799-13209141	G	F	OK	0.838067	3.41945	2.02863	-2.30041	1	0.0494	0.999263	no	NA
XLOC_003645	Prupe.1G132200	Pp01:10413166-10415923	G	F	OK	0.261558	0.050938	-2.36032	2.20769	1	0.0497	0.999263	no	NA
XLOC_000676	Prupe.1G124100	Pp01:9778317-9779524	G	F	OK	0.696514	0.242343	-1.5231	2.11526	1	0.04985	0.999263	no	unknown protein
XLOC_002491	Prupe.1G477200	Pp01:39916134-39918327	G	F	OK	56.7198	39.9306	-0.506356	1.98024	1	0.04995	0.999263	no	RD22; nutrient reservoir
XLOC_022316	Prupe.7G217000	Pp07:19589217-19594698	G	F	OK	4.07791	2.71046	-0.589292	1.88907	1	0.0501	0.999263	no	anac075 (Arabidopsis NAC domain containing protein 75); transcription factor
XLOC_007663	Prupe.2G019400	Pp02:1909084-1911110	G	F	OK	0.178892	0.788322	2.1397	-1.81766	1	0.05015	0.999263	no	NA
XLOC_003008	Prupe.1G577200	Pp01:46987113-46988065	G	F	OK	3.75481	2.14362	-0.808688	2.0032	1	0.0504	0.999263	no	unknown protein
XLOC_018025	Prupe.6G101900	Pp06:7084899-7086612	G	F	OK	13.6349	19.5967	0.523308	-1.94049	1	0.0505	0.999263	no	unknown protein
XLOC_019069	Prupe.6G306100	Pp06:27618621-27626284	G	F	OK	1.68569	1.08751	-0.632308	1.95543	1	0.0506	0.999263	no	PDR9 (PLEIOTROPIC DRUG RESISTANCE 9); ATPase, coupled to transmembrane movement of substances
XLOC_001923	Prupe.1G371800	Pp01:33879049-33881684	G	F	OK	34.012	24.0803	-0.498191	1.92536	1	0.0507	0.999263	no	nodulin MtN21 family protein
XLOC_015659	Prupe.5G106100	Pp05:11237167-11238761	G	F	OK	35.7145	50.7451	0.506758	-1.92354	1	0.051	0.999263	no	heavy-metal-associated domain-containing protein
XLOC_016341	Prupe.5G244200	Pp05:18309700-18310613	G	F	OK	0.797541	1.89834	1.2511	-2.04812	1	0.051	0.999263	no	NA
XLOC_026440	Prupe.8G254300	Pp08:21741690-21742703	G	F	OK	1.06956	2.06221	0.947174	-1.99257	1	0.05105	0.999263	no	glutaredoxin family protein
XLOC_020486	Prupe.6G230900	Pp06:23375639-23377423	G	F	OK	4.16305	2.67413	-0.63857	1.93878	1	0.0512	0.999263	no	unknown protein
XLOC_026285	Prupe.8G222300	Pp08:20133242-20138394	G	F	OK	1.59942	0.894081	-0.83907	1.97435	1	0.05125	0.999263	no	LSH3 (LIGHT SENSITIVE HYPOCOTYLS 3)
XLOC_020802	Prupe.6G295800	Pp06:27066376-27068502	G	F	OK	26.414	18.4678	-0.51629	1.96313	1	0.05135	0.999263	no	(1-4)-beta-mannan endohydrolase, putative
XLOC_014595	Prupe.4G177200	Pp04:10508966-10510314	G	F	OK	1.74824	0.864091	-1.01664	2.00357	1	0.0518	0.999263	no	SPL5 (SQUAMOSA PROMOTER BINDING PROTEIN-LIKE 5); DNA binding / transcription factor
XLOC_013388	Prupe.4G216800	Pp04:13589256-13590385	G	F	OK	0.41546	0.994989	1.25997	-2.09398	1	0.05195	0.999263	no	NA
XLOC_019401	Prupe.6G009900	Pp06:751392-752633	G	F	OK	20.6436	30.053	0.541818	-1.98085	1	0.05195	0.999263	no	lipid binding
XLOC_019751	Prupe.6G075800	Pp06:5206999-5212637	G	F	OK	1.46183	0.874931	-0.740535	1.95968	1	0.05195	0.999263	no	XH/XS domain-containing protein / XS zinc finger domain-containing protein
XLOC_001211	Prupe.1G236300	Pp01:25052458-25053936	G	F	OK	0.120501	0.420577	1.80333	-2.22627	1	0.05215	0.999263	no	NA
XLOC_002000	Prupe.1G385500,Prupe.1G385600	Pp01:34566463-34576099	G	F	OK	2.51364	1.59688	-0.654522	1.89024	1	0.05215	0.999263	no	NA
XLOC_012795	Prupe.4G111900	Pp04:5924415-5926263	G	F	OK	0.606497	0.273993	-1.14636	2.01285	1	0.05215	0.999263	no	EXL1 (EXORDIUM LIKE 1)
XLOC_000919	Prupe.1G173100	Pp01:14462437-14471593	G	F	OK	0.874585	0.520881	-0.747645	1.98818	1	0.0522	0.999263	no	KINESIN-12B; microtubule motor/ plus-end-directed microtubule motor
XLOC_011010	Prupe.3G052000	Pp03:3671402-3673194	G	F	OK	28.7369	40.7083	0.502416	-1.94303	1	0.0524	0.999263	no	phosphatase
XLOC_023020	Prupe.7G097400	Pp07:12881688-12885558	G	F	OK	2.79495	1.83705	-0.605429	1.94577	1	0.05255	0.999263	no	heat shock protein-related
XLOC_004453	Prupe.1G295200	Pp01:29217246-29219299	G	F	OK	3.87952	2.36222	-0.715733	1.96242	1	0.0526	0.999263	no	methyladenine glycosylase family protein
XLOC_018890	Prupe.6G271500	Pp06:25730981-25734172	G	F	OK	5.15465	3.41762	-0.592885	1.93311	1	0.05275	0.999263	no	IRX12 (IRREGULAR XYLEM 12); laccase
XLOC_020604	Prupe.6G256300	Pp06:24912778-24917335	G	F	OK	9.15342	6.19583	-0.563014	1.92342	1	0.05285	0.999263	no	SPL9 (SQUAMOSA PROMOTER BINDING PROTEIN-LIKE 9); transcription factor
XLOC_015189	Prupe.5G018100	Pp05:1951680-1955331	G	F	OK	1.46964	0.828457	-0.826967	1.96528	1	0.053	0.999263	no	transferase family protein
XLOC_008791	Prupe.2G267600	Pp02:27337057-27340307	G	F	OK	22.2203	15.7179	-0.499468	1.88046	1	0.05315	0.999263	no	CYP714A1; electron carrier/ heme binding / iron ion binding / monooxygenase/ oxygen binding
XLOC_013609	Prupe.4G260800	Pp04:18871934-18872696	G	F	OK	8.90079	4.86485	-0.871538	1.95577	1	0.05335	0.999263	no	disease resistance protein (TIR-NBS class), putative
XLOC_010593	Prupe.3G289200	Pp03:26009484-26011807	G	F	OK	38.4417	27.3288	-0.492253	1.91916	1	0.0535	0.999263	no	ATNRT2.7 (Arabidopsis thaliana high affinity nitrate transporter 2.7); nitrate transmembrane transporter
XLOC_023489	Prupe.7G200300	Pp07:18724993-18725720	G	F	OK	86.5493	121.867	0.493708	-1.92507	1	0.0535	0.999263	no	GER3 (GERMIN 3); oxalate oxidase
XLOC_001705	Prupe.1G329100	Pp01:31266011-31268447	G	F	OK	0.0864974	0.331643	1.9389	-2.29801	1	0.05365	0.999263	no	FUNCTIONS IN: molecular_function unknown; INVOLVED IN: biological_process unknown; LOCATED IN: cellular_component unknown; EXPRESSED IN: root; CONTAINS InterPro DOMAIN/s: Rossmann-like alpha/beta/alpha sandwich fold (InterPro:IPR014729); BEST Arabidopsis thaliana protein match is: protein kinase family protein / U-box domain-containing protein (TAIR:AT2G45910.1); Has 196 Blast hits to 194 protein…
XLOC_004786	Prupe.1G368100	Pp01:33683347-33685088	G	F	OK	0.698752	1.28367	0.87742	-1.9507	1	0.05385	0.999263	no	auxin-responsive family protein
XLOC_002291	Prupe.1G437100	Pp01:37256568-37257240	G	F	OK	51.1107	73.237	0.518947	-1.96199	1	0.0539	0.999263	no	NA
XLOC_017642	Prupe.6G026100	Pp06:2069707-2073473	G	F	OK	0.693916	0.372726	-0.896645	1.95108	1	0.054	0.999263	no	OPT5 (OLIGOPEPTIDE TRANSPORTER 5); oligopeptide transporter
XLOC_025480	Prupe.8G053700	Pp08:6056190-6057460	G	F	OK	63.517	89.5083	0.49488	-1.93565	1	0.0541	0.999263	no	short-chain dehydrogenase/reductase (SDR) family protein
XLOC_012599	Prupe.4G072000	Pp04:3523299-3524401	G	F	OK	0.749024	1.52522	1.02593	-2.01663	1	0.05445	0.999263	no	NA
XLOC_016883	Prupe.5G116800	Pp05:11858302-11861819	G	F	OK	0.437793	0.207297	-1.07855	1.95475	1	0.0545	0.999263	no	NA
XLOC_005344	Prupe.1G490200	Pp01:40798955-40801759	G	F	OK	0.251539	0.550001	1.12865	-1.94678	1	0.0546	0.999263	no	BAT1 (BIDIRECTIONAL AMINO ACID TRANSPORTER 1); amino acid transmembrane transporter
XLOC_008895	Prupe.2G291900	Pp02:28518195-28519558	G	F	OK	4.28395	2.56969	-0.737347	1.91209	1	0.05475	0.999263	no	ATC (ARABIDOPSIS THALIANA CENTRORADIALIS); phosphatidylethanolamine binding
XLOC_000039	Prupe.1G007700	Pp01:655474-660641	G	F	OK	1.02016	0.576783	-0.822691	1.89613	1	0.0548	0.999263	no	FUNCTIONS IN: molecular_function unknown; INVOLVED IN: biological_process unknown; LOCATED IN: cellular_component unknown; CONTAINS InterPro DOMAIN/s: Ankyrin (InterPro:IPR002110); BEST Arabidopsis thaliana protein match is: unknown protein (TAIR:AT5G04680.1); Has 868 Blast hits to 744 proteins in 75 species: Archae - 0; Bacteria - 22; Metazoa - 164; Fungi - 15; Plants - 471; Viruses - 0; Other E…
XLOC_004211	Prupe.1G242400	Pp01:25625914-25627699	G	F	OK	1.17871	2.01977	0.776977	-1.94881	1	0.0548	0.999263	no	CYP71B36; electron carrier/ heme binding / iron ion binding / monooxygenase/ oxygen binding
XLOC_023622	Prupe.7G228100	Pp07:20138621-20141424	G	F	OK	32.5764	23.0695	-0.49784	1.9434	1	0.0549	0.999263	no	NA
XLOC_013887	Prupe.4G024000	Pp04:1132395-1139404	G	F	OK	9.03273	6.35152	-0.508061	1.90963	1	0.05505	0.999263	no	galactolipase/ phospholipase
XLOC_019207	Prupe.6G338200	Pp06:29321381-29321524	G	F	OK	148.01	27.1223	-2.44815	2.38969	1	0.05505	0.999263	no	NA
XLOC_017016	Prupe.5G145700	Pp05:13408224-13409076	G	F	OK	72.2051	51.1565	-0.497184	1.92281	1	0.0551	0.999263	no	NA
XLOC_018402	Prupe.6G177500	Pp06:18258983-18259241	G	F	OK	15.5158	7.197	-1.10827	1.97246	1	0.0561	0.999263	no	NA
XLOC_000463	Prupe.1G080600	Pp01:5898666-5900182	G	F	OK	5.61811	8.61793	0.617257	-1.91007	1	0.05615	0.999263	no	ATEP3; chitinase
XLOC_004410	Prupe.1G283900	Pp01:28574558-28577577	G	F	OK	0.795553	0.337878	-1.23545	1.9874	1	0.0563	0.999263	no	NA
XLOC_014664	Prupe.4G197900	Pp04:12117418-12120262	G	F	OK	11.7932	8.18783	-0.526397	1.92011	1	0.0563	0.999263	no	NA
XLOC_007330	Prupe.2G285500	Pp02:28225848-28228212	G	F	OK	0.452442	0.208677	-1.11646	1.95925	1	0.05635	0.999263	no	NA
XLOC_002264	Prupe.1G432800	Pp01:37040597-37043574	G	F	OK	1.00608	0.517918	-0.957943	1.93687	1	0.0564	0.999263	no	SPT (SPATULA); DNA binding / transcription factor
XLOC_024475	Prupe.8G122500	Pp08:14815602-14818803	G	F	OK	1.70292	2.78731	0.710862	-1.9079	1	0.0564	0.999263	no	transcriptional factor B3 family protein
XLOC_008391	Prupe.2G183600	Pp02:22555231-22555812	G	F	OK	67.3349	95.7747	0.50829	-1.92668	1	0.05655	0.999263	no	unknown protein
XLOC_012307	Prupe.4G017700	Pp04:828866-833902	G	F	OK	28.9532	20.6893	-0.484837	1.88254	1	0.0566	0.999263	no	aspartyl protease family protein
XLOC_019628	Prupe.6G054100	Pp06:3791228-3796294	G	F	OK	5.79192	4.0031	-0.532925	1.86678	1	0.05695	0.999263	no	ATKT1 (POTASSIUM TRANSPORTER 1); potassium ion transmembrane transporter
XLOC_009992	Prupe.3G175800	Pp03:19278816-19286059	G	F	OK	1.55517	0.956794	-0.700788	1.86011	1	0.05705	0.999263	no	NA
XLOC_026218	Prupe.8G207500	Pp08:19370302-19375550	G	F	OK	32.1134	45.0555	0.488527	-1.87229	1	0.05705	0.999263	no	unknown protein
XLOC_021497	Prupe.7G062800	Pp07:10169673-10172087	G	F	OK	0.592476	0.213057	-1.47552	2.04203	1	0.05715	0.999263	no	NA
XLOC_005821	Prupe.2G002200	Pp02:305726-308320	G	F	OK	2.16435	1.35636	-0.674187	1.93109	1	0.05725	0.999263	no	AAA-type ATPase family protein
XLOC_010307	Prupe.3G234300	Pp03:22987730-22993046	G	F	OK	0.263716	0.514042	0.962904	-1.97997	1	0.0573	0.999263	no	TPS04 (TERPENE SYNTHASE 04); (E,E)-geranyllinalool synthase
XLOC_012568	Prupe.4G066600	Pp04:3216010-3216965	G	F	OK	7.21269	11.0395	0.614069	-1.89537	1	0.0573	0.999263	no	NA
XLOC_026165	Prupe.8G196800	Pp08:18821166-18823175	G	F	OK	0.347371	0.125377	-1.4702	2.03466	1	0.0573	0.999263	no	CYP82G1; electron carrier/ heme binding / iron ion binding / monooxygenase/ oxygen binding
XLOC_021314	Prupe.7G031400	Pp07:5840806-5844754	G	F	OK	2.15092	1.3907	-0.629141	1.90435	1	0.05735	0.999263	no	PIN1 (PIN-FORMED 1); transporter
XLOC_019129	Prupe.6G318500	Pp06:28269920-28272171	G	F	OK	3.99872	2.63248	-0.603117	1.85627	1	0.0577	0.999263	no	pectinesterase family protein
XLOC_024303	Prupe.8G088900	Pp08:12226385-12230536	G	F	OK	0.377529	0.167946	-1.16859	1.60173	1	0.0577	0.999263	no	PAP10 (PURPLE ACID PHOSPHATASE 10); acid phosphatase/ protein serine/threonine phosphatase
XLOC_022796	Prupe.7G048000	Pp07:8471882-8476896	G	F	OK	1.07381	0.639608	-0.747481	1.83463	1	0.05775	0.999263	no	DCL2 (DICER-LIKE 2); ATP binding / ATP-dependent helicase/ RNA binding / double-stranded RNA binding / helicase/ nucleic acid binding / ribonuclease III
XLOC_018088	Prupe.6G114100	Pp06:8233140-8234103	G	F	OK	10.1118	6.64809	-0.605033	1.88549	1	0.0578	0.999263	no	harpin-induced protein-related / HIN1-related / harpin-responsive protein-related
XLOC_017229	Prupe.5G188900	Pp05:15534188-15536072	G	F	OK	2.02134	3.69166	0.868961	-1.8834	1	0.0579	0.999263	no	NA
XLOC_002398	Prupe.1G459400	Pp01:38467320-38468814	G	F	OK	46.9228	66.047	0.493202	-1.92313	1	0.05815	0.999263	no	unknown protein
XLOC_016695	Prupe.5G076300	Pp05:9040742-9045763	G	F	OK	22.1115	15.691	-0.494856	1.91366	1	0.05815	0.999263	no	BETA-VPE (BETA VACUOLAR PROCESSING ENZYME); cysteine-type endopeptidase
XLOC_004080	Prupe.1G215600	Pp01:22842508-22849999	G	F	OK	1.7573	1.15267	-0.608377	1.88514	1	0.0583	0.999263	no	tRNA-splicing endonuclease positive effector-related
XLOC_000403	Prupe.1G070300	Pp01:4989932-4993223	G	F	OK	2.65457	1.72284	-0.623691	1.83893	1	0.05835	0.999263	no	SDE3 (SILENCING DEFECTIVE); RNA helicase
XLOC_024255	Prupe.8G078500	Pp08:11261679-11265989	G	F	OK	2.79574	1.80379	-0.632203	1.87669	1	0.05835	0.999263	no	NA
XLOC_003477	Prupe.1G095600	Pp01:7563602-7567189	G	F	OK	50.6902	71.3129	0.492456	-1.89346	1	0.0584	0.999263	no	unknown protein
XLOC_026082	Prupe.8G179500	Pp08:18036685-18043658	G	F	OK	0.514974	0.297625	-0.791005	1.73678	1	0.0588	0.999263	no	disease resistance protein (TIR-NBS-LRR class), putative
XLOC_009163	Prupe.3G016500	Pp03:1178125-1180908	G	F	OK	0.0524927	0.263602	2.32817	-1.91242	1	0.05885	0.999263	no	GDSL-motif lipase/hydrolase family protein
XLOC_010677	Prupe.3G303600	Pp03:26689505-26690311	G	F	OK	0.320014	0.957458	1.58107	-2.1374	1	0.0589	0.999263	no	calcium-binding EF hand family protein
XLOC_014577	Prupe.4G172000	Pp04:10186975-10189910	G	F	OK	1.57826	2.49383	0.660022	-1.84834	1	0.0589	0.999263	no	BZIP61; DNA binding / transcription activator/ transcription factor
XLOC_004737	Prupe.1G358500	Pp01:33155370-33156265	G	F	OK	124.187	173.383	0.481447	-1.87911	1	0.05895	0.999263	no	ATGSTF8 (ARABIDOPSIS THALIANA GLUTATHIONE S-TRANSFERASE PHI 8); glutathione binding / glutathione transferase
XLOC_003469	Prupe.1G094500	Pp01:7331710-7334734	G	F	OK	72.7938	101.835	0.484348	-1.88792	1	0.0592	0.999263	no	small nuclear ribonucleoprotein E, putative / snRNP-E, putative / Sm protein E, putative
XLOC_024634	Prupe.8G156900	Pp08:16762025-16764721	G	F	OK	0.365507	0.122633	-1.57555	2.10533	1	0.0592	0.999263	no	unknown protein
XLOC_006434	Prupe.2G118700	Pp02:17687664-17696688	G	F	OK	36.5884	26.0534	-0.489918	1.89521	1	0.05925	0.999263	no	EIF4G (EUKARYOTIC TRANSLATION INITIATION FACTOR 4G); translation initiation factor
XLOC_004205	Prupe.1G241400	Pp01:25546916-25551615	G	F	OK	22.4514	16.0038	-0.488392	1.90777	1	0.0593	0.999263	no	unknown protein
XLOC_020012	Prupe.6G131500	Pp06:10325778-10329320	G	F	OK	13.3745	9.37375	-0.512789	1.82769	1	0.0593	0.999263	no	ankyrin repeat family protein
XLOC_003626	Prupe.1G127700	Pp01:10007663-10008722	G	F	OK	22.1229	31.6866	0.518331	-1.89577	1	0.05935	0.999263	no	MLP423 (MLP-LIKE PROTEIN 423)
XLOC_001285	Prupe.1G250400	Pp01:26246633-26247836	G	F	OK	38.2736	54.202	0.501998	-1.8959	1	0.0597	0.999263	no	unknown protein
XLOC_010693	Prupe.3G306600	Pp03:26802545-26804090	G	F	OK	3.37657	2.11007	-0.678268	1.89538	1	0.05985	0.999263	no	TSO2 (TSO meaning 'ugly' in Chinese); oxidoreductase/ ribonucleoside-diphosphate reductase/ transition metal ion binding
XLOC_016014	Prupe.5G175600	Pp05:14925720-14926767	G	F	OK	0.114022	0.532938	2.22466	-2.40323	1	0.05985	0.999263	no	zinc finger (C3HC4-type RING finger) family protein
XLOC_002293	Prupe.1G437300	Pp01:37263428-37263716	G	F	OK	3.70325	8.87718	1.26131	-2.00259	1	0.06005	0.999263	no	NA
XLOC_019606	Prupe.6G050100	Pp06:3539729-3542159	G	F	OK	0.547537	0.239649	-1.19204	1.97291	1	0.0602	0.999263	no	UDP-glucoronosyl/UDP-glucosyl transferase family protein
XLOC_024032	Prupe.8G037800	Pp08:3578743-3584786	G	F	OK	1.30166	0.812397	-0.680096	1.82021	1	0.0602	0.999263	no	RNR1 (RIBONUCLEOTIDE REDUCTASE 1); ATP binding / protein binding / ribonucleoside-diphosphate reductase
XLOC_015787	Prupe.5G130600	Pp05:12620362-12622662	G	F	OK	3.17974	1.99398	-0.673263	1.90738	1	0.0603	0.999263	no	basic helix-loop-helix (bHLH) family protein
XLOC_004281	Prupe.1G258100	Pp01:26791762-26792708	G	F	OK	22.6262	15.4507	-0.550327	1.89463	1	0.0606	0.999263	no	MLP423 (MLP-LIKE PROTEIN 423)
XLOC_018426	Prupe.6G181900	Pp06:18860887-18862349	G	F	OK	0.106784	0.374798	1.81142	-2.12834	1	0.0607	0.999263	no	NA
XLOC_005227	Prupe.1G466000	Pp01:38860574-38865492	G	F	OK	1.23213	0.75122	-0.713841	1.81938	1	0.06085	0.999263	no	ARF GTPase activator/ zinc ion binding
XLOC_025847	Prupe.8G134500	Pp08:15535983-15540361	G	F	OK	1.24487	0.761498	-0.709078	1.90076	1	0.0612	0.999263	no	leucine-rich repeat family protein / protein kinase family protein
XLOC_019089	Prupe.6G310000	Pp06:27824078-27826710	G	F	OK	0.331087	0.637223	0.944591	-1.91421	1	0.0613	0.999263	no	pentatricopeptide (PPR) repeat-containing protein
XLOC_021106	Prupe.6G353600	Pp06:30062641-30088753	G	F	OK	18.012	12.9952	-0.470973	1.83484	1	0.0614	0.999263	no	binding
XLOC_018923	Prupe.6G278000	Pp06:26094269-26096076	G	F	OK	52.1899	37.3376	-0.483141	1.88265	1	0.06145	0.999263	no	DNAJ heat shock protein, putative
XLOC_016763	Prupe.5G090800	Pp05:10118569-10119124	G	F	OK	1.59987	0.544423	-1.55515	2.06468	1	0.06155	0.999263	no	AP2 domain-containing protein
XLOC_008647	Prupe.2G235400	Pp02:25744085-25747286	G	F	OK	12.8547	8.90052	-0.530333	1.899	1	0.06175	0.999263	no	glycosyl hydrolase family 17 protein / beta-1,3-glucanase, putative
XLOC_011081	Prupe.3G066800	Pp03:4810577-4811724	G	F	OK	1.24667	2.38395	0.935269	-1.90112	1	0.06205	0.999263	no	NA
XLOC_000141	Prupe.1G027100	Pp01:1886083-1897068	G	F	OK	8.28567	5.82606	-0.508099	1.83452	1	0.06215	0.999263	no	phosphotransferase-related
XLOC_013714	Prupe.4G279600	Pp04:23605885-23608135	G	F	OK	7.87788	11.3558	0.527548	-1.86368	1	0.06215	0.999263	no	ATAF1; transcription activator/ transcription factor
XLOC_000310	Prupe.1G053400	Pp01:3712546-3719390	G	F	OK	7.5574	10.8981	0.528121	-1.87017	1	0.0622	0.999263	no	NA
XLOC_021740	Prupe.7G108000	Pp07:13628559-13631543	G	F	OK	1.39341	0.846215	-0.719523	1.88033	1	0.0622	0.999263	no	HSP70 (heat shock protein 70); ATP binding
XLOC_009124	Prupe.3G009400	Pp03:593433-594099	G	F	OK	7.02113	11.0646	0.656175	-1.88044	1	0.0623	0.999263	no	RAP2.4 (related to AP2 4); DNA binding / transcription factor
XLOC_004029	Prupe.1G205600	Pp01:20754782-20756357	G	F	OK	4.64811	7.09613	0.610389	-1.85594	1	0.06245	0.999263	no	ATEP3; chitinase
XLOC_013117	Prupe.4G172800	Pp04:10235514-10237858	G	F	OK	179.799	248.876	0.46904	-1.83238	1	0.06255	0.999263	no	unknown protein
XLOC_011619	Prupe.3G181400	Pp03:19721381-19725484	G	F	OK	0.300379	0.0940701	-1.67498	2.07948	1	0.0627	0.999263	no	NA
XLOC_019911	Prupe.6G109600	Pp06:7845414-7849686	G	F	OK	19.3053	13.7859	-0.485802	1.83078	1	0.06275	0.999263	no	scpl48 (serine carboxypeptidase-like 48); serine-type carboxypeptidase
XLOC_006926	Prupe.2G208500	Pp02:24166806-24168816	G	F	OK	21.3437	30.1516	0.498429	-1.88475	1	0.06285	0.999263	no	unknown protein
XLOC_021306	Prupe.7G029500	Pp07:5476278-5477596	G	F	OK	18.3893	12.7876	-0.524123	1.88237	1	0.0629	0.999263	no	NA
XLOC_011515	Prupe.3G161200	Pp03:18006855-18011836	G	F	OK	3.01689	2.05762	-0.552088	1.81955	1	0.063	0.999263	no	unknown protein
XLOC_010571	Prupe.3G284700	Pp03:25795564-25797324	G	F	OK	0.639216	0.278537	-1.19843	1.92442	1	0.06325	0.999263	no	oxidoreductase, zinc-binding dehydrogenase family protein
XLOC_024529	Prupe.8G131600	Pp08:15402349-15405472	G	F	OK	2.51014	1.5849	-0.663376	1.8607	1	0.06325	0.999263	no	cysteine proteinase, putative / thiol protease, putative
XLOC_026237	Prupe.8G211700,Prupe.8G211800	Pp08:19564239-19577259	G	F	OK	3.41875	2.38775	-0.517818	1.82808	1	0.06325	0.999263	no	NA
XLOC_016945	Prupe.5G130800	Pp05:12638844-12642142	G	F	OK	28.7862	20.5822	-0.48398	1.87539	1	0.0633	0.999263	no	hydrolase, alpha/beta fold family protein
XLOC_021923	Prupe.7G144900	Pp07:15862228-15863228	G	F	OK	0.724751	0.268679	-1.4316	1.97906	1	0.0633	0.999263	no	NA
XLOC_005985	Prupe.2G035600	Pp02:3850626-3861624	G	F	OK	8.80137	6.19111	-0.507529	1.87297	1	0.06345	0.999263	no	glycoside hydrolase family 2 protein
XLOC_013263	Prupe.4G195200	Pp04:11890805-11891765	G	F	OK	0.269543	0.858051	1.67055	-2.04407	1	0.06345	0.999263	no	NA
XLOC_012640	Prupe.4G078900	Pp04:3830765-3834868	G	F	OK	0.668913	0.381462	-0.81028	1.89626	1	0.06355	0.999263	no	RDR1 (RNA-DEPENDENT RNA POLYMERASE 1); RNA-directed RNA polymerase/ nucleic acid binding
XLOC_015226	Prupe.5G024400	Pp05:2740266-2749731	G	F	OK	13.5617	9.69858	-0.48369	1.81763	1	0.0639	0.999263	no	early-responsive to dehydration protein-related / ERD protein-related
XLOC_003429	Prupe.1G087800	Pp01:6539459-6539843	G	F	OK	0	0.231948	Inf	NA	1	0.06415	0.999263	no	NA
XLOC_006298	Prupe.2G092400	Pp02:14557416-14559161	G	F	OK	0	0.250447	Inf	NA	1	0.06415	0.999263	no	NA
XLOC_010039	Prupe.3G188300	Pp03:20168297-20168721	G	F	OK	0	0.265484	Inf	NA	1	0.06415	0.999263	no	plastocyanin-like domain-containing protein
XLOC_018976	Prupe.6G288200	Pp06:26644017-26644744	G	F	OK	0	0.256262	Inf	NA	1	0.06415	0.999263	no	NA
XLOC_020847	Prupe.6G304300	Pp06:27536792-27537059	G	F	OK	0	0.56423	Inf	NA	1	0.06415	0.999263	no	unknown protein
XLOC_021321	Prupe.7G032200	Pp07:5967317-5967545	G	F	OK	0	0.944825	Inf	NA	1	0.06415	0.999263	no	NA
XLOC_025539	Prupe.8G067700	Pp08:9952587-9952975	G	F	OK	0	4.90306	Inf	NA	1	0.06415	0.999263	no	NA
XLOC_024267	Prupe.8G081200	Pp08:11473807-11474113	G	F	OK	0	0.388239	Inf	NA	1	0.06415	0.999263	no	auxin-responsive protein, putative
XLOC_013911	Prupe.4G029100	Pp04:1355793-1357268	G	F	OK	7.49104	11.2436	0.585872	-1.83788	1	0.0642	0.999263	no	ATCXXS1 (C-terminal cysteine residue is changed to a serine 1); protein disulfide isomerase
XLOC_015354	Prupe.5G050700	Pp05:5395291-5431661	G	F	OK	19.7898	14.2473	-0.474064	1.81436	1	0.06435	0.999263	no	FUNCTIONS IN: molecular_function unknown; INVOLVED IN: biological_process unknown; EXPRESSED IN: 23 plant structures; EXPRESSED DURING: 13 growth stages; CONTAINS InterPro DOMAIN/s: Pleckstrin homology (InterPro:IPR001849); BEST Arabidopsis thaliana protein match is: phosphoinositide binding (TAIR:AT1G48090.2).
XLOC_014406	Prupe.4G137200	Pp04:7631269-7631850	G	F	OK	1.88094	5.05518	1.42631	-1.98589	1	0.06455	0.999263	no	NA
XLOC_018634	Prupe.6G221600	Pp06:22689574-22690328	G	F	OK	53.7691	75.2848	0.485582	-1.86043	1	0.06455	0.999263	no	60S ribosomal protein L26 (RPL26A)
XLOC_019407	Prupe.6G011600	Pp06:839935-847311	G	F	OK	0.246902	0.102792	-1.26421	1.86094	1	0.0646	0.999263	no	CMT3 (chromomethylase 3); DNA (cytosine-5-)-methyltransferase
XLOC_004510	Prupe.1G307800	Pp01:30016828-30017893	G	F	OK	2.01975	1.06283	-0.926259	1.88194	1	0.0647	0.999263	no	NA
XLOC_023195	Prupe.7G134200	Pp07:15215587-15225780	G	F	OK	32.2879	23.2837	-0.471672	1.79609	1	0.0648	0.999263	no	unknown protein
XLOC_008541	Prupe.2G211800	Pp02:24393790-24397929	G	F	OK	35.5331	25.6989	-0.467457	1.8038	1	0.0649	0.999263	no	pal1 (Phe ammonia lyase 1); phenylalanine ammonia-lyase
XLOC_003970	Prupe.1G196200	Pp01:18727685-18730075	G	F	OK	7.75763	5.37103	-0.530419	1.87268	1	0.06525	0.999263	no	CDC20.1; signal transducer
XLOC_026362	Prupe.8G236300	Pp08:20890098-20897951	G	F	OK	13.9884	10.1137	-0.46792	1.81652	1	0.0654	0.999263	no	FUNCTIONS IN: molecular_function unknown; INVOLVED IN: biological_process unknown; LOCATED IN: plasma membrane; EXPRESSED IN: 22 plant structures; EXPRESSED DURING: 13 growth stages; CONTAINS InterPro DOMAIN/s: Prefoldin (InterPro:IPR009053), KIP1-like (InterPro:IPR011684); BEST Arabidopsis thaliana protein match is: kinase interacting family protein (TAIR:AT3G22790.1); Has 169162 Blast hits to 6…
XLOC_005504	Prupe.1G522800	Pp01:42830934-42831562	G	F	OK	3.05363	5.32015	0.800942	-1.86855	1	0.0656	0.999263	no	unknown protein
XLOC_016412	Prupe.5G013800	Pp05:1490033-1490860	G	F	OK	11.8095	17.2745	0.548692	-1.82467	1	0.0656	0.999263	no	ATTIM17-2; P-P-bond-hydrolysis-driven protein transmembrane transporter/ protein transporter
XLOC_015802	Prupe.5G133500	Pp05:12778187-12782714	G	F	OK	1.47514	0.910971	-0.695375	1.78863	1	0.0656	0.999263	no	subtilase family protein
XLOC_019656	Prupe.6G059100	Pp06:4107296-4107788	G	F	OK	21.8996	32.2662	0.55912	-1.81671	1	0.06565	0.999263	no	ATPH1 (ARABIDOPSIS THALIANA PLECKSTRIN HOMOLOGUE 1); phosphoinositide binding
XLOC_000901	Prupe.1G169000	Pp01:13811673-13813004	G	F	OK	0.0804697	0.425901	2.404	-2.29387	1	0.06575	0.999263	no	NA
XLOC_001644	Prupe.1G318500	Pp01:30614503-30617644	G	F	OK	0.266512	0.0917951	-1.53771	1.83417	1	0.06575	0.999263	no	zinc finger (CCCH-type) family protein
XLOC_005934	Prupe.2G024800	Pp02:2466830-2468653	G	F	OK	0.284256	0.0927375	-1.61597	2.00078	1	0.06575	0.999263	no	AtSAT1 (Arabidopsis thaliana sterol O-acyltransferase 1); acyltransferase
XLOC_022566	Prupe.7G267000	Pp07:22008999-22010049	G	F	OK	58.4188	81.4031	0.478651	-1.85787	1	0.0659	0.999263	no	unknown protein
XLOC_008079	Prupe.2G111500	Pp02:16936868-16945304	G	F	OK	54.9456	39.2754	-0.484378	1.83074	1	0.066	0.999263	no	ATMRP9; ATPase, coupled to transmembrane movement of substances
XLOC_016378	Prupe.5G007000	Pp05:749988-752304	G	F	OK	61.521	84.5717	0.459097	-1.77681	1	0.06605	0.999263	no	immunophilin / FKBP-type peptidyl-prolyl cis-trans isomerase family protein
XLOC_017007	Prupe.5G143700	Pp05:13288962-13297362	G	F	OK	27.1659	38.7941	0.514043	-1.81444	1	0.06605	0.999263	no	ACP4 (acyl carrier protein 4); acyl carrier
XLOC_016866	Prupe.5G112700	Pp05:11638573-11647369	G	F	OK	1.66791	1.13966	-0.549434	1.80639	1	0.06615	0.999263	no	ATMRP14; ATPase, coupled to transmembrane movement of substances
XLOC_022395	Prupe.7G234400	Pp07:20406344-20420834	G	F	OK	26	18.8019	-0.467639	1.80378	1	0.06635	0.999263	no	GRV2 (GRAVITROPISM DEFECTIVE 2); binding / heat shock protein binding
XLOC_015681	Prupe.5G109900	Pp05:11464412-11465649	G	F	OK	2.11947	3.46203	0.707913	-1.86373	1	0.06645	0.999263	no	FUNCTIONS IN: molecular_function unknown; INVOLVED IN: biological_process unknown; LOCATED IN: plasma membrane; EXPRESSED IN: 15 plant structures; EXPRESSED DURING: 7 growth stages; CONTAINS InterPro DOMAIN/s: Harpin-induced 1 (InterPro:IPR010847); BEST Arabidopsis thaliana protein match is: unknown protein (TAIR:AT3G54200.1); Has 137 Blast hits to 136 proteins in 12 species: Archae - 0; Bacteria…
XLOC_024663	Prupe.8G161400	Pp08:16963407-16965285	G	F	OK	1.68291	0.939062	-0.841661	1.82317	1	0.06675	0.999263	no	proline-rich family protein
XLOC_004224	Prupe.1G246100	Pp01:25941337-25942769	G	F	OK	62.9038	86.6939	0.462783	-1.78776	1	0.0669	0.999263	no	protein binding / zinc ion binding
XLOC_004347	Prupe.1G272300	Pp01:27901034-27907994	G	F	OK	1.20104	0.776329	-0.629544	1.75343	1	0.0669	0.999263	no	Ran GTPase binding / chromatin binding / zinc ion binding
XLOC_022431	Prupe.7G240900	Pp07:20729047-20736891	G	F	OK	9.8234	6.92566	-0.50427	1.86242	1	0.06695	0.999263	no	NA
XLOC_008197	Prupe.2G135700	Pp02:19328596-19334987	G	F	OK	4.30195	3.06373	-0.4897	1.77047	1	0.06705	0.999263	no	disease resistance protein (TIR-NBS-LRR class), putative
XLOC_025259	Prupe.8G008700	Pp08:647144-650766	G	F	OK	0.272876	0.122422	-1.15639	1.91329	1	0.06725	0.999263	no	RPM1 (RESISTANCE TO P. SYRINGAE PV MACULICOLA 1); nucleotide binding / protein binding
XLOC_021046	Prupe.6G340300	Pp06:29420528-29422752	G	F	OK	17.9967	25.2113	0.486338	-1.81095	1	0.0674	0.999263	no	NA
XLOC_012639	Prupe.4G078800	Pp04:3823813-3828684	G	F	OK	2.35718	1.57868	-0.578345	1.8008	1	0.0675	0.999263	no	RDR1 (RNA-DEPENDENT RNA POLYMERASE 1); RNA-directed RNA polymerase/ nucleic acid binding
XLOC_019889	Prupe.6G104600	Pp06:7363586-7383319	G	F	OK	14.6537	10.6431	-0.461346	1.78688	1	0.0675	0.999263	no	MOM (MORPHEUS MOLECULE)
XLOC_025229	Prupe.8G001400	Pp08:121419-126875	G	F	OK	19.0452	13.7525	-0.469738	1.7752	1	0.06755	0.999263	no	RNA recognition motif (RRM)-containing protein
XLOC_017789	Prupe.6G052400	Pp06:3688312-3693065	G	F	OK	14.1209	10.1824	-0.471759	1.77631	1	0.0677	0.999263	no	protein kinase family protein
XLOC_002770	Prupe.1G534000	Pp01:43634646-43671581	G	F	OK	15.9208	11.5803	-0.459235	1.79245	1	0.068	0.999263	no	NA
XLOC_002711	Prupe.1G521200	Pp01:42746161-42751584	G	F	OK	13.4433	9.61038	-0.484223	1.83976	1	0.06805	0.999263	no	2-dehydro-3-deoxyphosphoheptonate aldolase, putative / 3-deoxy-D-arabino-heptulosonate 7-phosphate synthase, putative / DAHP synthetase, putative
XLOC_022044	Prupe.7G164400	Pp07:16900522-16902527	G	F	OK	0.234171	0.0476512	-2.29698	2.27168	1	0.06805	0.999263	no	leucine-rich repeat transmembrane protein kinase, putative
XLOC_000735	Prupe.1G134500	Pp01:10632044-10633385	G	F	OK	5.89273	3.88146	-0.602336	1.83819	1	0.06825	0.999263	no	unknown protein
XLOC_011751	Prupe.3G211100	Pp03:21608448-21614308	G	F	OK	3.04107	1.96492	-0.630109	1.79542	1	0.06825	0.999263	no	xanthine/uracil permease family protein
XLOC_004714	Prupe.1G351700,Prupe.1G351800	Pp01:32709118-32710495	G	F	OK	0	0.21154	Inf	NA	1	0.06835	0.999263	no	NA
XLOC_008279	Prupe.2G154800	Pp02:20840327-20840972	G	F	OK	1.8397	0.820679	-1.16458	1.89522	1	0.06835	0.999263	no	EXGT-A3; hydrolase, acting on glycosyl bonds / xyloglucan:xyloglucosyl transferase
XLOC_008741	Prupe.2G256100	Pp02:26807278-26810901	G	F	OK	83.8284	116.435	0.474013	-1.83246	1	0.06835	0.999263	no	ATFER2 (ferritin 2); binding / ferric iron binding / oxidoreductase/ transition metal ion binding
XLOC_018531	Prupe.6G200300	Pp06:20792297-20796142	G	F	OK	0.131463	0.277305	1.07682	-1.91229	1	0.06835	0.999263	no	NA
XLOC_004567	Prupe.1G318300	Pp01:30602478-30605150	G	F	OK	0.218168	0.7601	1.80075	-2.11581	1	0.0684	0.999263	no	NA
XLOC_003160	Prupe.1G021700	Pp01:1502642-1503865	G	F	OK	3.63896	5.93926	0.706756	-1.85685	1	0.0685	0.999263	no	ELIP1 (EARLY LIGHT-INDUCABLE PROTEIN); chlorophyll binding
XLOC_004903	Prupe.1G393200	Pp01:35005916-35014218	G	F	OK	2.36588	1.60664	-0.558323	1.82231	1	0.0685	0.999263	no	formin homology 2 domain-containing protein / FH2 domain-containing protein
XLOC_017966	Prupe.6G090800	Pp06:6210878-6211864	G	F	OK	7.64852	11.294	0.562299	-1.80608	1	0.0685	0.999263	no	NA
XLOC_007239	Prupe.2G267800	Pp02:27349174-27354987	G	F	OK	15.4984	11.2208	-0.465943	1.80629	1	0.0686	0.999263	no	FUNCTIONS IN: molecular_function unknown; INVOLVED IN: biological_process unknown; LOCATED IN: cellular_component unknown; EXPRESSED IN: 22 plant structures; EXPRESSED DURING: 13 growth stages; BEST Arabidopsis thaliana protein match is: COP1-interacting protein-related (TAIR:AT1G72410.1); Has 8834 Blast hits to 6495 proteins in 406 species: Archae - 8; Bacteria - 626; Metazoa - 3389; Fungi - 793…
XLOC_022101	Prupe.7G175200	Pp07:17458546-17467657	G	F	OK	41.1467	29.6035	-0.475009	1.82594	1	0.0687	0.999263	no	NRPB1 (RNA POLYMERASE II LARGE SUBUNIT); DNA binding / DNA-directed RNA polymerase
XLOC_002777	Prupe.1G535000	Pp01:43717329-43733490	G	F	OK	47.3608	33.5079	-0.499192	1.82817	1	0.06875	0.999263	no	UPL1 (UBIQUITIN-PROTEIN LIGASE 1); ubiquitin-protein ligase
XLOC_016875	Prupe.5G114500	Pp05:11753457-11754406	G	F	OK	158.031	218.262	0.465854	-1.81955	1	0.0688	0.999263	no	unknown protein
XLOC_000655	Prupe.1G121100	Pp01:9501156-9502201	G	F	OK	90.2696	124.163	0.459924	-1.80209	1	0.06905	0.999263	no	NA
XLOC_011652	Prupe.3G186600,Prupe.3G186700	Pp03:20080201-20082435	G	F	OK	56.8785	78.7361	0.469141	-1.78519	1	0.0691	0.999263	no	NA
XLOC_002823	Prupe.1G542800	Pp01:44348547-44353725	G	F	OK	0.784647	0.477932	-0.715238	1.79326	1	0.0692	0.999263	no	NA
XLOC_017631	Prupe.6G024000	Pp06:1923573-1926088	G	F	OK	1.0612	0.622363	-0.769873	1.84935	1	0.0693	0.999263	no	lectin protein kinase, putative
XLOC_006274	Prupe.2G087900	Pp02:13881810-13885616	G	F	OK	0.407833	0.764698	0.906913	-1.84303	1	0.06945	0.999263	no	NA
XLOC_007791	Prupe.2G047200	Pp02:5466374-5468252	G	F	OK	0.0801768	0.269096	1.74687	-2.04882	1	0.06955	0.999263	no	GTA2 (GLOBAL TRANSCRIPTION FACTOR GROUP A2); structural constituent of ribosome / transcription elongation regulator/ transcription factor
XLOC_023161	Prupe.7G125800	Pp07:14759737-14760721	G	F	OK	2.3917	1.34338	-0.832174	1.83462	1	0.06955	0.999263	no	nucleic acid binding / transcription factor/ zinc ion binding
XLOC_001735	Prupe.1G334600	Pp01:31623460-31629374	G	F	OK	31.2849	22.9365	-0.447816	1.76038	1	0.0696	0.999263	no	RDR1 (RNA-DEPENDENT RNA POLYMERASE 1); RNA-directed RNA polymerase/ nucleic acid binding
XLOC_002945	Prupe.1G564300	Pp01:46096257-46098769	G	F	OK	1.3793	0.80346	-0.779643	1.84343	1	0.0699	0.999263	no	WRKY9; transcription factor
XLOC_023273	Prupe.7G150900	Pp07:16214662-16216336	G	F	OK	14.3269	10.1087	-0.503122	1.81599	1	0.07	0.999263	no	transcription factor
XLOC_003493	Prupe.1G098100	Pp01:7839491-7840728	G	F	OK	0.211863	0.7423	1.80887	-2.01523	1	0.07005	0.999263	no	nodulin MtN21 family protein
XLOC_024808	Prupe.8G190400	Pp08:18550926-18552295	G	F	OK	15.125	10.3007	-0.554186	1.8128	1	0.07005	0.999263	no	unknown protein
XLOC_004272	Prupe.1G255700	Pp01:26618213-26619648	G	F	OK	0.966619	1.68863	0.804834	-1.83168	1	0.0702	0.999263	no	unknown protein
XLOC_005580	Prupe.1G538300	Pp01:43990879-43996215	G	F	OK	4.86342	3.3243	-0.548923	1.79415	1	0.0704	0.999263	no	lyase
XLOC_006153	Prupe.2G062100	Pp02:8002573-8008224	G	F	OK	41.4662	30.0557	-0.464296	1.81303	1	0.0706	0.999263	no	NA
XLOC_019090	Prupe.6G310200	Pp06:27829980-27831176	G	F	OK	1.16016	2.60459	1.16673	-1.92815	1	0.07065	0.999263	no	agenet domain-containing protein
XLOC_014345	Prupe.4G121500	Pp04:6579647-6584258	G	F	OK	5.56702	3.91965	-0.506181	1.80986	1	0.0707	0.999263	no	BAM3 (BARELY ANY MERISTEM 3); ATP binding / protein binding / protein kinase/ protein serine/threonine kinase
XLOC_001184	Prupe.1G230800	Pp01:24440245-24442335	G	F	OK	11.2203	15.7332	0.487707	-1.794	1	0.07115	0.999263	no	CYP76C4; electron carrier/ heme binding / iron ion binding / monooxygenase/ oxygen binding
XLOC_011374	Prupe.3G130700	Pp03:13341402-13344812	G	F	OK	0.350669	0.163782	-1.09833	1.87812	1	0.07115	0.999263	no	disease resistance protein (TIR-NBS-LRR class), putative
XLOC_016185	Prupe.5G211000	Pp05:16761852-16767231	G	F	OK	0.226717	0.103028	-1.13785	1.66884	1	0.0713	0.999263	no	nucleotide binding
XLOC_016235	Prupe.5G222400	Pp05:17279003-17280722	G	F	OK	1.16064	1.95312	0.750854	-1.82439	1	0.0713	0.999263	no	MYB116 (myb domain protein 116); DNA binding / transcription factor
XLOC_013875	Prupe.4G021400	Pp04:1010548-1012299	G	F	OK	77.9885	107.729	0.466079	-1.81851	1	0.07135	0.999263	no	unknown protein
XLOC_006343	Prupe.2G101500	Pp02:15743321-15744270	G	F	OK	3.69022	6.13203	0.732659	-1.83667	1	0.0714	0.999263	no	ATGSTU8 (GLUTATHIONE S-TRANSFERASE TAU 8); glutathione transferase
XLOC_014574	Prupe.4G171400	Pp04:10124943-10129442	G	F	OK	19.0659	13.6409	-0.483062	1.80098	1	0.0714	0.999263	no	sodium/calcium exchanger family protein / calcium-binding EF hand family protein
XLOC_004690	Prupe.1G346500	Pp01:32386982-32389461	G	F	OK	10.7466	15.1703	0.497371	-1.81904	1	0.07145	0.999263	no	AtPPT1 (Arabidopsis thaliana polyprenyltransferase 1); 4-hydroxybenzoate nonaprenyltransferase
XLOC_012435	Prupe.4G043100	Pp04:2058174-2062262	G	F	OK	2.49454	3.90685	0.647233	-1.77168	1	0.07155	0.999263	no	NA
XLOC_018069	Prupe.6G111000	Pp06:7969785-7975586	G	F	OK	31.9996	23.4176	-0.450465	1.74303	1	0.0716	0.999263	no	unknown protein
XLOC_002547	Prupe.1G488300	Pp01:40652754-40654198	G	F	OK	4.06373	2.51883	-0.690048	1.81618	1	0.0717	0.999263	no	NA
XLOC_001991	Prupe.1G384100	Pp01:34476931-34478579	G	F	OK	6.4028	4.35068	-0.557462	1.81102	1	0.0719	0.999263	no	PARVUS (PARVUS); polygalacturonate 4-alpha-galacturonosyltransferase/ transferase, transferring glycosyl groups / transferase, transferring hexosyl groups
XLOC_005194	Prupe.1G459000	Pp01:38429954-38441443	G	F	OK	15.2271	11.2105	-0.441792	1.73796	1	0.0721	0.999263	no	unknown protein
XLOC_011462	Prupe.3G149000	Pp03:16268017-16268761	G	F	OK	9.92981	16.6592	0.746481	-1.80593	1	0.0721	0.999263	no	NA
XLOC_017707	Prupe.6G038100	Pp06:2864741-2868370	G	F	OK	3.80558	5.55096	0.544623	-1.80948	1	0.07225	0.999263	no	CYP714A1; electron carrier/ heme binding / iron ion binding / monooxygenase/ oxygen binding
XLOC_022535	Prupe.7G260600	Pp07:21671229-21674113	G	F	OK	47.8097	65.8271	0.461379	-1.77745	1	0.07235	0.999263	no	40S ribosomal protein S12 (RPS12C)
XLOC_018549	Prupe.6G203000	Pp06:21051433-21056719	G	F	OK	0.319047	0.137494	-1.2144	1.89797	1	0.0724	0.999263	no	AIL6 (AINTEGUMENTA-LIKE 6); DNA binding / transcription factor
XLOC_013660	Prupe.4G270200	Pp04:21738300-21743151	G	F	OK	0.297181	0.128104	-1.21402	1.89737	1	0.07245	0.999263	no	NA
XLOC_012708	Prupe.4G091400	Pp04:4557341-4565470	G	F	OK	18.0717	13.2121	-0.451868	1.72214	1	0.07285	0.999263	no	HEN1 (HUA ENHANCER 1); RNA methyltransferase
XLOC_012996	Prupe.4G147200	Pp04:8422775-8424441	G	F	OK	2.55773	4.08048	0.673874	-1.8113	1	0.07285	0.999263	no	ATGSTU19 (GLUTATHIONE S-TRANSFERASE TAU 19); glutathione binding / glutathione transferase
XLOC_016352	Prupe.5G000300	Pp05:134192-141587	G	F	OK	24.883	18.1532	-0.45494	1.76157	1	0.07285	0.999263	no	CESA6 (CELLULOSE SYNTHASE 6); cellulose synthase/ transferase, transferring glycosyl groups
XLOC_005814	Prupe.2G000800	Pp02:197770-200087	G	F	OK	0.590315	0.266989	-1.1447	1.83152	1	0.0731	0.999263	no	NA
XLOC_023050	Prupe.7G103600	Pp07:13310948-13317922	G	F	OK	0.629314	0.365807	-0.782695	1.75932	1	0.0731	0.999263	no	kinesin motor protein-related
XLOC_008208	Prupe.2G139600	Pp02:19661005-19661588	G	F	OK	15.8251	23.16	0.549422	-1.76368	1	0.0732	0.999263	no	protease inhibitor/seed storage/lipid transfer protein (LTP) family protein
XLOC_008253	Prupe.2G149000	Pp02:20442476-20468033	G	F	OK	9.13604	6.69868	-0.447692	1.74789	1	0.07325	0.999263	no	WD-40 repeat family protein / beige-related
XLOC_023697	Prupe.7G243000	Pp07:20822101-20831112	G	F	OK	40.5327	55.4284	0.45154	-1.73381	1	0.07325	0.999263	no	NA
XLOC_010820	Prupe.3G014400	Pp03:1026993-1031590	G	F	OK	1.51129	0.946501	-0.675105	1.73152	1	0.0733	0.999263	no	anac028 (Arabidopsis NAC domain containing protein 28); transcription factor
XLOC_019686	Prupe.6G065300	Pp06:4512893-4516034	G	F	OK	0.414135	0.142262	-1.54155	1.94582	1	0.0733	0.999263	no	protein kinase-related
XLOC_018680	Prupe.6G229200	Pp06:23280505-23283858	G	F	OK	0.833715	0.483165	-0.78704	1.83085	1	0.07335	0.999263	no	leucine-rich repeat family protein / protein kinase family protein
XLOC_007304	Prupe.2G281400	Pp02:28019719-28023596	G	F	OK	2.48556	1.63801	-0.60163	1.80302	1	0.0734	0.999263	no	leucine-rich repeat transmembrane protein kinase, putative
XLOC_002617	Prupe.1G503000	Pp01:41593108-41594112	G	F	OK	28.8683	40.2352	0.478972	-1.80789	1	0.0735	0.999263	no	NA
XLOC_023452	Prupe.7G192500	Pp07:18357080-18367007	G	F	OK	22.1508	16.1241	-0.458137	1.74895	1	0.0736	0.999263	no	CAAX amino terminal protease family protein
XLOC_000893	Prupe.1G166200	Pp01:13495893-13497978	G	F	OK	0.315902	0.125481	-1.33201	1.89961	1	0.07375	0.999263	no	exostosin family protein
XLOC_015480	Prupe.5G072500	Pp05:8722018-8729839	G	F	OK	8.98044	5.61546	-0.677382	1.75121	1	0.074	0.999263	no	NA
XLOC_015608	Prupe.5G096300	Pp05:10545076-10550636	G	F	OK	5.84266	4.14546	-0.495094	1.80287	1	0.0742	0.999263	no	unknown protein
XLOC_009404	Prupe.3G063000	Pp03:4505442-4508106	G	F	OK	15.116	21.5737	0.513194	-1.75765	1	0.07425	0.999263	no	cox19 family protein
XLOC_025091	Prupe.8G246100	Pp08:21353227-21355724	G	F	OK	3.22772	2.10489	-0.616772	1.78239	1	0.0743	0.999263	no	GDSL-motif lipase/hydrolase family protein
XLOC_005467	Prupe.1G515600	Pp01:42398725-42402005	G	F	OK	6.98337	4.94104	-0.499109	1.78342	1	0.0744	0.999263	no	leucine-rich repeat transmembrane protein kinase, putative
XLOC_022451	Prupe.7G244700	Pp07:20898119-20900110	G	F	OK	73.0716	100.517	0.460061	-1.79865	1	0.0744	0.999263	no	binding
XLOC_014262	Prupe.4G103200	Pp04:5274504-5276425	G	F	OK	7.12354	10.1705	0.513722	-1.78771	1	0.0745	0.999263	no	CYP716A1; electron carrier/ heme binding / iron ion binding / monooxygenase/ oxygen binding
XLOC_018964	Prupe.6G285300	Pp06:26474183-26476653	G	F	OK	14.5772	10.5457	-0.467056	1.70791	1	0.0745	0.999263	no	SEC14 cytosolic factor family protein / phosphoglyceride transfer family protein
XLOC_010828	Prupe.3G015700	Pp03:1127784-1128911	G	F	OK	1.3851	2.40282	0.794739	-1.7829	1	0.0746	0.999263	no	NA
XLOC_021360	Prupe.7G037500	Pp07:6888828-6900912	G	F	OK	0.495038	0.292199	-0.760587	1.75893	1	0.07465	0.999263	no	NA
XLOC_003397	Prupe.1G081000,Prupe.1G081100	Pp01:5937672-5940402	G	F	OK	0.858267	0.414333	-1.05063	1.75255	1	0.0748	0.999263	no	NA
XLOC_013667	Prupe.4G271200	Pp04:22088620-22094365	G	F	OK	1283.23	1817.48	0.50216	-1.75115	1	0.07485	0.999263	no	PSAN; calmodulin binding
XLOC_022419	Prupe.7G239000	Pp07:20630096-20633492	G	F	OK	0.360568	0.661099	0.874596	-1.81179	1	0.075	0.999263	no	ATP binding / protein kinase/ protein serine/threonine kinase/ protein tyrosine kinase/ sugar binding
XLOC_021969	Prupe.7G153000	Pp07:16309237-16312203	G	F	OK	0.576623	0.277661	-1.05431	1.81	1	0.07505	0.999263	no	F-box family protein
XLOC_022412	Prupe.7G237200	Pp07:20549210-20550340	G	F	OK	27.308	38.3549	0.490089	-1.81023	1	0.0752	0.999263	no	EXLB3 (EXPANSIN-LIKE B3 PRECURSOR)
XLOC_011459	Prupe.3G148300	Pp03:16213838-16214957	G	F	OK	0.646558	0.239715	-1.43146	1.88836	1	0.07525	0.999263	no	pathogenesis-related thaumatin family protein
XLOC_000616	Prupe.1G113700	Pp01:9030790-9031211	G	F	OK	0.545657	0	-Inf	NA	1	0.07535	0.999263	no	NA
XLOC_000744	Prupe.1G136200	Pp01:10704250-10704612	G	F	OK	0.297728	0	-Inf	NA	1	0.07535	0.999263	no	NA
XLOC_001723	Prupe.1G332400	Pp01:31488007-31488758	G	F	OK	0.527141	0	-Inf	NA	1	0.07535	0.999263	no	NA
XLOC_005153	Prupe.1G450400	Pp01:37956483-37956840	G	F	OK	0.253032	0	-Inf	NA	1	0.07535	0.999263	no	NA
XLOC_008731	Prupe.2G254300	Pp02:26722910-26723961	G	F	OK	0.411165	0	-Inf	NA	1	0.07535	0.999263	no	pollen Ole e 1 allergen and extensin family protein
XLOC_011004	Prupe.3G050400	Pp03:3561854-3562342	G	F	OK	0.279356	0	-Inf	NA	1	0.07535	0.999263	no	NA
XLOC_009935	Prupe.3G164700	Pp03:18366676-18367085	G	F	OK	0.411165	0	-Inf	NA	1	0.07535	0.999263	no	NA
XLOC_012172	Prupe.3G304900	Pp03:26738996-26739595	G	F	OK	0.212361	0	-Inf	NA	1	0.07535	0.999263	no	NA
XLOC_015602	Prupe.5G095000	Pp05:10477859-10478359	G	F	OK	0.462881	0	-Inf	NA	1	0.07535	0.999263	no	NA
XLOC_018665	Prupe.6G227200	Pp06:23149851-23150986	G	F	OK	0.33922	0	-Inf	NA	1	0.07535	0.999263	no	NA
XLOC_020789	Prupe.6G293700	Pp06:26980477-26980852	G	F	OK	0.227036	0	-Inf	NA	1	0.07535	0.999263	no	NA
XLOC_022867	Prupe.7G063700	Pp07:10245819-10246131	G	F	OK	0.350547	0	-Inf	NA	1	0.07535	0.999263	no	unknown protein
XLOC_023278	Prupe.7G151900	Pp07:16270330-16270639	G	F	OK	0.3595	0	-Inf	NA	1	0.07535	0.999263	no	NA
XLOC_003233	Prupe.1G042100	Pp01:3003980-3008240	G	F	OK	1.27331	0.798113	-0.673918	1.79349	1	0.0755	0.999263	no	phragmoplast-associated kinesin-related protein 2 (PAKRP2)
XLOC_001236	Prupe.1G240400	Pp01:25442926-25448229	G	F	OK	10.2885	7.40827	-0.473819	1.79357	1	0.07555	0.999263	no	ORP1D (OSBP(OXYSTEROL BINDING PROTEIN)-RELATED PROTEIN 1D); oxysterol binding
XLOC_010430	Prupe.3G256000	Pp03:24440755-24442756	G	F	OK	4.03852	2.68049	-0.591331	1.76931	1	0.07555	0.999263	no	UDP-glucoronosyl/UDP-glucosyl transferase family protein
XLOC_006376	Prupe.2G106800	Pp02:16454871-16458627	G	F	OK	98.3496	134.82	0.455048	-1.76052	1	0.0757	0.999263	no	hydrolase, acting on ester bonds
XLOC_024532	Prupe.8G131900	Pp08:15427661-15429897	G	F	OK	4.11205	2.75236	-0.579185	1.77458	1	0.0758	0.999263	no	CYCD3;2 (CYCLIN D3;2); cyclin-dependent protein kinase
XLOC_012888	Prupe.4G127900	Pp04:7028561-7031171	G	F	OK	5.87803	4.0324	-0.543693	1.76447	1	0.07595	0.999263	no	unknown protein
XLOC_024089	Prupe.8G050000	Pp08:5442812-5447971	G	F	OK	0.760967	0.477061	-0.673661	1.80955	1	0.07595	0.999263	no	NA
XLOC_005748	Prupe.1G576300	Pp01:46930764-46934780	G	F	OK	7.67325	10.7517	0.486653	-1.77476	1	0.0761	0.999263	no	NA
XLOC_009697	Prupe.3G118900	Pp03:10314538-10319446	G	F	OK	0.494617	0.125119	-1.98302	2.19193	1	0.0761	0.999263	no	NA
XLOC_012590	Prupe.4G070100	Pp04:3434511-3437453	G	F	OK	0.233911	0.059498	-1.97505	2.18312	1	0.0761	0.999263	no	ATNRT1:2 (ARABIDOPSIS THALIANA NITRATE TRANSPORTER 1:2); calcium ion binding / transporter
XLOC_017284	Prupe.5G199200	Pp05:16044492-16046843	G	F	OK	0.99877	0.438038	-1.1891	1.8518	1	0.0762	0.999263	no	unknown protein
XLOC_007848	Prupe.2G063600	Pp02:8502956-8510185	G	F	OK	0.202275	0.403052	0.994653	-1.80304	1	0.07655	0.999263	no	NA
XLOC_005080	Prupe.1G436200	Pp01:37215774-37218139	G	F	OK	3.6165	2.4341	-0.571208	1.74306	1	0.0766	0.999263	no	transferase, transferring glycosyl groups
XLOC_002568	Prupe.1G493200	Pp01:40986085-41000567	G	F	OK	24.6333	17.6391	-0.481833	1.73095	1	0.0768	0.999263	no	binding
XLOC_014837	Prupe.4G235700	Pp04:15261434-15267501	G	F	OK	3.17645	4.51525	0.507388	-1.73285	1	0.07685	0.999263	no	TT7 (TRANSPARENT TESTA 7); flavonoid 3'-monooxygenase/ oxygen binding
XLOC_001333	Prupe.1G258200	Pp01:26806570-26809549	G	F	OK	4.0691	2.75698	-0.56162	1.69894	1	0.077	0.999263	no	protein kinase family protein
XLOC_005797	Prupe.1G586000	Pp01:47574693-47577403	G	F	OK	2.01047	1.31083	-0.617057	1.76754	1	0.0771	0.999263	no	AtHB31 (ARABIDOPSIS THALIANA HOMEOBOX PROTEIN 31); DNA binding / transcription factor
XLOC_000228	Prupe.1G039900	Pp01:2842125-2843564	G	F	OK	107.663	147.207	0.451318	-1.76786	1	0.07715	0.999263	no	ATGSTU7 (ARABIDOPSIS THALIANA GLUTATHIONE S-TRANSFERASE TAU 7); glutathione transferase
XLOC_009010	Prupe.2G314200	Pp02:29564500-29566513	G	F	OK	2.60105	1.6561	-0.651306	1.77495	1	0.07735	0.999263	no	catalytic/ cation binding / hydrolase, hydrolyzing O-glycosyl compounds
XLOC_024526	Prupe.8G131000	Pp08:15358145-15360389	G	F	OK	2.39805	3.5616	0.570664	-1.7264	1	0.0774	0.999263	no	UGT73B3 (UDP-glucosyl transferase 73B3); UDP-glycosyltransferase/ abscisic acid glucosyltransferase/ quercetin 3-O-glucosyltransferase/ transferase, transferring hexosyl groups
XLOC_014762	Prupe.4G220300	Pp04:13839439-13840514	G	F	OK	17.1023	24.0751	0.49335	-1.78078	1	0.07745	0.999263	no	NA
XLOC_018981	Prupe.6G289100	Pp06:26710539-26712602	G	F	OK	0.100262	0.286697	1.51575	-1.91587	1	0.07775	0.999263	no	curculin-like (mannose-binding) lectin family protein / PAN domain-containing protein
XLOC_024852	Prupe.8G198400	Pp08:18897511-18899623	G	F	OK	1.85958	1.11125	-0.742795	1.78588	1	0.07775	0.999263	no	NA
XLOC_006048	Prupe.2G046700	Pp02:5408586-5413667	G	F	OK	1.88185	1.29232	-0.542189	1.74691	1	0.0778	0.999263	no	disease resistance protein (NBS-LRR class), putative
XLOC_003177	Prupe.1G025000	Pp01:1734683-1735081	G	F	OK	2.9061	5.72178	0.977378	-1.80787	1	0.07785	0.999263	no	RNA recognition motif (RRM)-containing protein
XLOC_020760	Prupe.6G286500	Pp06:26526813-26534538	G	F	OK	16.5511	12.0752	-0.454877	1.77804	1	0.07785	0.999263	no	SCAR2 (SCAR HOMOLOG 2)
XLOC_010478	Prupe.3G265800	Pp03:24933871-24936121	G	F	OK	19.6034	13.9664	-0.489144	1.72655	1	0.0779	0.999263	no	ATEXPA15 (ARABIDOPSIS THALIANA EXPANSIN A15)
XLOC_026392	Prupe.8G244200	Pp08:21275308-21275785	G	F	OK	5.21668	16.7769	1.68527	-1.98896	1	0.078	0.999263	no	RTFL14 (ROTUNDIFOLIA LIKE 14)
XLOC_001863	Prupe.1G358300	Pp01:33149987-33154783	G	F	OK	31.2801	22.4909	-0.475906	1.73949	1	0.07815	0.999263	no	high mobility group (HMG1/2) family protein / ARID/BRIGHT DNA-binding domain-containing protein
XLOC_003624	Prupe.1G127200	Pp01:9984196-9985138	G	F	OK	0.0953658	0.915956	3.26373	-2.95677	1	0.07825	0.999263	no	MLP423 (MLP-LIKE PROTEIN 423)
XLOC_009615	Prupe.3G103200	Pp03:8097110-8098590	G	F	OK	62.9269	45.8273	-0.457471	1.76821	1	0.07825	0.999263	no	NA
XLOC_013933	Prupe.4G033200	Pp04:1548531-1552419	G	F	OK	1.98563	1.318	-0.591244	1.74797	1	0.0783	0.999263	no	B120; ATP binding / protein kinase/ protein serine/threonine kinase/ sugar binding
XLOC_012382	Prupe.4G033400	Pp04:1557800-1558540	G	F	OK	1.51094	2.78538	0.88243	-1.80982	1	0.07835	0.999263	no	calcium-binding EF hand family protein
XLOC_021496	Prupe.7G062700	Pp07:10160263-10161505	G	F	OK	0.460508	0.139889	-1.71894	2.01623	1	0.07835	0.999263	no	disease resistance protein (NBS-LRR class), putative
XLOC_001999	Prupe.1G385400	Pp01:34528817-34531152	G	F	OK	12.958	9.31655	-0.475981	1.76321	1	0.0784	0.999263	no	NA
XLOC_011647	Prupe.3G185700	Pp03:20027969-20030182	G	F	OK	3.06707	1.97585	-0.634388	1.72864	1	0.07855	0.999263	no	pectinesterase family protein
XLOC_006000	Prupe.2G037800	Pp02:4068263-4073978	G	F	OK	3.37908	2.40835	-0.488585	1.70966	1	0.07865	0.999263	no	disease resistance protein (NBS-LRR class), putative
XLOC_008612	Prupe.2G227200	Pp02:25313757-25315422	G	F	OK	4.20339	2.54372	-0.724611	1.78964	1	0.07865	0.999263	no	Overexpression leads to PEL (Pseudo-Etiolation in Light) phenotype.
XLOC_016913	Prupe.5G121900	Pp05:12127769-12130382	G	F	OK	0.500305	0.953368	0.930225	-1.79755	1	0.07865	0.999263	no	NA
XLOC_002780	Prupe.1G535700	Pp01:43769317-43795882	G	F	OK	9.67911	7.10558	-0.445923	1.70737	1	0.0787	0.999263	no	SAB (SABRE)
XLOC_024090	Prupe.8G050100	Pp08:5450908-5452155	G	F	OK	4.15864	6.5184	0.648407	-1.79588	1	0.0787	0.999263	no	FUNCTIONS IN: molecular_function unknown; INVOLVED IN: biological_process unknown; LOCATED IN: endomembrane system; EXPRESSED IN: 13 plant structures; EXPRESSED DURING: 9 growth stages; BEST Arabidopsis thaliana protein match is: EPF1 (EPIDERMAL PATTERNING FACTOR 1) (TAIR:AT2G20875.1); Has 12 Blast hits to 12 proteins in 4 species: Archae - 0; Bacteria - 0; Metazoa - 0; Fungi - 0; Plants - 12; Vi…
XLOC_006050	Prupe.2G046900	Pp02:5445797-5452769	G	F	OK	6.50892	4.7335	-0.459509	1.75406	1	0.0788	0.999263	no	disease resistance protein (NBS-LRR class), putative
XLOC_004615	Prupe.1G330800	Pp01:31360036-31362451	G	F	OK	173.115	125.438	-0.464755	1.76294	1	0.0789	0.999263	no	pectinesterase family protein
XLOC_001966	Prupe.1G380200	Pp01:34299923-34304985	G	F	OK	3.33052	2.32308	-0.519709	1.77184	1	0.07915	0.999263	no	unknown protein
XLOC_015713	Prupe.5G116600	Pp05:11855673-11856963	G	F	OK	21.4613	29.9987	0.483163	-1.76492	1	0.0793	0.999263	no	dihydroflavonol 4-reductase family / dihydrokaempferol 4-reductase family
XLOC_023972	Prupe.8G027300	Pp08:2503691-2507350	G	F	OK	9.6562	7.00467	-0.463138	1.71812	1	0.0793	0.999263	no	disease resistance protein (TIR-NBS-LRR class), putative
XLOC_017625	Prupe.6G022400	Pp06:1798906-1800144	G	F	OK	3.13897	1.94681	-0.68918	1.77456	1	0.07945	0.999263	no	leucine-rich repeat family protein
XLOC_005302	Prupe.1G481600	Pp01:40199363-40203910	G	F	OK	0.634328	1.06581	0.74865	-1.76713	1	0.0795	0.999263	no	leucine-rich repeat family protein / protein kinase family protein
XLOC_014901	Prupe.4G249100	Pp04:16652539-16652996	G	F	OK	29.4906	42.476	0.526392	-1.75293	1	0.07955	0.999263	no	unknown protein
XLOC_011942	Prupe.3G256400	Pp03:24457063-24457299	G	F	OK	13.9668	30.1907	1.1121	-1.85576	1	0.0796	0.999263	no	unknown protein
XLOC_020437	Prupe.6G219700	Pp06:22581923-22584816	G	F	OK	42.8191	58.5483	0.45137	-1.67644	1	0.0797	0.999263	no	FRO1 (FROSTBITE1); NADH dehydrogenase (ubiquinone)
XLOC_010420	Prupe.3G254800	Pp03:24360242-24364977	G	F	OK	20.7667	28.4517	0.454242	-1.71323	1	0.07975	0.999263	no	CRR7 (CHLORORESPIRATORY REDUCTION 7)
XLOC_018635	Prupe.6G221800	Pp06:22697506-22704065	G	F	OK	4.08195	2.92463	-0.481005	1.71379	1	0.0799	0.999263	no	ACA2 (CALCIUM ATPASE 2); calcium ion transmembrane transporter/ calcium-transporting ATPase/ calmodulin binding
XLOC_004874	Prupe.1G387000	Pp01:34651325-34653407	G	F	OK	0.149267	0.357978	1.26197	-1.86274	1	0.08	0.999263	no	CYP82C2; electron carrier/ heme binding / iron ion binding / monooxygenase/ oxygen binding
XLOC_002282	Prupe.1G435900	Pp01:37201366-37203304	G	F	OK	133.081	181.714	0.449358	-1.75476	1	0.0802	0.999263	no	LHCA5; pigment binding
XLOC_023979	Prupe.8G028600	Pp08:2587052-2588453	G	F	OK	1.65642	0.960755	-0.785824	1.75549	1	0.0804	0.999263	no	transcription factor
XLOC_004753	Prupe.1G361800	Pp01:33292868-33296561	G	F	OK	0.0563448	0.205217	1.8648	-1.61057	1	0.08045	0.999263	no	family II extracellular lipase 3 (EXL3)
XLOC_023311	Prupe.7G163200	Pp07:16830462-16832852	G	F	OK	12.5108	18.3748	0.55455	-1.72246	1	0.0806	0.999263	no	ATTRX1; oxidoreductase, acting on sulfur group of donors, disulfide as acceptor
XLOC_009242	Prupe.3G033500	Pp03:2469911-2471532	G	F	OK	0.434838	0.942321	1.11574	-1.80873	1	0.0807	0.999263	no	GLIP1 (GDSL LIPASE1); carboxylesterase/ lipase
XLOC_011444	Prupe.3G145900	Pp03:15934103-15939896	G	F	OK	0.0971886	0.325471	1.74367	-1.92973	1	0.0808	0.999263	no	NA
XLOC_012016	Prupe.3G271600	Pp03:25232156-25234530	G	F	OK	0.0660715	0.221801	1.74716	-1.9336	1	0.0808	0.999263	no	lyase/ pectate lyase
XLOC_007655	Prupe.2G017300	Pp02:1619010-1624557	G	F	OK	18.8648	13.9031	-0.440292	1.71736	1	0.08085	0.999263	no	unknown protein
XLOC_002982	Prupe.1G572300	Pp01:46660430-46662036	G	F	OK	0.760755	0.371595	-1.0337	1.7982	1	0.0809	0.999263	no	unknown protein
XLOC_008040	Prupe.2G101300	Pp02:15719506-15723356	G	F	OK	41.0008	56.6261	0.465814	-1.76765	1	0.0809	0.999263	no	calcium-binding EF hand family protein
XLOC_021715	Prupe.7G102800	Pp07:13231559-13233487	G	F	OK	82.9562	113.387	0.450835	-1.75774	1	0.08095	0.999263	no	UBQ1 (UBIQUITIN EXTENSION PROTEIN 1); protein binding / structural constituent of ribosome
XLOC_016715	Prupe.5G081800	Pp05:9504563-9507021	G	F	OK	2.90507	1.89912	-0.61324	1.74593	1	0.08115	0.999263	no	F-box family protein
XLOC_005817	Prupe.2G001300	Pp02:225713-228029	G	F	OK	4.70612	3.24679	-0.535527	1.74142	1	0.0813	0.999263	no	unknown protein
XLOC_019812	Prupe.6G089000	Pp06:6095492-6096735	G	F	OK	1.72911	0.89548	-0.949293	1.79373	1	0.08135	0.999263	no	FUNCTIONS IN: molecular_function unknown; INVOLVED IN: biological_process unknown; LOCATED IN: endomembrane system; CONTAINS InterPro DOMAIN/s: Lipase/lipooxygenase, PLAT/LH2 (InterPro:IPR008976), Embryo-specific 3 (InterPro:IPR010417); BEST Arabidopsis thaliana protein match is: embryo-specific protein-related (TAIR:AT5G62200.1); Has 60 Blast hits to 60 proteins in 11 species: Archae - 0; Bacter…
XLOC_019428	Prupe.6G014900	Pp06:1083581-1086636	G	F	OK	0.0897885	0.211204	1.23404	-1.55958	1	0.08155	0.999263	no	proton-dependent oligopeptide transport (POT) family protein
XLOC_017664	Prupe.6G030500	Pp06:2385786-2386728	G	F	OK	24.8012	35.0582	0.499339	-1.7605	1	0.0816	0.999263	no	NA
XLOC_021436	Prupe.7G050900	Pp07:8812100-8813486	G	F	OK	0.575088	1.1112	0.95026	-1.77699	1	0.0816	0.999263	no	PR5 (PATHOGENESIS-RELATED GENE 5)
XLOC_010497	Prupe.3G269400	Pp03:25110141-25117480	G	F	OK	17.7722	13.1385	-0.435815	1.70829	1	0.0819	0.999263	no	ABCB19; ATPase, coupled to transmembrane movement of substances / auxin efflux transmembrane transporter
XLOC_016750	Prupe.5G089400	Pp05:10014834-10017090	G	F	OK	0.28018	0.115047	-1.28413	1.82919	1	0.08205	0.999263	no	NA
XLOC_024816	Prupe.8G192100	Pp08:18624650-18627883	G	F	OK	4.24027	2.91694	-0.539697	1.74322	1	0.0821	0.999263	no	NS2; asparagine-tRNA ligase
XLOC_001950	Prupe.1G376400	Pp01:34110834-34113473	G	F	OK	7.02091	4.83809	-0.53722	1.68768	1	0.08225	0.999263	no	DFR (DIHYDROFLAVONOL 4-REDUCTASE); dihydrokaempferol 4-reductase
XLOC_005450	Prupe.1G512000	Pp01:42142825-42157542	G	F	OK	16.9897	12.5625	-0.43554	1.68915	1	0.08225	0.999263	no	ACC1 (ACETYL-COENZYME A CARBOXYLASE 1); acetyl-CoA carboxylase
XLOC_021633	Prupe.7G089200	Pp07:12275776-12279195	G	F	OK	3.90029	2.64653	-0.55948	1.74447	1	0.0823	0.999263	no	ankyrin repeat family protein
XLOC_012683	Prupe.4G087500	Pp04:4294303-4300042	G	F	OK	0.391137	0.210479	-0.894	1.70452	1	0.08235	0.999263	no	ATBRCA1; ubiquitin-protein ligase
XLOC_012032	Prupe.3G274400	Pp03:25355074-25356216	G	F	OK	12.0955	8.38552	-0.528496	1.72686	1	0.0827	0.999263	no	pathogenesis-related thaumatin family protein
XLOC_008560	Prupe.2G215900	Pp02:24653798-24657154	G	F	OK	0.806766	1.40328	0.798578	-1.73464	1	0.08275	0.999263	no	ATP binding / RNA polymerase II transcription factor
XLOC_026113	Prupe.8G186600	Pp08:18394147-18395038	G	F	OK	0.0895595	0.629163	2.81252	-2.50469	1	0.0828	0.999263	no	leucine-rich repeat family protein / protein kinase family protein
XLOC_001094	Prupe.1G211000	Pp01:22441903-22447220	G	F	OK	1.73218	1.1685	-0.56794	1.73122	1	0.08295	0.999263	no	RBOHD (RESPIRATORY BURST OXIDASE HOMOLOGUE D); NAD(P)H oxidase
XLOC_008734	Prupe.2G254600	Pp02:26737802-26738513	G	F	OK	1.44592	0.672751	-1.10385	1.75652	1	0.08315	0.999263	no	NA
XLOC_001306	Prupe.1G253900	Pp01:26485526-26487783	G	F	OK	7.48418	11.0536	0.562603	-1.71383	1	0.08335	0.999263	no	unknown protein
XLOC_002776	Prupe.1G534900	Pp01:43707831-43709250	G	F	OK	9.37764	13.8001	0.557386	-1.71097	1	0.08355	0.999263	no	40S ribosomal protein S10 (RPS10A)
XLOC_004470	Prupe.1G298700	Pp01:29424279-29425084	G	F	OK	18.8804	26.5689	0.49285	-1.73376	1	0.08395	0.999263	no	GCN5-related N-acetyltransferase (GNAT) family protein
XLOC_016264	Prupe.5G227300	Pp05:17492013-17494251	G	F	OK	5.47469	8.22745	0.587668	-1.74398	1	0.084	0.999263	no	NA
XLOC_009983	Prupe.3G173600	Pp03:19107657-19109261	G	F	OK	11.058	15.4211	0.479811	-1.74028	1	0.0841	0.999263	no	NA
XLOC_011421	Prupe.3G141500	Pp03:15146103-15150712	G	F	OK	0.451271	0.264216	-0.772274	1.69802	1	0.08435	0.999263	no	disease resistance protein (NBS-LRR class), putative
XLOC_006552	Prupe.2G139100	Pp02:19642479-19643279	G	F	OK	0.258608	0.752129	1.54022	-1.872	1	0.0845	0.999263	no	NA
XLOC_015310	Prupe.5G040300	Pp05:4422701-4429435	G	F	OK	48.5813	65.9409	0.440773	-1.72122	1	0.0845	0.999263	no	unknown protein
XLOC_003466	Prupe.1G094200	Pp01:7304809-7308526	G	F	OK	1.03603	0.619111	-0.742798	1.67274	1	0.08465	0.999263	no	protein kinase family protein
XLOC_002285	Prupe.1G436500	Pp01:37227208-37227744	G	F	OK	0.700338	1.7254	1.30081	-1.81437	1	0.08465	0.999263	no	NA
XLOC_020505	Prupe.6G235400	Pp06:23639323-23642649	G	F	OK	13.4558	9.81581	-0.455046	1.72006	1	0.08465	0.999263	no	pal1 (Phe ammonia lyase 1); phenylalanine ammonia-lyase
XLOC_002337	Prupe.1G447400	Pp01:37823077-37825115	G	F	OK	0.256018	0.0818071	-1.64595	1.91238	1	0.0847	0.999263	no	zinc finger (GATA type) family protein
XLOC_007013	Prupe.2G225400	Pp02:25236132-25237810	G	F	OK	0.273265	0.0872847	-1.6465	1.91302	1	0.0847	0.999263	no	unknown protein
XLOC_014062	Prupe.4G062400	Pp04:2989762-2993284	G	F	OK	1.51041	2.35058	0.638072	-1.67904	1	0.08505	0.999263	no	myb family transcription factor
XLOC_001945	Prupe.1G375700	Pp01:34066072-34068506	G	F	OK	7.03298	9.99938	0.507701	-1.71844	1	0.0851	0.999263	no	JMT (JASMONIC ACID CARBOXYL METHYLTRANSFERASE); jasmonate O-methyltransferase
XLOC_011773	Prupe.3G216200	Pp03:21859171-21861175	G	F	OK	2.57774	1.54831	-0.735416	1.76717	1	0.08515	0.999263	no	NA
XLOC_004312	Prupe.1G265100	Pp01:27339772-27341713	G	F	OK	0.253859	0.086454	-1.55402	1.91117	1	0.0852	0.999263	no	protein kinase family protein
XLOC_007124	Prupe.2G245800	Pp02:26282475-26285556	G	F	OK	0.222746	0.0759063	-1.55311	1.91005	1	0.0852	0.999263	no	IRX12 (IRREGULAR XYLEM 12); laccase
XLOC_015248	Prupe.5G029000	Pp05:3415753-3421837	G	F	OK	7.38806	5.34712	-0.466434	1.71526	1	0.08525	0.999263	no	HB-7 (HOMEOBOX-7); DNA binding / transcription factor
XLOC_001788	Prupe.1G344600	Pp01:32276800-32278286	G	F	OK	230.362	312.832	0.441483	-1.72557	1	0.08555	0.999263	no	unknown protein
XLOC_022334	Prupe.7G220300	Pp07:19744343-19751320	G	F	OK	0.324719	0.176851	-0.876655	1.7239	1	0.08555	0.999263	no	ABC transporter family protein
XLOC_007456	Prupe.2G309900	Pp02:29344525-29353104	G	F	OK	5.80706	4.2644	-0.445466	1.68605	1	0.08565	0.999263	no	transcription factor jumonji (jmjC) domain-containing protein
XLOC_003625	Prupe.1G127400	Pp01:9997625-9998505	G	F	OK	0.213837	0.709676	1.73065	-1.91532	1	0.08575	0.999263	no	NA
XLOC_006011	Prupe.2G039600	Pp02:4270218-4272539	G	F	OK	2.80612	1.88574	-0.573442	1.70941	1	0.08575	0.999263	no	dynamin family protein
XLOC_001086	Prupe.1G209300	Pp01:22312515-22314568	G	F	OK	78.5272	105.765	0.429597	-1.67381	1	0.0859	0.999263	no	ribosomal protein L18 family protein
XLOC_012129	Prupe.3G294500	Pp03:26267828-26270513	G	F	OK	0.224254	0.449949	1.00463	-1.70741	1	0.08595	0.999263	no	GDSL-motif lipase/hydrolase family protein
XLOC_015007	Prupe.4G271400	Pp04:22126836-22140046	G	F	OK	1.44555	0.974776	-0.568478	1.69396	1	0.08605	0.999263	no	RECQ4A; ATP binding / ATP-dependent helicase/ helicase/ nucleic acid binding
XLOC_025305	Prupe.8G017800	Pp08:1650804-1652848	G	F	OK	124.66	169.571	0.443895	-1.7184	1	0.08615	0.999263	no	thylakoid lumenal 29.8 kDa protein
XLOC_026240	Prupe.8G212200	Pp08:19585562-19591215	G	F	OK	4.88244	3.47757	-0.489524	1.69861	1	0.08615	0.999263	no	ALE2 (Abnormal Leaf Shape 2); kinase
XLOC_023719	Prupe.7G248600	Pp07:21087634-21090856	G	F	OK	10.2176	7.47419	-0.451071	1.66392	1	0.08645	0.999263	no	DIN10 (DARK INDUCIBLE 10); hydrolase, hydrolyzing O-glycosyl compounds
XLOC_024088	Prupe.8G049900	Pp08:5440936-5442792	G	F	OK	0.591946	0.298639	-0.987063	1.75673	1	0.0866	0.999263	no	DNA-binding bromodomain-containing protein
XLOC_005314	Prupe.1G484400	Pp01:40347675-40354933	G	F	OK	12.749	9.4022	-0.439313	1.68532	1	0.08665	0.999263	no	TPR1 (TOPLESS-RELATED 1)
XLOC_025221	Prupe.8G000100	Pp08:9929-11684	G	F	OK	5.33124	3.49489	-0.609224	1.72342	1	0.08685	0.999263	no	transferase family protein
XLOC_023019	Prupe.7G097300	Pp07:12869628-12870102	G	F	OK	9.34986	14.5645	0.639438	-1.7296	1	0.0869	0.999263	no	NA
XLOC_010074	Prupe.3G193600	Pp03:20513152-20514299	G	F	OK	26.2826	36.1883	0.461417	-1.69755	1	0.087	0.999263	no	NA
XLOC_025754	Prupe.8G112500	Pp08:14117405-14135673	G	F	OK	11.2377	8.28507	-0.439763	1.71761	1	0.08715	0.999263	no	TOR (TARGET OF RAPAMYCIN); 1-phosphatidylinositol-3-kinase/ protein binding
XLOC_004534	Prupe.1G311800	Pp01:30247167-30250174	G	F	OK	217.62	294.338	0.435658	-1.64265	1	0.0872	0.999263	no	RPL15; structural constituent of ribosome
XLOC_004848	Prupe.1G380100	Pp01:34295676-34298297	G	F	OK	137.62	101.674	-0.436735	1.69974	1	0.0872	0.999263	no	NA
XLOC_026355	Prupe.8G235300	Pp08:20836792-20840506	G	F	OK	4.08228	2.87034	-0.50815	1.63622	1	0.0872	0.999263	no	ankyrin repeat family protein
XLOC_018172	Prupe.6G130200	Pp06:10112967-10113647	G	F	OK	0.202759	0.760909	1.90796	-2.01969	1	0.0873	0.999263	no	NA
XLOC_009510	Prupe.3G085000	Pp03:6266105-6269875	G	F	OK	1.32494	0.859686	-0.624047	1.7325	1	0.08735	0.999263	no	disease resistance protein (NBS-LRR class), putative
XLOC_023323	Prupe.7G165900	Pp07:16984205-16985320	G	F	OK	216.387	293.31	0.438815	-1.69778	1	0.08735	0.999263	no	lactoylglutathione lyase family protein / glyoxalase I family protein
XLOC_021445	Prupe.7G053700	Pp07:9212657-9215823	G	F	OK	11.2104	16.1259	0.524535	-1.70848	1	0.08745	0.999263	no	NA
XLOC_016535	Prupe.5G041600	Pp05:4553638-4553872	G	F	OK	103.179	151.666	0.555748	-1.71244	1	0.0875	0.999263	no	NA
XLOC_005179	Prupe.1G455800	Pp01:38253413-38255322	G	F	OK	3.38559	4.96404	0.552107	-1.72019	1	0.08755	0.999263	no	chaperone protein dnaJ-related
XLOC_007133	Prupe.2G247800	Pp02:26382179-26386468	G	F	OK	10.5686	7.60967	-0.473883	1.73594	1	0.08785	0.999263	no	AUX1 (AUXIN RESISTANT 1); amino acid transmembrane transporter/ auxin binding / auxin influx transmembrane transporter/ transporter
XLOC_017010	Prupe.5G144100	Pp05:13297451-13298395	G	F	OK	1.42201	3.08767	1.11859	-1.79157	1	0.08785	0.999263	no	ACP4 (acyl carrier protein 4); acyl carrier
XLOC_016526	Prupe.5G039600	Pp05:4387241-4389632	G	F	OK	20.8089	28.7525	0.466484	-1.67215	1	0.0879	0.999263	no	LOL1 (LSD ONE LIKE 1); DNA binding
XLOC_005339	Prupe.1G489300	Pp01:40735338-40743395	G	F	OK	9.05996	6.66852	-0.442139	1.66083	1	0.088	0.999263	no	NA
XLOC_009901	Prupe.3G158000	Pp03:17670730-17671356	G	F	OK	0.778511	0.151276	-2.36353	2.08319	1	0.088	0.999263	no	NA
XLOC_022847	Prupe.7G058100	Pp07:9732184-9760222	G	F	OK	18.0151	13.4177	-0.425067	1.66575	1	0.08815	0.999263	no	ATPase, coupled to transmembrane movement of substances / amino acid transmembrane transporter
XLOC_016417	Prupe.5G014600	Pp05:1606590-1611227	G	F	OK	12.4767	17.2382	0.46637	-1.65659	1	0.0883	0.999263	no	unknown protein
XLOC_010156	Prupe.3G206100	Pp03:21337761-21340722	G	F	OK	6.94964	4.92379	-0.497168	1.66022	1	0.0884	0.999263	no	NA
XLOC_014359	Prupe.4G126300	Pp04:6933596-6935081	G	F	OK	0.344539	0.702721	1.02828	-1.7685	1	0.0884	0.999263	no	CRR2 (CHLORORESPIRATORY REDUCTION 2)
XLOC_002500	Prupe.1G478700	Pp01:40051742-40053741	G	F	OK	7.21666	10.7634	0.576726	-1.7107	1	0.08845	0.999263	no	NA
XLOC_019052	Prupe.6G303200	Pp06:27471584-27474851	G	F	OK	6.88128	4.81155	-0.516174	1.70977	1	0.0885	0.999263	no	pectinacetylesterase, putative
XLOC_023510	Prupe.7G204200	Pp07:18925232-18927047	G	F	OK	0.371995	0.143868	-1.37053	1.79603	1	0.08865	0.999263	no	hydroxyproline-rich glycoprotein family protein
XLOC_017526	Prupe.6G000700	Pp06:159652-161420	G	F	OK	3.06542	2.02949	-0.594972	1.68654	1	0.0887	0.999263	no	pentatricopeptide (PPR) repeat-containing protein
XLOC_003844	Prupe.1G171000	Pp01:14216241-14220083	G	F	OK	4.48884	3.16431	-0.504455	1.63612	1	0.08875	0.999263	no	DC1 domain-containing protein
XLOC_004020	Prupe.1G204000	Pp01:20347990-20348416	G	F	OK	7.09454	11.5634	0.704784	-1.71245	1	0.08895	0.999263	no	ATEP3; chitinase
XLOC_007011	Prupe.2G224600	Pp02:25194146-25203525	G	F	OK	19.0954	14.2275	-0.424547	1.6602	1	0.089	0.999263	no	SAC3/GANP family protein
XLOC_014197	Prupe.4G093600	Pp04:4718426-4721238	G	F	OK	49.086	36.262	-0.436854	1.7082	1	0.08905	0.999263	no	WAK2; ATP binding / calcium ion binding / protein kinase/ protein serine/threonine kinase
XLOC_013018	Prupe.4G152000	Pp04:8690558-8705800	G	F	OK	4.01215	2.90404	-0.466317	1.70463	1	0.08915	0.999263	no	ATGSL04 (glucan synthase-like 4); 1,3-beta-glucan synthase/ transferase, transferring glycosyl groups
XLOC_000570	Prupe.1G104900	Pp01:8439445-8441477	G	F	OK	0.964677	0.511014	-0.916682	1.72649	1	0.08925	0.999263	no	NA
XLOC_015493	Prupe.5G075300	Pp05:8923049-8924805	G	F	OK	0.398238	0.756763	0.926211	-1.72696	1	0.08925	0.999263	no	unknown protein
XLOC_008644	Prupe.2G235100	Pp02:25734143-25735488	G	F	OK	0.135533	0.427392	1.65692	-1.82733	1	0.0894	0.999263	no	epsin N-terminal homology (ENTH) domain-containing protein / clathrin assembly protein-related
XLOC_011612	Prupe.3G180500	Pp03:19635019-19637783	G	F	OK	0.269758	0.116974	-1.20547	1.74188	1	0.0894	0.999263	no	protein kinase family protein
XLOC_002618	Prupe.1G503200	Pp01:41610655-41612462	G	F	OK	2.84254	1.78991	-0.667292	1.71135	1	0.08945	0.999263	no	pathogenesis-related thaumatin family protein
XLOC_001403	Prupe.1G271000	Pp01:27807999-27809070	G	F	OK	5.38727	3.5538	-0.600191	1.69617	1	0.08975	0.999263	no	NA
XLOC_014261	Prupe.4G102800	Pp04:5248817-5255645	G	F	OK	3.97262	2.79598	-0.50674	1.6498	1	0.08975	0.999263	no	subtilase family protein
XLOC_009526	Prupe.3G088200	Pp03:6559799-6570124	G	F	OK	39.7688	29.3036	-0.440559	1.68511	1	0.09	0.999263	no	SUS2 (ABNORMAL SUSPENSOR 2)
XLOC_002544	Prupe.1G488000	Pp01:40636060-40637946	G	F	OK	12.8626	9.06859	-0.504229	1.69405	1	0.09005	0.999263	no	BTB/POZ domain-containing protein
XLOC_013912	Prupe.4G029200	Pp04:1357501-1362751	G	F	OK	0.529366	0.300606	-0.81639	1.68265	1	0.09025	0.999263	no	ATK1 (ARABIDOPSIS THALIANA KINESIN 1); microtubule motor/ minus-end-directed microtubule motor
XLOC_006044	Prupe.2G046300	Pp02:5308863-5313947	G	F	OK	10.4725	7.69749	-0.444144	1.68638	1	0.0903	0.999263	no	disease resistance protein (NBS-LRR class), putative
XLOC_023695	Prupe.7G242600	Pp07:20811033-20813072	G	F	OK	0.607039	1.14874	0.920192	-1.7514	1	0.09035	0.999263	no	glycoside hydrolase family 28 protein / polygalacturonase (pectinase) family protein
XLOC_017538	Prupe.6G002700	Pp06:319942-323097	G	F	OK	136.631	184.765	0.435404	-1.66163	1	0.0905	0.999263	no	binding / protein binding
XLOC_018450	Prupe.6G185100	Pp06:19397889-19398380	G	F	OK	2.02862	0.885009	-1.19673	1.72717	1	0.0905	0.999263	no	NA
XLOC_006717	Prupe.2G167800	Pp02:21611402-21613727	G	F	OK	0.216837	0.0809546	-1.42143	1.78678	1	0.09055	0.999263	no	NA
XLOC_014627	Prupe.4G186400	Pp04:11087504-11091386	G	F	OK	3.44264	2.27586	-0.597102	1.70251	1	0.09055	0.999263	no	BGLU47 (Beta-glucosidase 47); catalytic/ cation binding / hydrolase, hydrolyzing O-glycosyl compounds
XLOC_016447	Prupe.5G022700	Pp05:2517100-2521725	G	F	OK	9.61941	13.3611	0.474022	-1.68814	1	0.09055	0.999263	no	NA
XLOC_012629	Prupe.4G077500	Pp04:3773309-3775270	G	F	OK	0.136698	0.567473	2.05356	-1.92242	1	0.09065	0.999263	no	NA
XLOC_006528	Prupe.2G135900	Pp02:19351254-19370742	G	F	OK	30.3961	22.6446	-0.42472	1.64157	1	0.09085	0.999263	no	transcriptional regulator-related
XLOC_023620	Prupe.7G227800	Pp07:20114216-20118312	G	F	OK	0.328595	0.174945	-0.909411	1.71279	1	0.09085	0.999263	no	copper-binding family protein
XLOC_005641	Prupe.1G553300	Pp01:45200660-45203840	G	F	OK	0.829341	0.340577	-1.28399	1.75078	1	0.09095	0.999263	no	NA
XLOC_015498	Prupe.5G075800	Pp05:8982626-8985763	G	F	OK	0.172813	0.443467	1.35961	-1.80566	1	0.09095	0.999263	no	AFO (ABNORMAL FLORAL ORGANS); protein binding / transcription factor/ transcription regulator
XLOC_024559	Prupe.8G138800	Pp08:15789134-15791433	G	F	OK	1.30742	2.34028	0.839959	-1.73114	1	0.09095	0.999263	no	tRNA synthetase class II (G, H, P and S) family protein
XLOC_003525	Prupe.1G104100	Pp01:8333548-8340267	G	F	OK	3.45227	2.47185	-0.481952	1.65294	1	0.0911	0.999263	no	PGP11 (P-GLYCOPROTEIN 11); ATPase, coupled to transmembrane movement of substances
XLOC_016058	Prupe.5G184400	Pp05:15320356-15328494	G	F	OK	5.03862	3.63685	-0.470339	1.66974	1	0.0911	0.999263	no	protein binding / zinc ion binding
XLOC_019021	Prupe.6G296700	Pp06:27106396-27111706	G	F	OK	1.86203	3.73854	1.0056	-1.69929	1	0.0912	0.999263	no	TUF (VACUOLAR ATP SYNTHASE SUBUNIT E1); proton-transporting ATPase, rotational mechanism
XLOC_008500	Prupe.2G203500	Pp02:23920847-23923178	G	F	OK	0.11873	0.324432	1.45024	-1.82374	1	0.0915	0.999263	no	nodulin MtN21 family protein
XLOC_025015	Prupe.8G231600	Pp08:20617833-20618852	G	F	OK	2085.69	2986.94	0.518144	-1.69553	1	0.0916	0.999263	no	PSBW (PHOTOSYSTEM II REACTION CENTER W)
XLOC_023831	Prupe.7G270500	Pp07:22181256-22184839	G	F	OK	67.1515	90.3217	0.427653	-1.65256	1	0.09175	0.999263	no	LOCATED IN: chloroplast; EXPRESSED IN: 21 plant structures; EXPRESSED DURING: 13 growth stages; CONTAINS InterPro DOMAIN/s: Thioredoxin-like fold (InterPro:IPR012336); BEST Arabidopsis thaliana protein match is: unknown protein (TAIR:AT4G28590.1); Has 865 Blast hits to 660 proteins in 98 species: Archae - 0; Bacteria - 14; Metazoa - 354; Fungi - 73; Plants - 57; Viruses - 25; Other Eukaryotes - 3…
XLOC_026066	Prupe.8G177100	Pp08:17886296-17888935	G	F	OK	2.25086	1.47833	-0.606505	1.68963	1	0.09205	0.999263	no	FMO1 (FLAVIN-DEPENDENT MONOOXYGENASE 1); FAD binding / NADP or NADPH binding / electron carrier/ flavin-containing monooxygenase/ monooxygenase/ oxidoreductase
XLOC_004626	Prupe.1G332600	Pp01:31501170-31506619	G	F	OK	0.474727	0.286862	-0.726741	1.62235	1	0.09215	0.999263	no	RDR1 (RNA-DEPENDENT RNA POLYMERASE 1); RNA-directed RNA polymerase/ nucleic acid binding
XLOC_025564	Prupe.8G073800	Pp08:10736998-10752290	G	F	OK	9.22328	6.77387	-0.4453	1.63388	1	0.09215	0.999263	no	NA
XLOC_021512	Prupe.7G066400	Pp07:10471571-10477943	G	F	OK	4.0849	2.93147	-0.478676	1.64155	1	0.0924	0.999263	no	PHD finger protein-related
XLOC_008962	Prupe.2G304400	Pp02:29063553-29067476	G	F	OK	13.3937	18.2445	0.445912	-1.61206	1	0.0925	0.999263	no	unknown protein
XLOC_011714	Prupe.3G204800	Pp03:21267235-21269277	G	F	OK	15.1624	21.1657	0.481229	-1.6491	1	0.0925	0.999263	no	unknown protein
XLOC_025660	Prupe.8G092600	Pp08:12534606-12537022	G	F	OK	1.2107	1.86936	0.6267	-1.67573	1	0.0926	0.999263	no	BCS1 (CYTOCHROME BC1 SYNTHESIS); ATP binding / ATPase/ nucleoside-triphosphatase/ nucleotide binding
XLOC_014786	Prupe.4G225100	Pp04:14163700-14166350	G	F	OK	24.6761	34.2234	0.471867	-1.70508	1	0.0928	0.999263	no	ATP synthase subunit H family protein
XLOC_024928	Prupe.8G214000	Pp08:19677312-19684961	G	F	OK	12.7791	9.53565	-0.422379	1.64286	1	0.0928	0.999263	no	PDR12 (PLEIOTROPIC DRUG RESISTANCE 12); ATPase, coupled to transmembrane movement of substances
XLOC_006105	Prupe.2G054700	Pp02:6460426-6466614	G	F	OK	3.93326	2.83987	-0.4699	1.68354	1	0.09295	0.999263	no	disease resistance protein (NBS-LRR class), putative
XLOC_011580	Prupe.3G174700	Pp03:19181947-19183068	G	F	OK	895.957	1254.53	0.485649	-1.67266	1	0.093	0.999263	no	CAB1 (CHLOROPHYLL A/B BINDING PROTEIN 1); chlorophyll binding
XLOC_005927	Prupe.2G023700	Pp02:2322604-2327183	G	F	OK	1.69206	1.08932	-0.635344	1.64366	1	0.09315	0.999263	no	scpl40 (serine carboxypeptidase-like 40); serine-type carboxypeptidase
XLOC_019446	Prupe.6G017500	Pp06:1284715-1287139	G	F	OK	0.675701	0.383452	-0.817338	1.68482	1	0.09325	0.999263	no	NA
XLOC_019827	Prupe.6G092700	Pp06:6390122-6391894	G	F	OK	116.092	155.783	0.42427	-1.65795	1	0.09345	0.999263	no	40S ribosomal protein S23 (RPS23B)
XLOC_023313	Prupe.7G163600	Pp07:16853453-16859419	G	F	OK	0.988149	0.587017	-0.751326	1.64162	1	0.09365	0.999263	no	STY1 (STYLISH 1); protein heterodimerization/ transcription factor
XLOC_000833	Prupe.1G153300	Pp01:12089213-12091842	G	F	OK	21.7185	32.3704	0.575753	-1.62831	1	0.09375	0.999263	no	unknown protein
XLOC_014119	Prupe.4G076000	Pp04:3715914-3717804	G	F	OK	2.75205	1.81941	-0.597033	1.68513	1	0.09375	0.999263	no	pentatricopeptide (PPR) repeat-containing protein
XLOC_016365	Prupe.5G002400	Pp05:388506-394285	G	F	OK	10.2262	7.57909	-0.432179	1.63237	1	0.09375	0.999263	no	FUNCTIONS IN: molecular_function unknown; INVOLVED IN: biological_process unknown; LOCATED IN: plasma membrane, vacuole; EXPRESSED IN: guard cell, cultured cell; BEST Arabidopsis thaliana protein match is: PPI1 (PROTON PUMP INTERACTOR 1); protein binding (TAIR:AT4G27500.1); Has 53409 Blast hits to 33585 proteins in 1572 species: Archae - 464; Bacteria - 7066; Metazoa - 25076; Fungi - 5173; Plants…
XLOC_022192	Prupe.7G193700	Pp07:18416979-18418060	G	F	OK	7.23219	4.95304	-0.546119	1.66159	1	0.0938	0.999263	no	invertase/pectin methylesterase inhibitor family protein
XLOC_024564	Prupe.8G139400	Pp08:15825870-15830421	G	F	OK	3.58486	6.09208	0.76502	-1.6462	1	0.09385	0.999263	no	VEP1 (VEIN PATTERNING 1); binding / catalytic
XLOC_004167	Prupe.1G233000	Pp01:24770633-24772635	G	F	OK	3.63698	5.74305	0.659079	-1.6908	1	0.0939	0.999263	no	FUNCTIONS IN: molecular_function unknown; INVOLVED IN: biological_process unknown; LOCATED IN: endomembrane system; EXPRESSED IN: 9 plant structures; EXPRESSED DURING: 4 anthesis, C globular stage, petal differentiation and expansion stage, D bilateral stage; CONTAINS InterPro DOMAIN/s: Acid phosphatase/vanadium-dependent haloperoxidase related (InterPro:IPR003832); BEST Arabidopsis thaliana prot…
XLOC_013610	Prupe.4G260900	Pp04:18878282-18883343	G	F	OK	11.3344	8.3497	-0.44091	1.67419	1	0.09425	0.999263	no	disease resistance protein (TIR-NBS-LRR class), putative
XLOC_014604	Prupe.4G180200	Pp04:10688180-10693660	G	F	OK	0.246164	0.108693	-1.17936	1.73633	1	0.0944	0.999263	no	dynamin family protein
XLOC_005232	Prupe.1G467200	Pp01:38930116-38935462	G	F	OK	0.430044	0.207918	-1.04847	1.75463	1	0.09465	0.999263	no	CYCA2;1 (cyclin a2;1); cyclin-dependent protein kinase regulator
XLOC_023289	Prupe.7G156100	Pp07:16494436-16496159	G	F	OK	164.684	220.556	0.421445	-1.64276	1	0.0948	0.999263	no	ATRL1 (ARABIDOPSIS RAD-LIKE 1); DNA binding / transcription factor
XLOC_016371	Prupe.5G005500	Pp05:634358-636669	G	F	OK	52.0822	69.8345	0.423149	-1.63526	1	0.0949	0.999263	no	oxygen-evolving complex-related
XLOC_018752	Prupe.6G242800	Pp06:24109331-24111816	G	F	OK	90.6223	121.724	0.425675	-1.66644	1	0.0949	0.999263	no	unknown protein
XLOC_022470	Prupe.7G247800	Pp07:21041783-21046678	G	F	OK	1.87441	1.1941	-0.650511	1.59971	1	0.09505	0.999263	no	FUNCTIONS IN: molecular_function unknown; INVOLVED IN: biological_process unknown; LOCATED IN: cellular_component unknown; CONTAINS InterPro DOMAIN/s: Protein of unknown function DUF250 (InterPro:IPR004853); BEST Arabidopsis thaliana protein match is: UDP-glucuronic acid/UDP-N-acetylgalactosamine transporter-related (TAIR:AT4G31600.1); Has 1302 Blast hits to 1300 proteins in 174 species: Archae -…
XLOC_024769	Prupe.8G182200	Pp08:18182933-18192814	G	F	OK	12.9333	9.60732	-0.428887	1.63859	1	0.0951	0.999263	no	guanine nucleotide exchange family protein
XLOC_013726	Prupe.4G282200	Pp04:24061624-24069503	G	F	OK	8.59205	6.30791	-0.445839	1.62789	1	0.0952	0.999263	no	ATDGK2 (Diacylglycerol kinase 2); diacylglycerol kinase
XLOC_003697	Prupe.1G143100	Pp01:11250896-11257242	G	F	OK	1.17082	0.783793	-0.578972	1.67745	1	0.09525	0.999263	no	EMB3013 (embryo defective 3013); ATP binding / binding / kinase/ protein kinase/ protein serine/threonine kinase
XLOC_015211	Prupe.5G021900	Pp05:2407658-2413641	G	F	OK	1.66841	1.04076	-0.68084	1.65605	1	0.0953	0.999263	no	BRX (BREVIS RADIX); identical protein binding / water channel
XLOC_020732	Prupe.6G281600	Pp06:26298417-26298978	G	F	OK	1.73537	0.773346	-1.16606	1.71455	1	0.09545	0.999263	no	basic helix-loop-helix (bHLH) family protein
XLOC_003723	Prupe.1G148300	Pp01:11621063-11627392	G	F	OK	32.2083	23.969	-0.426264	1.65936	1	0.0956	0.999263	no	NA
XLOC_024123	Prupe.8G055300	Pp08:6456751-6461528	G	F	OK	10.6984	14.817	0.469849	-1.64706	1	0.0958	0.999263	no	NA
XLOC_004655	Prupe.1G338800	Pp01:31899029-31902963	G	F	OK	3.63516	2.59311	-0.487334	1.65821	1	0.0959	0.999263	no	BRL2 (BRI1-LIKE 2); ATP binding / protein serine/threonine kinase/ transmembrane receptor protein serine/threonine kinase
XLOC_022469	Prupe.7G247600	Pp07:21032235-21033784	G	F	OK	0.97672	0.526194	-0.89235	1.67918	1	0.096	0.999263	no	AtMYB82 (myb domain protein 82); DNA binding / transcription factor
XLOC_020680	Prupe.6G270600	Pp06:25678591-25678930	G	F	OK	23.5324	35.3418	0.586728	-1.67454	1	0.0962	0.999263	no	unknown protein
XLOC_021997	Prupe.7G157600	Pp07:16565184-16571404	G	F	OK	11.6659	8.63433	-0.434138	1.68319	1	0.09625	0.999263	no	heat shock protein binding
XLOC_026230	Prupe.8G210200	Pp08:19492179-19493248	G	F	OK	2.89207	4.50528	0.639514	-1.67425	1	0.09625	0.999263	no	ATGSTU7 (ARABIDOPSIS THALIANA GLUTATHIONE S-TRANSFERASE TAU 7); glutathione transferase
XLOC_010763	Prupe.3G002800	Pp03:186222-192239	G	F	OK	21.0383	15.7742	-0.415446	1.61826	1	0.0964	0.999263	no	protein transport protein-related
XLOC_013917	Prupe.4G030800	Pp04:1427557-1429125	G	F	OK	34.5338	46.6026	0.432403	-1.6738	1	0.0965	0.999263	no	FUNCTIONS IN: molecular_function unknown; INVOLVED IN: biological_process unknown; LOCATED IN: cellular_component unknown; EXPRESSED IN: 22 plant structures; EXPRESSED DURING: 13 growth stages; BEST Arabidopsis thaliana protein match is: glycine-rich protein (TAIR:AT3G29075.1); Has 22740 Blast hits to 8622 proteins in 417 species: Archae - 22; Bacteria - 573; Metazoa - 11353; Fungi - 2147; Plants…
XLOC_003374	Prupe.1G074700	Pp01:5362773-5365595	G	F	OK	70.879	96.9268	0.451538	-1.6414	1	0.09655	0.999263	no	macrophage migration inhibitory factor family protein / MIF family protein
XLOC_015470	Prupe.5G070800	Pp05:8565573-8567837	G	F	OK	12.9777	9.49109	-0.451388	1.66911	1	0.09685	0.999263	no	aspartyl protease family protein
XLOC_007706	Prupe.2G028600	Pp02:2966693-2973892	G	F	OK	0.93776	0.564843	-0.731368	1.6616	1	0.097	0.999263	no	PAP27 (PURPLE ACID PHOSPHATASE 27); acid phosphatase/ protein serine/threonine phosphatase
XLOC_019963	Prupe.6G121000	Pp06:8998717-9001837	G	F	OK	12.3361	8.67665	-0.507672	1.64906	1	0.097	0.999263	no	unknown protein
XLOC_007723	Prupe.2G031300	Pp02:3390495-3391070	G	F	OK	0.156485	0.916344	2.54987	-2.24831	1	0.09705	0.999263	no	NA
XLOC_016902	Prupe.5G119500	Pp05:11989078-11991373	G	F	OK	1.53632	2.46798	0.683848	-1.67848	1	0.09705	0.999263	no	protein binding / zinc ion binding
XLOC_009988	Prupe.3G175200	Pp03:19217264-19217998	G	F	OK	1.30987	0.603567	-1.11784	1.7279	1	0.0972	0.999263	no	NA
XLOC_019775	Prupe.6G080300	Pp06:5466968-5469651	G	F	OK	0.640925	0.296944	-1.10997	1.67966	1	0.0974	0.999263	no	NA
XLOC_008663	Prupe.2G239100	Pp02:25947768-25953877	G	F	OK	6.12507	4.53944	-0.432212	1.63311	1	0.09755	0.999263	no	GN (GNOM); GTP:GDP antiporter/ protein homodimerization
XLOC_004716	Prupe.1G352900	Pp01:32812783-32814643	G	F	OK	2.9709	4.28944	0.529888	-1.6244	1	0.0978	0.999263	no	NA
XLOC_019469	Prupe.6G020200	Pp06:1610259-1615376	G	F	OK	14.0898	18.9526	0.427753	-1.66752	1	0.0978	0.999263	no	unknown protein
XLOC_019561	Prupe.6G040200	Pp06:3005499-3006483	G	F	OK	17.2923	24.2122	0.485599	-1.66725	1	0.09835	0.999263	no	NA
XLOC_003229	Prupe.1G041200	Pp01:2950826-2953530	G	F	OK	11.3287	15.483	0.450702	-1.61601	1	0.0985	0.999263	no	protein phosphatase 2C, putative / PP2C, putative
XLOC_024187	Prupe.8G066900	Pp08:9880647-9883376	G	F	OK	4.9158	6.9824	0.506296	-1.66867	1	0.0987	0.999263	no	oxidoreductase, 2OG-Fe(II) oxygenase family protein
XLOC_021191	Prupe.7G005000	Pp07:565647-578928	G	F	OK	26.2751	19.7176	-0.414216	1.5975	1	0.09875	0.999263	no	NA
XLOC_007872	Prupe.2G068000	Pp02:9713789-9715023	G	F	OK	0.348295	0.775057	1.15399	-1.73242	1	0.09885	0.999263	no	NA
XLOC_014906	Prupe.4G250700	Pp04:16766785-16767510	G	F	OK	1088.41	1495.63	0.458537	-1.63469	1	0.09885	0.999263	no	photosystem II 5 kD protein
XLOC_017372	Prupe.5G216600	Pp05:16980340-16980826	G	F	OK	4.54291	7.50343	0.723934	-1.67372	1	0.09885	0.999263	no	unknown protein
XLOC_019297	Prupe.6G354800	Pp06:30149235-30160989	G	F	OK	13.5807	10.1055	-0.426409	1.6476	1	0.0989	0.999263	no	PIR121; transcription activator
XLOC_000401	Prupe.1G070100	Pp01:4973918-4977504	G	F	OK	1.96358	1.32861	-0.563569	1.6534	1	0.09895	0.999263	no	SDE3 (SILENCING DEFECTIVE); RNA helicase
XLOC_005343	Prupe.1G490100	Pp01:40795460-40798000	G	F	OK	0.20363	0.441125	1.11524	-1.71846	1	0.09915	0.999263	no	BAT1 (BIDIRECTIONAL AMINO ACID TRANSPORTER 1); amino acid transmembrane transporter
XLOC_001097	Prupe.1G212000	Pp01:22503014-22507508	G	F	OK	3.39341	2.38282	-0.510067	1.60461	1	0.09925	0.999263	no	zinc finger (DHHC type) family protein
XLOC_021442	Prupe.7G052800	Pp07:9106720-9110580	G	F	OK	0.666321	0.341279	-0.965263	1.6858	1	0.0994	0.999263	no	ACA4 (ALPHA CARBONIC ANHYDRASE 4); carbonate dehydratase/ zinc ion binding
XLOC_026028	Prupe.8G170300	Pp08:17469402-17483747	G	F	OK	4.25346	3.17192	-0.42328	1.58366	1	0.0994	0.999263	no	ATRAD3; binding / inositol or phosphatidylinositol kinase/ phosphotransferase, alcohol group as acceptor / protein serine/threonine kinase
XLOC_015867	Prupe.5G145900	Pp05:13422785-13428395	G	F	OK	0.235719	0.127911	-0.881923	1.68077	1	0.0995	0.999263	no	ATP binding / DNA binding
XLOC_001564	Prupe.1G301700	Pp01:29654017-29656690	G	F	OK	9.22181	5.77072	-0.676299	1.6309	1	0.09955	0.999263	no	NA
XLOC_001352	Prupe.1G262400	Pp01:27102606-27107135	G	F	OK	1.91188	1.29077	-0.566754	1.62586	1	0.0996	0.999263	no	binding
XLOC_013703	Prupe.4G277600	Pp04:23239664-23246693	G	F	OK	31.8228	23.952	-0.409918	1.59759	1	0.0996	0.999263	no	heat shock protein binding
XLOC_011387	Prupe.3G132900	Pp03:13804144-13806781	G	F	OK	0.37878	0.169413	-1.16081	1.67533	1	0.09965	0.999263	no	reticulon family protein
XLOC_010245	Prupe.3G223400	Pp03:22341080-22348040	G	F	OK	0.681216	0.451299	-0.594031	1.64216	1	0.09965	0.999263	no	SUS2 (ABNORMAL SUSPENSOR 2)
XLOC_008914	Prupe.2G294600	Pp02:28624031-28625417	G	F	OK	18.1341	24.5536	0.437232	-1.5909	1	0.0997	0.999263	no	NA
XLOC_020556	Prupe.6G246000	Pp06:24286862-24289498	G	F	OK	3.1641	4.48989	0.504885	-1.64998	1	0.09975	0.999263	no	NA
XLOC_014445	Prupe.4G146400	Pp04:8399752-8403608	G	F	OK	3.96089	5.73677	0.534415	-1.60535	1	0.09985	0.999263	no	ATGSTU19 (GLUTATHIONE S-TRANSFERASE TAU 19); glutathione binding / glutathione transferase
XLOC_026467	Prupe.8G260500	Pp08:22035497-22037164	G	F	OK	15.3789	20.8855	0.441546	-1.65884	1	0.09995	0.999263	no	EID1 (EMPFINDLICHER IM DUNKELROTEN LICHT 1); ubiquitin-protein ligase
XLOC_010464	Prupe.3G262200	Pp03:24767605-24772469	G	F	OK	0.535151	0.313748	-0.77034	1.63107	1	0.1	0.999263	no	cdc2cAt (Arabidopsis thaliana cdc2c); ATP binding / kinase/ protein kinase/ protein serine/threonine kinase
XLOC_021717	Prupe.7G103800	Pp07:13336125-13338302	G	F	OK	9.40453	6.77963	-0.472149	1.65099	1	0.10005	0.999263	no	unknown protein
XLOC_005929	Prupe.2G023900	Pp02:2363172-2364569	G	F	OK	5.71707	3.82756	-0.57885	1.64415	1	0.1001	0.999263	no	NA
XLOC_006344	Prupe.2G101600	Pp02:15747080-15748241	G	F	OK	29.4848	40.2379	0.448582	-1.66092	1	0.1001	0.999263	no	ATGSTU8 (GLUTATHIONE S-TRANSFERASE TAU 8); glutathione transferase
XLOC_008111	Prupe.2G116800	Pp02:17486481-17487687	G	F	OK	10.4299	7.37623	-0.499771	1.62518	1	0.10025	0.999263	no	NA
XLOC_010274	Prupe.3G228900	Pp03:22749611-22948040	G	F	OK	0	0.279686	Inf	NA	1	0.10045	0.999263	no	NA
XLOC_025469	Prupe.8G050900	Pp08:5536734-5543874	G	F	OK	0.468389	0.286367	-0.709843	1.54931	1	0.10045	0.999263	no	FUNCTIONS IN: molecular_function unknown; INVOLVED IN: biological_process unknown; LOCATED IN: cellular_component unknown; EXPRESSED IN: 24 plant structures; EXPRESSED DURING: 14 growth stages; CONTAINS InterPro DOMAIN/s: Bromodomain (InterPro:IPR001487); BEST Arabidopsis thaliana protein match is: ATBET9 (Arabidopsis thaliana Bromodomain and Extraterminal Domain protein 9); DNA binding (TAIR:AT5…
XLOC_008913	Prupe.2G294300	Pp02:28609688-28616738	G	F	OK	0.601716	0.378671	-0.668138	1.68674	1	0.10055	0.999263	no	NA
XLOC_006925	Prupe.2G208300	Pp02:24161951-24166137	G	F	OK	49.689	67.6067	0.44424	-1.58399	1	0.1006	0.999263	no	unknown protein
XLOC_010833	Prupe.3G016800	Pp03:1198615-1201084	G	F	OK	33.6337	45.5286	0.436865	-1.60335	1	0.10065	0.999263	no	40S ribosomal protein S7 (RPS7A)
XLOC_006329	Prupe.2G097900	Pp02:15327866-15330225	G	F	OK	0.598329	0.976291	0.706374	-1.59489	1	0.10085	0.999263	no	phototropic-responsive NPH3 family protein
XLOC_010455	Prupe.3G260200	Pp03:24650368-24651770	G	F	OK	0.144195	0.375612	1.38122	-1.73338	1	0.10105	0.999263	no	GT72B1; UDP-glucosyltransferase/ UDP-glycosyltransferase/ transferase, transferring glycosyl groups
XLOC_022189	Prupe.7G193000	Pp07:18389439-18395454	G	F	OK	1.48662	0.791453	-0.909461	1.60251	1	0.10135	0.999263	no	respiratory burst oxidase protein E (RbohE) / NADPH oxidase
XLOC_003230	Prupe.1G041500	Pp01:2967908-2970182	G	F	OK	61.9875	82.5968	0.414108	-1.61186	1	0.1015	0.999263	no	60S ribosomal protein L14 (RPL14B)
XLOC_014907	Prupe.4G250800	Pp04:16777968-16782374	G	F	OK	5.6582	4.14685	-0.448329	1.64542	1	0.1015	0.999263	no	NA
XLOC_001119	Prupe.1G216700	Pp01:22989568-22990735	G	F	OK	218.892	293.048	0.420918	-1.62658	1	0.1016	0.999263	no	CCL (CCR-LIKE)
XLOC_022325	Prupe.7G218700	Pp07:19673982-19675427	G	F	OK	2.75645	4.31044	0.645028	-1.65458	1	0.1016	0.999263	no	NA
XLOC_002323	Prupe.1G443900	Pp01:37624914-37627881	G	F	OK	1.32124	0.74688	-0.822941	1.67571	1	0.10165	0.999263	no	AtAUR1 (ATAURORA1); histone kinase(H3-S10 specific) / kinase/ protein serine/threonine kinase
XLOC_012388	Prupe.4G034100	Pp04:1586052-1590183	G	F	OK	3.14853	2.22945	-0.497991	1.60917	1	0.1017	0.999263	no	unknown protein
XLOC_019027	Prupe.6G297400	Pp06:27158164-27166121	G	F	OK	8.4008	6.23599	-0.429909	1.63715	1	0.1017	0.999263	no	ATP binding / kinase/ protein serine/threonine kinase
XLOC_007720	Prupe.2G031000	Pp02:3374084-3375572	G	F	OK	2087.34	1480.62	-0.495464	1.63579	1	0.1018	0.999263	no	NA
XLOC_023249	Prupe.7G145200	Pp07:15881600-15884346	G	F	OK	48.1893	64.554	0.421794	-1.64449	1	0.10185	0.999263	no	HCF164; oxidoreductase, acting on sulfur group of donors, disulfide as acceptor
XLOC_006356	Prupe.2G103400	Pp02:15916722-15919259	G	F	OK	2.82682	1.93244	-0.548759	1.6426	1	0.1019	0.999263	no	NA
XLOC_012362	Prupe.4G029300	Pp04:1365076-1366413	G	F	OK	1390.01	1945.43	0.484996	-1.61559	1	0.102	0.999263	no	PSBQ-2; calcium ion binding
XLOC_017361	Prupe.5G214600	Pp05:16909426-16914607	G	F	OK	1.48008	1.00415	-0.559699	1.57597	1	0.102	0.999263	no	ATP binding / microtubule motor
XLOC_017870	Prupe.6G072000	Pp06:4908591-4910944	G	F	OK	1.31148	0.774467	-0.759917	1.63589	1	0.1021	0.999263	no	ZIP11 (ZINC TRANSPORTER 11 PRECURSOR); cation transmembrane transporter/ metal ion transmembrane transporter
XLOC_004768	Prupe.1G364300	Pp01:33485561-33487598	G	F	OK	30.2325	40.4404	0.419701	-1.62143	1	0.1023	0.999263	no	unknown protein
XLOC_012712	Prupe.4G091800	Pp04:4580446-4586453	G	F	OK	14.4632	10.835	-0.41669	1.59398	1	0.1023	0.999263	no	coatomer protein complex, subunit alpha, putative
XLOC_012394	Prupe.4G035000	Pp04:1640965-1663412	G	F	OK	13.2025	9.98137	-0.403504	1.5807	1	0.1026	0.999263	no	DEAD box RNA helicase, putative
XLOC_013908	Prupe.4G027100	Pp04:1255927-1258763	G	F	OK	1.78642	1.09546	-0.705538	1.60689	1	0.10275	0.999263	no	bacterial transferase hexapeptide repeat-containing protein
XLOC_001297	Prupe.1G252500	Pp01:26366380-26367827	G	F	OK	3.27319	2.15514	-0.602917	1.65928	1	0.10285	0.999263	no	NA
XLOC_002409	Prupe.1G462100	Pp01:38625212-38631654	G	F	OK	102.797	138.189	0.426848	-1.59007	1	0.10285	0.999263	no	plastid-lipid associated protein PAP-related / fibrillin-related
XLOC_014448	Prupe.4G147100	Pp04:8417313-8420648	G	F	OK	4.38056	6.18471	0.497592	-1.60202	1	0.10285	0.999263	no	ATGSTU19 (GLUTATHIONE S-TRANSFERASE TAU 19); glutathione binding / glutathione transferase
XLOC_026209	Prupe.8G205700	Pp08:19245491-19250004	G	F	OK	0.754228	1.4266	0.919509	-1.65265	1	0.10285	0.999263	no	NA
XLOC_018721	Prupe.6G236800	Pp06:23742503-23743435	G	F	OK	58.7511	78.6901	0.421567	-1.6396	1	0.10295	0.999263	no	60S ribosomal protein L12 (RPL12A)
XLOC_021144	Prupe.6G363600	Pp06:30547663-30558666	G	F	OK	10.4519	7.81207	-0.419986	1.59763	1	0.1032	0.999263	no	DCL2 (DICER-LIKE 2); ATP binding / ATP-dependent helicase/ RNA binding / double-stranded RNA binding / helicase/ nucleic acid binding / ribonuclease III
XLOC_003415	Prupe.1G085200	Pp01:6336307-6337335	G	F	OK	0.396661	0.10384	-1.93355	1.87028	1	0.1033	0.999263	no	NA
XLOC_003832	Prupe.1G169200	Pp01:13833178-13834603	G	F	OK	0.911689	1.50935	0.727315	-1.61567	1	0.10335	0.999263	no	IAGLU (INDOLE-3-ACETATE BETA-D-GLUCOSYLTRANSFERASE); UDP-glycosyltransferase/ transferase, transferring glycosyl groups
XLOC_022901	Prupe.7G069900	Pp07:10785424-10787390	G	F	OK	0.52007	0.255293	-1.02655	1.6803	1	0.10345	0.999263	no	pentatricopeptide (PPR) repeat-containing protein
XLOC_005413	Prupe.1G504800	Pp01:41716867-41719216	G	F	OK	258.283	345.53	0.419857	-1.55216	1	0.1035	0.999263	no	30S ribosomal protein S13, chloroplast (CS13)
XLOC_025752	Prupe.8G112200	Pp08:14108821-14109267	G	F	OK	7.389	11.5912	0.649575	-1.627	1	0.1035	0.999263	no	NA
XLOC_019020	Prupe.6G296600	Pp06:27102828-27105699	G	F	OK	0.85298	1.44715	0.762634	-1.60564	1	0.10365	0.999263	no	acid phosphatase class B family protein
XLOC_015823	Prupe.5G137800	Pp05:12982386-12985004	G	F	OK	14.2842	10.5971	-0.430747	1.62985	1	0.1038	0.999263	no	protein kinase family protein
XLOC_015971	Prupe.5G166700	Pp05:14424690-14430408	G	F	OK	2.87476	4.04948	0.494296	-1.5967	1	0.104	0.999263	no	copper amine oxidase, putative
XLOC_013851	Prupe.4G017500	Pp04:815500-817089	G	F	OK	4.19848	2.82643	-0.570885	1.63015	1	0.10405	0.999263	no	unknown protein
XLOC_019966	Prupe.6G121800	Pp06:9059968-9067644	G	F	OK	1.86503	1.31776	-0.501106	1.61836	1	0.10405	0.999263	no	PDR6; ATPase, coupled to transmembrane movement of substances
XLOC_017958	Prupe.6G089300	Pp06:6105521-6108709	G	F	OK	0.409727	0.201381	-1.02474	1.67733	1	0.10415	0.999263	no	LAC17 (laccase 17); laccase
XLOC_020521	Prupe.6G239800	Pp06:23901115-23904120	G	F	OK	3.45218	2.33563	-0.563692	1.64712	1	0.10415	0.999263	no	IRX9 (IRREGULAR XYLEM 9); transferase, transferring glycosyl groups / xylosyltransferase
XLOC_004887	Prupe.1G388700	Pp01:34736435-34739898	G	F	OK	4.1457	2.91474	-0.508248	1.61072	1	0.10435	0.999263	no	amino acid transporter family protein
XLOC_004746	Prupe.1G360200	Pp01:33231504-33236183	G	F	OK	20.1917	15.106	-0.418643	1.57764	1	0.10455	0.999263	no	DC1 domain-containing protein
XLOC_017708	Prupe.6G038200	Pp06:2875616-2878901	G	F	OK	8.10526	11.0958	0.453086	-1.64768	1	0.10455	0.999263	no	CYP714A1; electron carrier/ heme binding / iron ion binding / monooxygenase/ oxygen binding
XLOC_000464	Prupe.1G080700	Pp01:5921761-5923142	G	F	OK	1.04021	1.74973	0.750248	-1.61543	1	0.1046	0.999263	no	ATEP3; chitinase
XLOC_000666	Prupe.1G122900	Pp01:9637561-9639683	G	F	OK	33.7009	25.1749	-0.4208	1.61864	1	0.1046	0.999263	no	chitinase
XLOC_016219	Prupe.5G218800	Pp05:17101972-17104165	G	F	OK	164.233	122.254	-0.425859	1.61062	1	0.1046	0.999263	no	aspartyl protease family protein
XLOC_011741	Prupe.3G209200	Pp03:21490585-21495497	G	F	OK	8.36198	6.09121	-0.457115	1.56961	1	0.10465	0.999263	no	zinc finger (CCCH-type) family protein
XLOC_000949	Prupe.1G178400	Pp01:15304140-15307207	G	F	OK	214.688	158.366	-0.438981	1.62877	1	0.1047	0.999263	no	pectinesterase family protein
XLOC_007378	Prupe.2G294400	Pp02:28616923-28620296	G	F	OK	4.88093	3.55137	-0.458781	1.56041	1	0.10475	0.999263	no	LTI65 (LOW-TEMPERATURE-INDUCED 65)
XLOC_009190	Prupe.3G023100	Pp03:1701279-1709644	G	F	OK	12.6585	17.2702	0.44818	-1.60882	1	0.1049	0.999263	no	NA
XLOC_015661	Prupe.5G106700	Pp05:11270758-11272245	G	F	OK	1.04006	1.70305	0.711449	-1.59001	1	0.1049	0.999263	no	WRKY29; transcription factor
XLOC_016129	Prupe.5G199300	Pp05:16047443-16050791	G	F	OK	0.980647	0.601853	-0.704322	1.59613	1	0.1049	0.999263	no	NA
XLOC_026359	Prupe.8G235800	Pp08:20855524-20859243	G	F	OK	0.248576	0.100069	-1.3127	1.63705	1	0.1049	0.999263	no	phosphoinositide binding
XLOC_018749	Prupe.6G241200	Pp06:23986189-23990799	G	F	OK	9.13393	6.75493	-0.435296	1.55998	1	0.10505	0.999263	no	myosin heavy chain-related
XLOC_006255	Prupe.2G083200	Pp02:13207092-13210994	G	F	OK	0.488345	0.26335	-0.890918	1.63769	1	0.1051	0.999263	no	NA
XLOC_007765	Prupe.2G040800	Pp02:4470652-4483827	G	F	OK	26.59	20.1804	-0.397927	1.54435	1	0.10515	0.999263	no	KEG (KEEP ON GOING); protein binding / protein kinase/ ubiquitin-protein ligase
XLOC_020868	Prupe.6G309400	Pp06:27801694-27803481	G	F	OK	0.28647	0.586346	1.03337	-1.60515	1	0.10515	0.999263	no	AtGolS2 (Arabidopsis thaliana galactinol synthase 2); transferase, transferring glycosyl groups / transferase, transferring hexosyl groups
XLOC_023041	Prupe.7G102000	Pp07:13186994-13188904	G	F	OK	1.54605	2.42666	0.650381	-1.62462	1	0.1052	0.999263	no	anac090 (Arabidopsis NAC domain containing protein 90); transcription factor
XLOC_007578	Prupe.2G003100	Pp02:343662-346932	G	F	OK	26.7914	36.3069	0.438474	-1.61184	1	0.10535	0.999263	no	unknown protein
XLOC_000521	Prupe.1G092000	Pp01:6954788-6956325	G	F	OK	23.1518	31.2053	0.430666	-1.62411	1	0.10545	0.999263	no	FUNCTIONS IN: molecular_function unknown; INVOLVED IN: biological_process unknown; LOCATED IN: vacuole; EXPRESSED IN: 20 plant structures; EXPRESSED DURING: 13 growth stages; BEST Arabidopsis thaliana protein match is: transferase, transferring glycosyl groups (TAIR:AT4G14100.1); Has 63 Blast hits to 60 proteins in 11 species: Archae - 0; Bacteria - 0; Metazoa - 10; Fungi - 0; Plants - 51; Viruse…
XLOC_001941	Prupe.1G375000	Pp01:34034934-34039208	G	F	OK	5.61443	4.00946	-0.485732	1.5678	1	0.1057	0.999263	no	ethylene-responsive protein -related
XLOC_017218	Prupe.5G186600	Pp05:15432660-15435843	G	F	OK	5.83736	4.23904	-0.46158	1.62517	1	0.10575	0.999263	no	C2 domain-containing protein
XLOC_001755	Prupe.1G338700	Pp01:31888325-31891434	G	F	OK	17.4764	12.9598	-0.431366	1.62911	1	0.10585	0.999263	no	nucleic acid binding / transcription factor/ zinc ion binding
XLOC_000299	Prupe.1G051300	Pp01:3601946-3603229	G	F	OK	0.537423	0.215438	-1.31878	1.72572	1	0.10595	0.999263	no	MYB305 (myb domain protein 305); DNA binding / transcription factor
XLOC_012370	Prupe.4G030300	Pp04:1413598-1416201	G	F	OK	13.7882	10.1918	-0.436025	1.60338	1	0.106	0.999263	no	TPS14 (TERPENE SYNTHASE 14); S-linalool synthase
XLOC_017845	Prupe.6G065100	Pp06:4505355-4508586	G	F	OK	1.3046	0.785991	-0.731026	1.59868	1	0.106	0.999263	no	zinc finger (C3HC4-type RING finger) family protein
XLOC_017852	Prupe.6G067200	Pp06:4641396-4641963	G	F	OK	2.02631	0.994798	-1.02638	1.65188	1	0.10615	0.999263	no	MEE60 (maternal effect embryo arrest 60)
XLOC_011362	Prupe.3G129000	Pp03:13014226-13016176	G	F	OK	0.253375	0.0530413	-2.25609	1.98389	1	0.1062	0.999263	no	NA
XLOC_013630	Prupe.4G263700	Pp04:19377436-19388581	G	F	OK	0.276501	0.0578436	-2.25706	1.98474	1	0.1062	0.999263	no	NA
XLOC_015496	Prupe.5G075600	Pp05:8955356-8959521	G	F	OK	5.26139	3.81965	-0.462004	1.5624	1	0.1062	0.999263	no	ATBETAFRUCT4; beta-fructofuranosidase/ hydrolase, hydrolyzing O-glycosyl compounds
XLOC_003100	Prupe.1G008400	Pp01:692541-694269	G	F	OK	0.212689	0.059436	-1.83934	1.7742	1	0.10625	0.999263	no	NA
XLOC_001837	Prupe.1G354000	Pp01:32899175-32905305	G	F	OK	65.3359	49.3601	-0.404531	1.56937	1	0.10625	0.999263	no	SBE2.2 (starch branching enzyme 2.2); 1,4-alpha-glucan branching enzyme
XLOC_017826	Prupe.6G061900	Pp06:4277504-4278993	G	F	OK	0.51316	0.190214	-1.43179	1.73639	1	0.1063	0.999263	no	thioesterase family protein
XLOC_008410	Prupe.2G188200	Pp02:22853716-22856097	G	F	OK	3.44855	2.36239	-0.545739	1.60689	1	0.10635	0.999263	no	auxin-responsive protein -related
XLOC_007862	Prupe.2G065900	Pp02:9052887-9054539	G	F	OK	172.764	230.539	0.416211	-1.61362	1	0.1064	0.999263	no	NA
XLOC_004660	Prupe.1G339900	Pp01:31986048-31989109	G	F	OK	0.214112	0.0798939	-1.42221	1.72478	1	0.10645	0.999263	no	GAD4 (glutamate decarboxylase 4); calmodulin binding
XLOC_015405	Prupe.5G059900	Pp05:6462289-6466194	G	F	OK	0.293862	0.109457	-1.42477	1.72788	1	0.10645	0.999263	no	DNA binding
XLOC_021844	Prupe.7G129900	Pp07:14983101-14984537	G	F	OK	1.68242	2.60917	0.633057	-1.63188	1	0.10645	0.999263	no	transferase family protein
XLOC_004208	Prupe.1G241800	Pp01:25577536-25581283	G	F	OK	57.025	42.9201	-0.409942	1.60415	1	0.1065	0.999263	no	glycosyl hydrolase family 5 protein / cellulase family protein
XLOC_007078	Prupe.2G236700	Pp02:25805475-25806622	G	F	OK	0.67028	1.33608	0.995173	-1.63819	1	0.10655	0.999263	no	NA
XLOC_016592	Prupe.5G051500	Pp05:5531553-5533367	G	F	OK	0.58361	1.19202	1.03033	-1.65736	1	0.10655	0.999263	no	WAKL1 (wall associated kinase-like 1); kinase
XLOC_022050	Prupe.7G165400	Pp07:16968675-16970735	G	F	OK	96.3554	128.466	0.414947	-1.6194	1	0.1068	0.999263	no	fructose-bisphosphate aldolase, putative
XLOC_002145	Prupe.1G411900	Pp01:35951474-35952452	G	F	OK	0.571527	1.13271	0.98689	-1.68953	1	0.10685	0.999263	no	NA
XLOC_007959	Prupe.2G085300	Pp02:13512159-13513750	G	F	OK	7.13704	9.93883	0.477749	-1.64092	1	0.107	0.999263	no	UDP-glucoronosyl/UDP-glucosyl transferase family protein
XLOC_008484	Prupe.2G201600	Pp02:23817015-23820462	G	F	OK	7.91834	5.8532	-0.435974	1.55273	1	0.10715	0.999263	no	anac028 (Arabidopsis NAC domain containing protein 28); transcription factor
XLOC_016385	Prupe.5G008700	Pp05:918687-921688	G	F	OK	8.64792	12.0559	0.479308	-1.59526	1	0.10715	0.999263	no	unknown protein
XLOC_005647	Prupe.1G554600	Pp01:45290647-45296327	G	F	OK	9.57723	13.4012	0.484683	-1.55824	1	0.10735	0.999263	no	basic helix-loop-helix (bHLH) family protein
XLOC_007660	Prupe.2G018500	Pp02:1784359-1789032	G	F	OK	0.351265	0.184831	-0.926352	1.63726	1	0.10735	0.999263	no	NA
XLOC_014450	Prupe.4G147400	Pp04:8426659-8427952	G	F	OK	303.402	407.833	0.426749	-1.60934	1	0.10735	0.999263	no	ATGSTU19 (GLUTATHIONE S-TRANSFERASE TAU 19); glutathione binding / glutathione transferase
XLOC_006644	Prupe.2G155800	Pp02:20922629-20925337	G	F	OK	0.662138	0.385006	-0.782252	1.62986	1	0.10745	0.999263	no	AtRLP32 (Receptor Like Protein 32); kinase/ protein binding
XLOC_011950	Prupe.3G258400	Pp03:24546820-24550870	G	F	OK	12.6992	9.43188	-0.429122	1.56214	1	0.10745	0.999263	no	NA
XLOC_018983	Prupe.6G289400	Pp06:26739689-26741879	G	F	OK	0.930134	0.508497	-0.871199	1.55388	1	0.10765	0.999263	no	peroxidase, putative
XLOC_020948	Prupe.6G323500	Pp06:28506514-28508927	G	F	OK	1.73965	2.87668	0.725606	-1.60708	1	0.10765	0.999263	no	NA
XLOC_021640	Prupe.7G090600	Pp07:12405376-12409006	G	F	OK	44.0316	33.2091	-0.406959	1.5613	1	0.10765	0.999263	no	FLA17 (FASCICLIN-LIKE ARABINOGALACTAN PROTEIN 17 PRECURSOR)
XLOC_016201	Prupe.5G214500	Pp05:16905854-16907588	G	F	OK	4.95131	3.46209	-0.516167	1.60994	1	0.10795	0.999263	no	unknown protein
XLOC_008195	Prupe.2G135500	Pp02:19324007-19325528	G	F	OK	1.51889	0.907516	-0.743023	1.59717	1	0.10815	0.999263	no	NA
XLOC_023148	Prupe.7G123200	Pp07:14564900-14565872	G	F	OK	2.1538	1.28072	-0.749934	1.61341	1	0.1082	0.999263	no	NA
XLOC_019637	Prupe.6G055300	Pp06:3909543-3911429	G	F	OK	1.63571	2.55837	0.64531	-1.61463	1	0.1083	0.999263	no	oxidoreductase, 2OG-Fe(II) oxygenase family protein
XLOC_011732	Prupe.3G207800	Pp03:21416872-21419023	G	F	OK	2.78884	4.1951	0.58904	-1.58393	1	0.10835	0.999263	no	NA
XLOC_013156	Prupe.4G178400	Pp04:10589278-10591130	G	F	OK	0.243228	0.0799269	-1.60555	1.72645	1	0.10845	0.999263	no	transcriptional factor B3 family protein
XLOC_021153	Prupe.6G365700	Pp06:30691440-30697819	G	F	OK	0.229816	0.0755475	-1.60502	1.72587	1	0.10845	0.999263	no	NA
XLOC_023031	Prupe.7G099300	Pp07:13018650-13019988	G	F	OK	9.56514	13.2053	0.465258	-1.62002	1	0.10845	0.999263	no	40S ribosomal protein S17 (RPS17D)
XLOC_010884	Prupe.3G025300	Pp03:1841945-1843881	G	F	OK	0.431611	0.809035	0.906469	-1.65046	1	0.1085	0.999263	no	unknown protein
XLOC_024519	Prupe.8G130200	Pp08:15334337-15336563	G	F	OK	18.8237	25.1226	0.41643	-1.61057	1	0.1085	0.999263	no	UGT73B3 (UDP-glucosyl transferase 73B3); UDP-glycosyltransferase/ abscisic acid glucosyltransferase/ quercetin 3-O-glucosyltransferase/ transferase, transferring hexosyl groups
XLOC_014085	Prupe.4G067900	Pp04:3299386-3302172	G	F	OK	2.34112	1.56264	-0.583215	1.58258	1	0.10855	0.999263	no	unknown protein
XLOC_016284	Prupe.5G232700	Pp05:17707753-17710277	G	F	OK	0.141217	0.330126	1.2251	-1.66614	1	0.10855	0.999263	no	TUB6 (BETA-6 TUBULIN); structural constituent of cytoskeleton
XLOC_025106	Prupe.8G248000	Pp08:21430708-21444463	G	F	OK	11.9454	9.03415	-0.402999	1.54891	1	0.10905	0.999263	no	unknown protein
XLOC_007473	Prupe.2G312300	Pp02:29484496-29486645	G	F	OK	7.61919	5.43698	-0.486832	1.59392	1	0.10915	0.999263	no	protein phosphatase 2C, putative / PP2C, putative
XLOC_016717	Prupe.5G082100	Pp05:9516282-9517806	G	F	OK	3.38686	2.27344	-0.575076	1.61013	1	0.1092	0.999263	no	MATE efflux family protein
XLOC_007277	Prupe.2G275500	Pp02:27744000-27748279	G	F	OK	4.92547	3.59764	-0.45321	1.59761	1	0.10925	0.999263	no	leucine-rich repeat transmembrane protein kinase, putative
XLOC_019708	Prupe.6G068800	Pp06:4712424-4714743	G	F	OK	1.03004	0.619663	-0.733144	1.60639	1	0.10945	0.999263	no	protein phosphatase 2C, putative / PP2C, putative
XLOC_020968	Prupe.6G327200	Pp06:28714786-28715804	G	F	OK	12.9775	9.22809	-0.491904	1.60448	1	0.10955	0.999263	no	unknown protein
XLOC_012146	Prupe.3G299200	Pp03:26463361-26471931	G	F	OK	10.9781	8.26073	-0.410286	1.57416	1	0.1096	0.999263	no	hydrolase, acting on ester bonds
XLOC_014828	Prupe.4G234300	Pp04:15118948-15119512	G	F	OK	14.465	20.6496	0.513545	-1.60161	1	0.10965	0.999263	no	ATY1 (ARABIDOPSIS THIOREDOXIN Y1); electron carrier/ protein disulfide oxidoreductase
XLOC_009261	Prupe.3G036500	Pp03:2640877-2644364	G	F	OK	3.93166	2.79846	-0.490507	1.55056	1	0.1098	0.999263	no	unknown protein
XLOC_015899	Prupe.5G152200	Pp05:13740113-13742121	G	F	OK	2.15238	3.15521	0.551803	-1.58854	1	0.10985	0.999263	no	CYP94B3; electron carrier/ heme binding / iron ion binding / monooxygenase/ oxygen binding
XLOC_007288	Prupe.2G277800	Pp02:27853667-27858419	G	F	OK	11.6798	15.6764	0.424586	-1.56199	1	0.11	0.999263	no	ATTPPA; trehalose-phosphatase
XLOC_026142	Prupe.8G192000	Pp08:18622098-18623493	G	F	OK	8.51563	12.0016	0.495042	-1.6045	1	0.11	0.999263	no	NA
XLOC_016979	Prupe.5G137700	Pp05:12977123-12980208	G	F	OK	2.00107	1.36769	-0.549035	1.55754	1	0.1101	0.999263	no	fringe-related protein
XLOC_010499	Prupe.3G269600	Pp03:25129960-25133669	G	F	OK	33.6716	44.7784	0.41127	-1.56648	1	0.1102	0.999263	no	RNA recognition motif (RRM)-containing protein
XLOC_020682	Prupe.6G270900	Pp06:25697285-25699401	G	F	OK	3.28813	2.28946	-0.522259	1.58894	1	0.1103	0.999263	no	FUNCTIONS IN: molecular_function unknown; INVOLVED IN: biological_process unknown; LOCATED IN: plasma membrane; CONTAINS InterPro DOMAIN/s: Protein of unknown function DUF740 (InterPro:IPR008004); BEST Arabidopsis thaliana protein match is: glycine-rich protein (TAIR:AT3G09070.1); Has 75 Blast hits to 75 proteins in 20 species: Archae - 0; Bacteria - 1; Metazoa - 11; Fungi - 3; Plants - 40; Virus…
XLOC_005327	Prupe.1G486400	Pp01:40496322-40502732	G	F	OK	21.2236	16.0409	-0.403913	1.55391	1	0.11045	0.999263	no	FUNCTIONS IN: molecular_function unknown; INVOLVED IN: biological_process unknown; LOCATED IN: cellular_component unknown; EXPRESSED IN: 23 plant structures; EXPRESSED DURING: 14 growth stages; CONTAINS InterPro DOMAIN/s: Transport protein Trs120 (InterPro:IPR013935); Has 230 Blast hits to 190 proteins in 91 species: Archae - 0; Bacteria - 0; Metazoa - 128; Fungi - 64; Plants - 15; Viruses - 0; O…
XLOC_018613	Prupe.6G217500	Pp06:22440309-22441230	G	F	OK	5.34411	7.92514	0.568485	-1.55085	1	0.11045	0.999263	no	ATPSK2 (PHYTOSULFOKINE 2 PRECURSOR); growth factor
XLOC_010070	Prupe.3G193200	Pp03:20491846-20493760	G	F	OK	5.12647	3.41807	-0.584785	1.55773	1	0.1105	0.999263	no	ATP binding / nucleotide binding / phenylalanine-tRNA ligase
XLOC_007203	Prupe.2G261200	Pp02:27047516-27050384	G	F	OK	3.69567	2.63141	-0.490003	1.56038	1	0.1106	0.999263	no	NA
XLOC_004092	Prupe.1G218100	Pp01:23298120-23306201	G	F	OK	1.34919	0.848028	-0.669914	1.61673	1	0.11065	0.999263	no	unknown protein
XLOC_009811	Prupe.3G140400	Pp03:14813054-14817304	G	F	OK	0.523747	0.891355	0.767131	-1.6177	1	0.11065	0.999263	no	unknown protein
XLOC_009835	Prupe.3G145000	Pp03:15845512-15852145	G	F	OK	11.6351	8.67903	-0.422875	1.58163	1	0.11095	0.999263	no	CRS1 (ARABIDOPSIS ORTHOLOG OF MAIZE CHLOROPLAST SPLICING FACTOR CRS1); RNA splicing factor, transesterification mechanism
XLOC_011641	Prupe.3G184100	Pp03:19912174-19914417	G	F	OK	6.5111	4.64288	-0.487884	1.58346	1	0.111	0.999263	no	LOCATED IN: endomembrane system; CONTAINS InterPro DOMAIN/s: X8 (InterPro:IPR012946); BEST Arabidopsis thaliana protein match is: glycosyl hydrolase family protein 17 (TAIR:AT5G67460.1); Has 4247 Blast hits to 3762 proteins in 375 species: Archae - 10; Bacteria - 432; Metazoa - 1406; Fungi - 619; Plants - 1140; Viruses - 87; Other Eukaryotes - 553 (source: NCBI BLink).
XLOC_010174	Prupe.3G210100	Pp03:21562799-21566403	G	F	OK	1.67039	1.13142	-0.562045	1.58951	1	0.11105	0.999263	no	armadillo/beta-catenin repeat family protein
XLOC_019053	Prupe.6G303400	Pp06:27489001-27493083	G	F	OK	23.7958	17.8818	-0.412212	1.60751	1	0.1112	0.999263	no	NA
XLOC_000701	Prupe.1G127900	Pp01:10014968-10015956	G	F	OK	20.1619	27.4423	0.444766	-1.58559	1	0.1113	0.999263	no	NA
XLOC_005474	Prupe.1G516800	Pp01:42494884-42501443	G	F	OK	0.436228	0.244548	-0.834966	1.62153	1	0.11135	0.999263	no	ZYP1a
XLOC_011007	Prupe.3G051200	Pp03:3603961-3607052	G	F	OK	0.66292	0.394318	-0.749475	1.57848	1	0.1114	0.999263	no	PLDEPSILON (PHOSPHOLIPASE D ALPHA 4); phospholipase D
XLOC_004161	Prupe.1G231700	Pp01:24670787-24678806	G	F	OK	8.85102	6.21673	-0.509687	1.52448	1	0.11145	0.999263	no	unknown protein
XLOC_003090	Prupe.1G005900	Pp01:512719-513907	G	F	OK	1.75697	2.7633	0.653306	-1.61187	1	0.1116	0.999263	no	NA
XLOC_007851	Prupe.2G064000	Pp02:8584754-8586945	G	F	OK	4.82508	3.45489	-0.481911	1.55257	1	0.11165	0.999263	no	NA
XLOC_017343	Prupe.5G211300	Pp05:16771658-16775106	G	F	OK	6.71624	9.52315	0.503785	-1.56351	1	0.1117	0.999263	no	NA
XLOC_010101	Prupe.3G198200	Pp03:20802079-20806764	G	F	OK	15.363	11.5483	-0.411777	1.5876	1	0.1119	0.999263	no	PHYC (phytochrome defective c); protein histidine kinase
XLOC_014033	Prupe.4G054200	Pp04:2615444-2619074	G	F	OK	14.6374	19.5607	0.418298	-1.58835	1	0.112	0.999263	no	NA
XLOC_024783	Prupe.8G184900	Pp08:18318457-18325174	G	F	OK	5.98756	4.49407	-0.413946	1.57065	1	0.11215	0.999263	no	disease resistance protein (TIR-NBS-LRR class), putative
XLOC_013108	Prupe.4G171100	Pp04:10105746-10108882	G	F	OK	48.7682	36.7389	-0.408633	1.59618	1	0.1122	0.999263	no	TCP4 (TCP family transcription factor 4); transcription factor
XLOC_025620	Prupe.8G085400	Pp08:11825035-11828600	G	F	OK	5.8093	4.19221	-0.470653	1.57903	1	0.1122	0.999263	no	AtGH9B18 (Arabidopsis thaliana glycosyl hydrolase 9B18); catalytic/ hydrolase, hydrolyzing O-glycosyl compounds
XLOC_022689	Prupe.7G022100	Pp07:3411390-3415005	G	F	OK	18.6755	25.4052	0.443978	-1.56047	1	0.11225	0.999263	no	SYP51 (SYNTAXIN OF PLANTS 51); SNAP receptor
XLOC_025043	Prupe.8G237900	Pp08:20971360-20972511	G	F	OK	0.188386	0.538064	1.51409	-1.74052	1	0.11225	0.999263	no	NA
XLOC_011434	Prupe.3G144200	Pp03:15653921-15654869	G	F	OK	1.75827	1.0057	-0.805955	1.60603	1	0.1123	0.999263	no	tryptophan synthase, alpha subunit, putative
XLOC_016776	Prupe.5G093400	Pp05:10338381-10342007	G	F	OK	1.70384	1.09112	-0.642986	1.53962	1	0.1127	0.999263	no	PC-MYB1; DNA binding / transcription coactivator/ transcription factor
XLOC_017687	Prupe.6G033900	Pp06:2573483-2575668	G	F	OK	17.9481	24.2312	0.433038	-1.5427	1	0.1127	0.999263	no	FUNCTIONS IN: molecular_function unknown; INVOLVED IN: biological_process unknown; LOCATED IN: anchored to membrane; EXPRESSED IN: 22 plant structures; EXPRESSED DURING: 13 growth stages; BEST Arabidopsis thaliana protein match is: LRE (LORELEI) (TAIR:AT4G26466.1); Has 71 Blast hits to 71 proteins in 9 species: Archae - 0; Bacteria - 0; Metazoa - 0; Fungi - 0; Plants - 71; Viruses - 0; Other Euka…
XLOC_002350	Prupe.1G449600	Pp01:37929389-37935825	G	F	OK	100.223	133.171	0.410063	-1.5397	1	0.1128	0.999263	no	lactoylglutathione lyase, putative / glyoxalase I, putative
XLOC_010843	Prupe.3G018000	Pp03:1289823-1291818	G	F	OK	3.89616	2.73124	-0.512495	1.58153	1	0.11285	0.999263	no	ATEXO70G1 (exocyst subunit EXO70 family protein G1); protein binding
XLOC_009125	Prupe.3G009500	Pp03:606162-610062	G	F	OK	0.20556	0.0690299	-1.57427	1.82149	1	0.1131	0.999263	no	ATBFRUCT1; beta-fructofuranosidase/ hydrolase, hydrolyzing O-glycosyl compounds
XLOC_017588	Prupe.6G010700	Pp06:794974-795773	G	F	OK	9.90849	13.9197	0.490387	-1.56245	1	0.1131	0.999263	no	unknown protein
XLOC_024156	Prupe.8G061800	Pp08:8907650-8912888	G	F	OK	12.5287	17.0367	0.443415	-1.54988	1	0.1131	0.999263	no	unknown protein
XLOC_009312	Prupe.3G046800	Pp03:3330289-3333393	G	F	OK	0.321285	0.141208	-1.18603	1.67507	1	0.1132	0.999263	no	IQD6 (IQ-domain 6); calmodulin binding
XLOC_022466	Prupe.7G246700	Pp07:20972075-20981687	G	F	OK	7.86511	5.89087	-0.416986	1.58603	1	0.11325	0.999263	no	transducin family protein / WD-40 repeat family protein
XLOC_016813	Prupe.5G102600	Pp05:10968841-10970440	G	F	OK	24.5196	18.3501	-0.418149	1.58719	1	0.11335	0.999263	no	CYP86A8; fatty acid (omega-1)-hydroxylase/ oxygen binding
XLOC_019850	Prupe.6G097700	Pp06:6797476-6804537	G	F	OK	9.54584	7.16136	-0.41464	1.53903	1	0.1134	0.999263	no	ARF4 (AUXIN RESPONSE FACTOR 4); transcription factor
XLOC_010765	Prupe.3G003600	Pp03:245465-246404	G	F	OK	33.296	45.083	0.437237	-1.59333	1	0.11355	0.999263	no	ATRL6 (ARABIDOPSIS RAD-LIKE 6); transcription factor
XLOC_001217	Prupe.1G237800	Pp01:25209839-25211004	G	F	OK	12.955	17.7109	0.451126	-1.58129	1	0.11375	0.999263	no	HSP21 (HEAT SHOCK PROTEIN 21)
XLOC_023567	Prupe.7G217400	Pp07:19608597-19611514	G	F	OK	1.39554	2.10686	0.59427	-1.59513	1	0.1138	0.999263	no	unknown protein
XLOC_013329	Prupe.4G205500	Pp04:12815776-12817225	G	F	OK	21.3817	15.7062	-0.445037	1.57128	1	0.1139	0.999263	no	plastocyanin-like domain-containing protein
XLOC_025140	Prupe.8G255400	Pp08:21797747-21807879	G	F	OK	24.8074	18.8018	-0.3999	1.5595	1	0.1139	0.999263	no	zinc ion binding
XLOC_018959	Prupe.6G284000	Pp06:26397226-26397928	G	F	OK	3.44825	5.39279	0.645167	-1.59655	1	0.1141	0.999263	no	unknown protein
XLOC_022046	Prupe.7G164600	Pp07:16926498-16928891	G	F	OK	2.52183	1.72677	-0.546398	1.57658	1	0.11425	0.999263	no	FAH1 (FERULIC ACID 5-HYDROXYLASE 1); ferulate 5-hydroxylase/ monooxygenase
XLOC_013059	Prupe.4G163300	Pp04:9409657-9411078	G	F	OK	2.72993	4.14576	0.602775	-1.58037	1	0.1143	0.999263	no	NA
XLOC_016926	Prupe.5G125500	Pp05:12317650-12318522	G	F	OK	11.2496	15.9459	0.503318	-1.57206	1	0.11435	0.999263	no	NA
XLOC_013926	Prupe.4G031800	Pp04:1476923-1480441	G	F	OK	0.261901	0.461291	0.816657	-1.52308	1	0.1144	0.999263	no	S-locus protein kinase, putative
XLOC_013975	Prupe.4G042500	Pp04:2001505-2003763	G	F	OK	3.24471	2.16873	-0.581236	1.56196	1	0.11465	0.999263	no	OBP2; DNA binding / transcription factor
XLOC_006547	Prupe.2G138600	Pp02:19563707-19567777	G	F	OK	0.504706	0.236254	-1.0951	1.60393	1	0.1147	0.999263	no	unknown protein
XLOC_021447	Prupe.7G054100	Pp07:9253251-9257412	G	F	OK	6.18438	4.39724	-0.492029	1.52468	1	0.11475	0.999263	no	phosphate translocator-related
XLOC_026050	Prupe.8G173700	Pp08:17659254-17661628	G	F	OK	2.79185	1.93603	-0.528116	1.57076	1	0.11475	0.999263	no	NA
XLOC_008554	Prupe.2G215200	Pp02:24602801-24607006	G	F	OK	3.78132	5.26626	0.477887	-1.57179	1	0.11495	0.999263	no	MLO6 (MILDEW RESISTANCE LOCUS O 6); calmodulin binding
XLOC_016802	Prupe.5G099500	Pp05:10772698-10775320	G	F	OK	3.41226	2.3827	-0.518131	1.57606	1	0.1151	0.999263	no	TUB6 (BETA-6 TUBULIN); structural constituent of cytoskeleton
XLOC_021364	Prupe.7G038200	Pp07:7097580-7098362	G	F	OK	25.5388	34.5962	0.437926	-1.57279	1	0.1152	0.999263	no	NA
XLOC_015723	Prupe.5G120200	Pp05:12018891-12020039	G	F	OK	1.48576	2.38096	0.680337	-1.60109	1	0.11525	0.999263	no	unknown protein
XLOC_018142	Prupe.6G124200	Pp06:9287401-9310824	G	F	OK	3.2284	2.42387	-0.413507	1.5167	1	0.1156	0.999263	no	TIL1 (TILTED 1); DNA binding / DNA-directed DNA polymerase/ nucleic acid binding / nucleotide binding / zinc ion binding
XLOC_024413	Prupe.8G110300	Pp08:13996824-13999789	G	F	OK	1.42923	0.947742	-0.592666	1.58736	1	0.1156	0.999263	no	ankyrin repeat family protein
XLOC_010959	Prupe.3G041600	Pp03:2968174-2971155	G	F	OK	17.7737	23.502	0.40304	-1.57104	1	0.1159	0.999263	no	unknown protein
XLOC_015943	Prupe.5G160800	Pp05:14164695-14166158	G	F	OK	32.3932	43.9204	0.439198	-1.5762	1	0.1159	0.999263	no	unknown protein
XLOC_019688	Prupe.6G065500	Pp06:4534252-4535333	G	F	OK	3.97871	5.81123	0.546541	-1.5167	1	0.1159	0.999263	no	NA
XLOC_024687	Prupe.8G164700	Pp08:17153471-17163654	G	F	OK	53.0599	39.537	-0.424419	1.60221	1	0.11595	0.999263	no	KAK (KAKTUS); ubiquitin-protein ligase
XLOC_018816	Prupe.6G255300	Pp06:24817154-24818527	G	F	OK	3.00127	4.51286	0.588468	-1.58393	1	0.11605	0.999263	no	TIM9; P-P-bond-hydrolysis-driven protein transmembrane transporter
XLOC_003576	Prupe.1G114900	Pp01:9094139-9094522	G	F	OK	0	0.72943	Inf	NA	1	0.1162	0.999263	no	NA
XLOC_003674	Prupe.1G138400	Pp01:10821595-10823008	G	F	OK	0	0.363985	Inf	NA	1	0.1162	0.999263	no	unknown protein
XLOC_007876	Prupe.2G068700	Pp02:9787709-9788275	G	F	OK	0	0.412324	Inf	NA	1	0.1162	0.999263	no	NA
XLOC_008894	Prupe.2G291600	Pp02:28505660-28505905	G	F	OK	0	0.368875	Inf	NA	1	0.1162	0.999263	no	F-box family protein
XLOC_010221	Prupe.3G219000	Pp03:22031834-22032532	G	F	OK	0	2.17534	Inf	NA	1	0.1162	0.999263	no	NA
XLOC_020568	Prupe.6G248300	Pp06:24427994-24428324	G	F	OK	0	0.611081	Inf	NA	1	0.1162	0.999263	no	NA
XLOC_026139	Prupe.8G191500	Pp08:18587741-18588032	G	F	OK	0	0.221342	Inf	NA	1	0.1162	0.999263	no	NA
XLOC_026211	Prupe.8G206000	Pp08:19311062-19311329	G	F	OK	0	0.282115	Inf	NA	1	0.1162	0.999263	no	NA
XLOC_019413	Prupe.6G012500	Pp06:888931-889198	G	F	OK	3.54677	0.846345	-2.06719	1.78137	1	0.1163	0.999263	no	NA
XLOC_018664	Prupe.6G227100	Pp06:23124653-23126855	G	F	OK	0.846286	0.480466	-0.81671	1.5844	1	0.1163	0.999263	no	CYP81D8; electron carrier/ heme binding / iron ion binding / monooxygenase/ oxygen binding
XLOC_020195	Prupe.6G168600	Pp06:17326172-17349930	G	F	OK	15.0616	11.5013	-0.389078	1.50303	1	0.11635	0.999263	no	unknown protein
XLOC_017919	Prupe.6G082400	Pp06:5555889-5556928	G	F	OK	11.329	16.6405	0.554676	-1.56906	1	0.1164	0.999263	no	GRP4 (GLYCINE-RICH RNA-BINDING PROTEIN 4); RNA binding / double-stranded DNA binding / single-stranded DNA binding
XLOC_001553	Prupe.1G300100	Pp01:29494241-29495856	G	F	OK	0.494596	0.877559	0.827244	-1.58342	1	0.11645	0.999263	no	unknown protein
XLOC_022570	Prupe.7G267500	Pp07:22050990-22054704	G	F	OK	3.35186	2.38748	-0.489475	1.5671	1	0.11645	0.999263	no	NA
XLOC_021843	Prupe.7G129600	Pp07:14961710-14968427	G	F	OK	27.5067	20.8094	-0.402546	1.57303	1	0.1165	0.999263	no	ABCB1 (ATP BINDING CASSETTE SUBFAMILY B1); ATPase, coupled to transmembrane movement of substances / auxin efflux transmembrane transporter/ calmodulin binding
XLOC_017069	Prupe.5G158300	Pp05:14040123-14043842	G	F	OK	35.6635	27.2044	-0.390607	1.52645	1	0.11655	0.999263	no	zinc finger (CCCH-type) family protein
XLOC_024497	Prupe.8G127200	Pp08:15128638-15130546	G	F	OK	9.97082	7.25274	-0.459187	1.58502	1	0.1167	0.999263	no	RPP8 (RECOGNITION OF PERONOSPORA PARASITICA 8); nucleotide binding
XLOC_016377	Prupe.5G006800	Pp05:742195-744841	G	F	OK	10.8669	14.5046	0.416572	-1.5261	1	0.11675	0.999263	no	unknown protein
XLOC_021578	Prupe.7G078200	Pp07:11417273-11418390	G	F	OK	0.397397	0.881313	1.14907	-1.63069	1	0.11675	0.999263	no	ATP binding / protein binding
XLOC_008777	Prupe.2G264300	Pp02:27185071-27189681	G	F	OK	3.75012	2.73723	-0.45422	1.56916	1	0.1169	0.999263	no	leucine-rich repeat transmembrane protein kinase, putative
XLOC_009072	Prupe.2G327600	Pp02:30166464-30167650	G	F	OK	38.9158	51.5041	0.40433	-1.56333	1	0.11705	0.999263	no	NA
XLOC_023889	Prupe.8G009300	Pp08:688669-691488	G	F	OK	0.789475	0.482324	-0.710891	1.55254	1	0.11745	0.999263	no	RPM1 (RESISTANCE TO P. SYRINGAE PV MACULICOLA 1); nucleotide binding / protein binding
XLOC_015712	Prupe.5G116400	Pp05:11848885-11851208	G	F	OK	52.9933	69.9608	0.400736	-1.56628	1	0.1175	0.999263	no	dihydroflavonol 4-reductase family / dihydrokaempferol 4-reductase family
XLOC_006342	Prupe.2G101400	Pp02:15739189-15740100	G	F	OK	0.690226	1.46922	1.08991	-1.63173	1	0.11765	0.999263	no	ATGSTU8 (GLUTATHIONE S-TRANSFERASE TAU 8); glutathione transferase
XLOC_020600	Prupe.6G255500	Pp06:24825552-24836827	G	F	OK	28.554	21.6088	-0.402073	1.53429	1	0.1177	0.999263	no	PRT6 (PROTEOLYSIS 6); ubiquitin-protein ligase
XLOC_025129	Prupe.8G253100	Pp08:21674856-21678473	G	F	OK	0.544063	0.298481	-0.866136	1.57112	1	0.1177	0.999263	no	NHX2 (SODIUM HYDROGEN EXCHANGER 2); sodium ion transmembrane transporter/ sodium:hydrogen antiporter
XLOC_014748	Prupe.4G216700	Pp04:13579869-13586689	G	F	OK	12.6518	20.9877	0.730208	-1.51081	1	0.1179	0.999263	no	NA
XLOC_000561	Prupe.1G102700	Pp01:8204489-8214876	G	F	OK	0.727526	0	-Inf	NA	1	0.11795	0.999263	no	NA
XLOC_015652	Prupe.5G104900	Pp05:11154997-11156590	G	F	OK	1.38043	0.801731	-0.783928	1.53063	1	0.11795	0.999263	no	FUNCTIONS IN: molecular_function unknown; INVOLVED IN: biological_process unknown; EXPRESSED IN: cultured cell; BEST Arabidopsis thaliana protein match is: nuclear transport factor 2 (NTF2) family protein (TAIR:AT1G71480.1); Has 52 Blast hits to 52 proteins in 18 species: Archae - 0; Bacteria - 13; Metazoa - 0; Fungi - 0; Plants - 35; Viruses - 0; Other Eukaryotes - 4 (source: NCBI BLink).
XLOC_005893	Prupe.2G017700	Pp02:1656865-1661601	G	F	OK	15.811	21.38	0.435329	-1.56211	1	0.118	0.999263	no	cytochrome b5 domain-containing protein
XLOC_019902	Prupe.6G107600	Pp06:7665239-7668161	G	F	OK	51.5168	67.6788	0.393661	-1.52028	1	0.118	0.999263	no	unknown protein
XLOC_001155	Prupe.1G224500	Pp01:23848377-23849981	G	F	OK	74.9159	98.2927	0.391812	-1.52519	1	0.11815	0.999263	no	FUNCTIONS IN: molecular_function unknown; INVOLVED IN: response to oxidative stress; LOCATED IN: cellular_component unknown; EXPRESSED IN: male gametophyte, pollen tube; EXPRESSED DURING: L mature pollen stage, M germinated pollen stage; CONTAINS InterPro DOMAIN/s: Ribosome associated membrane RAMP4 (InterPro:IPR010580); BEST Arabidopsis thaliana protein match is: unknown protein (TAIR:AT1G27350.…
XLOC_021878	Prupe.7G134600	Pp07:15241358-15242172	G	F	OK	15.2525	20.9649	0.458931	-1.5629	1	0.11815	0.999263	no	NA
XLOC_006811	Prupe.2G183300	Pp02:22545578-22546717	G	F	OK	2.10254	1.27357	-0.723246	1.57797	1	0.1182	0.999263	no	NA
XLOC_018170	Prupe.6G129700	Pp06:10064455-10067410	G	F	OK	78.4487	103.518	0.400062	-1.49522	1	0.1182	0.999263	no	60S ribosomal protein L10A (RPL10aA)
XLOC_022980	Prupe.7G086800	Pp07:12138072-12139680	G	F	OK	41.9835	55.7579	0.409355	-1.55887	1	0.1183	0.999263	no	40S ribosomal protein S28 (RPS28B)
XLOC_006468	Prupe.2G124700	Pp02:18082722-18085231	G	F	OK	0.668778	1.15836	0.792481	-1.56789	1	0.1184	0.999263	no	NA
XLOC_011929	Prupe.3G250700	Pp03:24094667-24096068	G	F	OK	0.0641405	0.250616	1.96617	-1.83211	1	0.1185	0.999263	no	unknown protein
XLOC_013954	Prupe.4G039100	Pp04:1832437-1832623	G	F	OK	3.5036	15.5827	2.15304	-1.87805	1	0.11855	0.999263	no	NA
XLOC_022726	Prupe.7G029400	Pp07:5442416-5442986	G	F	OK	0.196629	0.930112	2.24193	-1.93954	1	0.11855	0.999263	no	RPS10 (RIBOSOMAL PROTEIN S10); structural constituent of ribosome
XLOC_018034	Prupe.6G104500	Pp06:7362423-7363182	G	F	OK	0.207601	0.64131	1.62721	-1.68797	1	0.11865	0.999263	no	NA
XLOC_019964	Prupe.6G121200	Pp06:9004946-9018477	G	F	OK	0.415052	0.209307	-0.987673	1.53225	1	0.1188	0.999263	no	PDR11 (PLEIOTROPIC DRUG RESISTANCE 11); ATPase, coupled to transmembrane movement of substances
XLOC_002228	Prupe.1G427900	Pp01:36775211-36776728	G	F	OK	0.613773	1.06113	0.789825	-1.60658	1	0.11895	0.999263	no	leucine-rich repeat transmembrane protein kinase, putative
XLOC_004831	Prupe.1G377300	Pp01:34153040-34154895	G	F	OK	40.2457	30.422	-0.403722	1.56073	1	0.119	0.999263	no	isoflavone reductase, putative
XLOC_000060	Prupe.1G011200	Pp01:859244-867025	G	F	OK	58.3479	44.1037	-0.403779	1.50385	1	0.1191	0.999263	no	TIC (TIME FOR COFFEE)
XLOC_009454	Prupe.3G074200	Pp03:5349909-5369268	G	F	OK	5.8768	4.47214	-0.394066	1.51464	1	0.11915	0.999263	no	binding
XLOC_020507	Prupe.6G235600	Pp06:23652868-23662260	G	F	OK	36.5821	27.9216	-0.389758	1.49262	1	0.11925	0.999263	no	EIN2 (ETHYLENE INSENSITIVE 2); transporter
XLOC_000838	Prupe.1G154200	Pp01:12128826-12133729	G	F	OK	3.36531	2.40832	-0.482711	1.51393	1	0.1194	0.999263	no	ANP3 (ARABIDOPSIS NPK1-RELATED PROTEIN KINASE 3); ATP binding / kinase/ protein kinase/ protein serine/threonine kinase
XLOC_014331	Prupe.4G118800	Pp04:6428420-6430796	G	F	OK	4.66288	3.26431	-0.514442	1.56744	1	0.11945	0.999263	no	NA
XLOC_007635	Prupe.2G014300	Pp02:1260466-1269026	G	F	OK	36.8186	27.9763	-0.396232	1.51878	1	0.1196	0.999263	no	CEV1 (CONSTITUTIVE EXPRESSION OF VSP 1); cellulose synthase/ transferase, transferring glycosyl groups
XLOC_011179	Prupe.3G087500	Pp03:6484606-6487138	G	F	OK	5.9405	4.27598	-0.47433	1.54839	1	0.1196	0.999263	no	phosphatidic acid phosphatase-related / PAP2-related
XLOC_014813	Prupe.4G231800	Pp04:14851403-14856525	G	F	OK	2.63414	1.91724	-0.4583	1.54546	1	0.1196	0.999263	no	TRN1 (TORNADO 1)
XLOC_015322	Prupe.5G043200	Pp05:4755635-4759836	G	F	OK	10.0445	13.4652	0.422828	-1.54475	1	0.1197	0.999263	no	ribose-phosphate pyrophosphokinase 1 / phosphoribosyl diphosphate synthetase 1 (PRSI)
XLOC_016266	Prupe.5G227800	Pp05:17508532-17511367	G	F	OK	0.691655	0.42438	-0.704696	1.56451	1	0.11985	0.999263	no	disease resistance protein (NBS-LRR class), putative
XLOC_024612	Prupe.8G150700	Pp08:16397863-16405220	G	F	OK	8.25206	11.1812	0.438243	-1.5493	1	0.11995	0.999263	no	NA
XLOC_001321	Prupe.1G256300	Pp01:26659952-26663649	G	F	OK	5.04537	3.643	-0.469835	1.5347	1	0.12	0.999263	no	NHL repeat-containing protein
XLOC_008295	Prupe.2G158900	Pp02:21155370-21160603	G	F	OK	0.683302	1.1718	0.778128	-1.51669	1	0.12015	0.999263	no	NA
XLOC_018001	Prupe.6G096700	Pp06:6711796-6713540	G	F	OK	3.03307	4.67928	0.625508	-1.57469	1	0.1202	0.999263	no	NA
XLOC_019468	Prupe.6G020100	Pp06:1597456-1607825	G	F	OK	0.512835	0.866935	0.757428	-1.57867	1	0.12025	0.999263	no	BGLU17 (BETA GLUCOSIDASE 17); catalytic/ cation binding / hydrolase, hydrolyzing O-glycosyl compounds
XLOC_004036	Prupe.1G207800	Pp01:21338915-21339705	G	F	OK	0.217838	0	-Inf	NA	1	0.1203	0.999263	no	RNA-binding protein, putative
XLOC_009640	Prupe.3G108600	Pp03:8727735-8728076	G	F	OK	0.272828	0	-Inf	NA	1	0.1203	0.999263	no	NA
XLOC_019501	Prupe.6G025900	Pp06:2054130-2054415	G	F	OK	0.224459	0	-Inf	NA	1	0.1203	0.999263	no	heavy-metal-associated domain-containing protein
XLOC_021697	Prupe.7G100100	Pp07:13062246-13062435	G	F	OK	1.07488	0	-Inf	NA	1	0.1203	0.999263	no	NA
XLOC_024276	Prupe.8G082600	Pp08:11549338-11549566	G	F	OK	0.469981	0	-Inf	NA	1	0.1203	0.999263	no	MEE3 (MATERNAL EFFECT EMBRYO ARREST 3); DNA binding / transcription factor
XLOC_023231	Prupe.7G141200	Pp07:15664620-15666498	G	F	OK	0.997433	1.58812	0.67103	-1.58094	1	0.1204	0.999263	no	MES3 (METHYL ESTERASE 3); hydrolase, acting on ester bonds / methyl indole-3-acetate esterase/ methyl jasmonate esterase
XLOC_004370	Prupe.1G277200	Pp01:28208716-28209710	G	F	OK	81.0723	106.653	0.395639	-1.54291	1	0.1205	0.999263	no	oxygen evolving enhancer 3 (PsbQ) family protein
XLOC_002477	Prupe.1G474600	Pp01:39431541-39433083	G	F	OK	1.90135	2.91086	0.614422	-1.48455	1	0.12075	0.999263	no	zinc finger (Ran-binding) family protein
XLOC_022163	Prupe.7G188500	Pp07:18122359-18126647	G	F	OK	12.0415	9.07147	-0.408602	1.55121	1	0.12075	0.999263	no	subtilase family protein
XLOC_001608	Prupe.1G310700	Pp01:30211624-30213822	G	F	OK	2.55776	1.67619	-0.609692	1.58337	1	0.1208	0.999263	no	HMT-1; homocysteine S-methyltransferase
XLOC_017099	Prupe.5G162900	Pp05:14242210-14242914	G	F	OK	0.231528	0.682084	1.55876	-1.7099	1	0.1208	0.999263	no	NA
XLOC_002096	Prupe.1G403400	Pp01:35522533-35524022	G	F	OK	12.9278	17.5275	0.43914	-1.55099	1	0.1209	0.999263	no	unknown protein
XLOC_005064	Prupe.1G431500	Pp01:36958039-36967793	G	F	OK	20.5619	15.6497	-0.393835	1.5088	1	0.1209	0.999263	no	FRA1 (FRAGILE FIBER 1); microtubule motor
XLOC_013822	Prupe.4G009800	Pp04:483995-485511	G	F	OK	210.198	159.158	-0.401294	1.55258	1	0.121	0.999263	no	NA
XLOC_024871	Prupe.8G201800	Pp08:19034949-19048910	G	F	OK	18.8479	14.407	-0.387634	1.51543	1	0.12105	0.999263	no	DNA binding
XLOC_008340	Prupe.2G170500	Pp02:21756609-21770406	G	F	OK	19.0707	14.506	-0.394712	1.49967	1	0.1212	0.999263	no	CRP (CRYPTIC PRECOCIOUS)
XLOC_022266	Prupe.7G209300	Pp07:19194298-19202257	G	F	OK	26.3155	20.0931	-0.389211	1.49812	1	0.1213	0.999263	no	NA
XLOC_024795	Prupe.8G187300	Pp08:18417626-18424976	G	F	OK	113.641	150.007	0.400543	-1.52168	1	0.12145	0.999263	no	hydrolase, alpha/beta fold family protein
XLOC_018328	Prupe.6G161700	Pp06:15056140-15059943	G	F	OK	7.40968	5.56802	-0.412249	1.48575	1	0.1216	0.999263	no	leucine-rich repeat transmembrane protein kinase, putative
XLOC_020286	Prupe.6G189700	Pp06:19741815-19743916	G	F	OK	3.36609	2.31961	-0.537193	1.55707	1	0.1216	0.999263	no	unknown protein
XLOC_000730	Prupe.1G133100,Prupe.1G133200	Pp01:10534991-10536253	G	F	OK	1.35896	2.46139	0.856967	-1.46275	1	0.12165	0.999263	no	NA
XLOC_013611	Prupe.4G261100	Pp04:18954467-18955413	G	F	OK	0.0868479	0.385497	2.15016	-1.85132	1	0.12175	0.999263	no	NA
XLOC_024647	Prupe.8G159300	Pp08:16855571-16858321	G	F	OK	0.05052	0.225512	2.15828	-1.85831	1	0.12175	0.999263	no	COBL1 (COBRA-LIKE PROTEIN 1 PRECURSOR)
XLOC_010376	Prupe.3G246900	Pp03:23797311-23800181	G	F	OK	12.844	9.58798	-0.421793	1.55676	1	0.1218	0.999263	no	amino acid transporter family protein
XLOC_021762	Prupe.7G113300	Pp07:13910035-13913543	G	F	OK	0.17057	0.367899	1.10894	-1.61547	1	0.1218	0.999263	no	PAP22 (PURPLE ACID PHOSPHATASE 22); acid phosphatase/ protein serine/threonine phosphatase
XLOC_022036	Prupe.7G162900	Pp07:16806840-16812054	G	F	OK	13.6106	10.1605	-0.421748	1.56322	1	0.1218	0.999263	no	ROT3 (ROTUNDIFOLIA 3); oxidoreductase, acting on paired donors, with incorporation or reduction of molecular oxygen, NADH or NADPH as one donor, and incorporation of one atom of oxygen / oxygen binding / steroid hydroxylase
XLOC_001770	Prupe.1G341500,Prupe.1G341600	Pp01:32095017-32096585	G	F	OK	478.366	363.48	-0.396239	1.49397	1	0.12185	0.999263	no	NA
XLOC_009235	Prupe.3G032700	Pp03:2417579-2419799	G	F	OK	0.792958	1.32755	0.743454	-1.56587	1	0.12185	0.999263	no	GLIP1 (GDSL LIPASE1); carboxylesterase/ lipase
XLOC_020482	Prupe.6G230300	Pp06:23338284-23339889	G	F	OK	1.83484	1.17833	-0.638908	1.56908	1	0.12205	0.999263	no	NA
XLOC_010596	Prupe.3G289800	Pp03:26027253-26033066	G	F	OK	11.2955	8.30081	-0.444419	1.5257	1	0.1221	0.999263	no	unknown protein
XLOC_021656	Prupe.7G093800	Pp07:12640328-12657497	G	F	OK	13.045	9.92202	-0.394792	1.54355	1	0.1221	0.999263	no	EMB2016 (embryo defective 2016)
XLOC_025830	Prupe.8G131500	Pp08:15389310-15391902	G	F	OK	83.1222	63.0988	-0.39762	1.55241	1	0.1221	0.999263	no	leucine-rich repeat family protein
XLOC_025925	Prupe.8G148800	Pp08:16315909-16316401	G	F	OK	0.20215	0.881991	2.12534	-1.82995	1	0.1221	0.999263	no	NA
XLOC_018213	Prupe.6G137400	Pp06:11140766-11143238	G	F	OK	993.63	1340.27	0.431741	-1.53469	1	0.12215	0.999263	no	PSAO (photosystem I subunit O)
XLOC_025034	Prupe.8G236100	Pp08:20875627-20881357	G	F	OK	10.0747	13.4161	0.413221	-1.55292	1	0.1224	0.999263	no	SULTR3;1 (SULFATE TRANSPORTER 3;1); secondary active sulfate transmembrane transporter/ sulfate transmembrane transporter/ transporter
XLOC_017645	Prupe.6G026700	Pp06:2100007-2110035	G	F	OK	14.8604	11.2027	-0.407625	1.52395	1	0.12245	0.999263	no	unknown protein
XLOC_009795	Prupe.3G138400	Pp03:14596557-14603558	G	F	OK	11.9032	9.01783	-0.400497	1.56138	1	0.12255	0.999263	no	ATGSL05 (GLUCAN SYNTHASE-LIKE 5); 1,3-beta-glucan synthase/ transferase, transferring glycosyl groups
XLOC_002383	Prupe.1G456600	Pp01:38284211-38286339	G	F	OK	4.59137	6.37661	0.473866	-1.54757	1	0.1226	0.999263	no	unknown protein
XLOC_010512	Prupe.3G271700	Pp03:25236492-25238960	G	F	OK	5.70318	4.07142	-0.486236	1.54138	1	0.1226	0.999263	no	PIN8 (PIN-FORMED 8); auxin:hydrogen symporter/ transporter
XLOC_019897	Prupe.6G106400	Pp06:7558598-7563970	G	F	OK	4.96817	3.63781	-0.449645	1.5094	1	0.1226	0.999263	no	unknown protein
XLOC_004852	Prupe.1G381200	Pp01:34341013-34345688	G	F	OK	0.271799	0.136309	-0.995658	1.60243	1	0.12265	0.999263	no	unknown protein
XLOC_011177	Prupe.3G087200	Pp03:6467639-6470062	G	F	OK	8.95073	12.0663	0.430904	-1.52175	1	0.12265	0.999263	no	FAD5 (FATTY ACID DESATURASE 5); 16:0 monogalactosyldiacylglycerol desaturase/ oxidoreductase
XLOC_014373	Prupe.4G129300	Pp04:7134567-7136568	G	F	OK	0.490144	0.245151	-0.999535	1.60867	1	0.12265	0.999263	no	LOCATED IN: endomembrane system; CONTAINS InterPro DOMAIN/s: X8 (InterPro:IPR012946); BEST Arabidopsis thaliana protein match is: glycosyl hydrolase family protein 17 (TAIR:AT5G67460.1); Has 4247 Blast hits to 3762 proteins in 375 species: Archae - 10; Bacteria - 432; Metazoa - 1406; Fungi - 619; Plants - 1140; Viruses - 87; Other Eukaryotes - 553 (source: NCBI BLink).
XLOC_026585	Prupe.I005800	scaffold_71:8939-10574	G	F	OK	29.9051	22.6124	-0.403282	1.53443	1	0.1229	0.999263	no	TT4 (TRANSPARENT TESTA 4); naringenin-chalcone synthase
XLOC_014284	Prupe.4G108000	Pp04:5639803-5643302	G	F	OK	0.510216	0.301877	-0.757146	1.54816	1	0.12295	0.999263	no	AGO2 (argonaute 2); nucleic acid binding
XLOC_013503	Prupe.4G239700	Pp04:15750906-15753330	G	F	OK	0.712159	0.405161	-0.813707	1.54098	1	0.12315	0.999263	no	QRT1 (QUARTET 1); pectinesterase
XLOC_000254	Prupe.1G043400	Pp01:3106979-3112505	G	F	OK	0.731996	1.1202	0.613847	-1.5028	1	0.1232	0.999263	no	unknown protein
XLOC_003843	Prupe.1G170700	Pp01:14075167-14076242	G	F	OK	0.515796	1.01052	0.970228	-1.60084	1	0.1232	0.999263	no	unknown protein
XLOC_020480	Prupe.6G229700	Pp06:23297674-23299493	G	F	OK	6.14903	4.39114	-0.485764	1.51334	1	0.1232	0.999263	no	CYCD3;2 (CYCLIN D3;2); cyclin-dependent protein kinase
XLOC_004866	Prupe.1G385900	Pp01:34594926-34597370	G	F	OK	0.186501	0.378142	1.01975	-1.55869	1	0.1233	0.999263	no	FUNCTIONS IN: molecular_function unknown; INVOLVED IN: biological_process unknown; LOCATED IN: chloroplast; EXPRESSED IN: 23 plant structures; EXPRESSED DURING: 13 growth stages; CONTAINS InterPro DOMAIN/s: Uncharacterised conserved protein UCP022348 (InterPro:IPR016804), Uncharacterised protein family UPF0114 (InterPro:IPR005134); BEST Arabidopsis thaliana protein match is: unknown protein (TAIR…
XLOC_007602	Prupe.2G006800	Pp02:663912-664935	G	F	OK	0.37562	0.757409	1.0118	-1.54654	1	0.1233	0.999263	no	NA
XLOC_008412	Prupe.2G188400,Prupe.2G188500	Pp02:22858986-22867548	G	F	OK	0.390812	0.214097	-0.868209	1.49112	1	0.12335	0.999263	no	NA
XLOC_019587	Prupe.6G046600	Pp06:3350304-3355475	G	F	OK	6.522	4.81811	-0.436845	1.50806	1	0.12365	0.999263	no	F-box family protein (FBL3)
XLOC_005002	Prupe.1G418600	Pp01:36281132-36285384	G	F	OK	1.17312	0.775956	-0.596301	1.56648	1	0.1238	0.999263	no	ANT (AINTEGUMENTA); DNA binding / transcription factor
XLOC_012338	Prupe.4G025700	Pp04:1208871-1210459	G	F	OK	58.0469	76.6346	0.400779	-1.54987	1	0.12395	0.999263	no	postsynaptic protein-related
XLOC_021693	Prupe.7G099700	Pp07:13036351-13039392	G	F	OK	2.36212	3.35629	0.506783	-1.51822	1	0.12395	0.999263	no	ILR1 (IAA-LEUCINE RESISTANT 1); IAA-Leu conjugate hydrolase/ IAA-Phe conjugate hydrolase/ metallopeptidase
XLOC_022657	Prupe.7G016200	Pp07:2326723-2327464	G	F	OK	3.2767	5.28941	0.690865	-1.53011	1	0.12405	0.999263	no	NA
XLOC_009469	Prupe.3G077700	Pp03:5733408-5740361	G	F	OK	14.4808	11.0372	-0.39176	1.50874	1	0.12415	0.999263	no	hydrolase, alpha/beta fold family protein
XLOC_018726	Prupe.6G237300	Pp06:23762976-23765547	G	F	OK	1.5136	1.00673	-0.588308	1.56843	1	0.12415	0.999263	no	CCR1 (ARABIDOPSIS THALIANA CRINKLY4 RELATED 1); ATP binding / kinase/ protein kinase/ protein serine/threonine kinase/ receptor
XLOC_014276	Prupe.4G106700	Pp04:5572137-5579222	G	F	OK	1.95187	1.33683	-0.546041	1.49685	1	0.1242	0.999263	no	root hair defective 3 GTP-binding (RHD3) family protein
XLOC_021031	Prupe.6G337800	Pp06:29287048-29289329	G	F	OK	21.2686	28.3339	0.413805	-1.51006	1	0.1242	0.999263	no	unknown protein
XLOC_007332	Prupe.2G285700	Pp02:28231992-28235646	G	F	OK	0.617626	0.356586	-0.792486	1.54628	1	0.1244	0.999263	no	EPC1 (ECTOPICALLY PARTING CELLS); UDP-glucosyltransferase/ transferase, transferring glycosyl groups
XLOC_005337	Prupe.1G489000	Pp01:40703639-40712721	G	F	OK	16.2276	12.423	-0.385433	1.50488	1	0.12445	0.999263	no	zinc finger (CCCH-type) family protein
XLOC_019940	Prupe.6G116600	Pp06:8482590-8485555	G	F	OK	0.0730883	0.264903	1.85775	-1.7149	1	0.12455	0.999263	no	OMR1 (L-O-METHYLTHREONINE RESISTANT 1); L-threonine ammonia-lyase
XLOC_016636	Prupe.5G061800	Pp05:6745842-6747365	G	F	OK	9.86283	13.3259	0.434158	-1.54012	1	0.12465	0.999263	no	ATERF-1 (ETHYLENE RESPONSIVE ELEMENT BINDING FACTOR 1); DNA binding / transcription activator/ transcription factor
XLOC_017729	Prupe.6G041400	Pp06:3060237-3063169	G	F	OK	2.87092	1.97349	-0.540762	1.5365	1	0.12465	0.999263	no	bZIP transcription factor family protein
XLOC_005823	Prupe.2G002400	Pp02:317106-320632	G	F	OK	10.9742	8.11795	-0.434931	1.53432	1	0.1248	0.999263	no	NA
XLOC_012364	Prupe.4G029500	Pp04:1377926-1378641	G	F	OK	186.722	244.721	0.390249	-1.52857	1	0.1248	0.999263	no	HTA10; DNA binding
XLOC_006207	Prupe.2G074100	Pp02:11226467-11233033	G	F	OK	3.58277	5.04535	0.49388	-1.47746	1	0.125	0.999263	no	5'-nucleotidase/ magnesium ion binding
XLOC_004113	Prupe.1G221900	Pp01:23617324-23620499	G	F	OK	32.2176	42.3075	0.393066	-1.53418	1	0.12515	0.999263	no	ACR4 (ACT REPEAT 4); amino acid binding
XLOC_013601	Prupe.4G258100	Pp04:18319320-18324053	G	F	OK	1.71164	1.12541	-0.604926	1.54849	1	0.1252	0.999263	no	condensation domain-containing protein
XLOC_017512	Prupe.5G244600	Pp05:18323102-18326470	G	F	OK	161.898	211.94	0.388569	-1.50695	1	0.1252	0.999263	no	nascent polypeptide-associated complex (NAC) domain-containing protein / BTF3b-like transcription factor, putative
XLOC_021744	Prupe.7G108500	Pp07:13686017-13688172	G	F	OK	10.3999	7.70275	-0.433124	1.54751	1	0.1252	0.999263	no	HSP70 (heat shock protein 70); ATP binding
XLOC_002424	Prupe.1G464500	Pp01:38749838-38773779	G	F	OK	12.6576	9.73261	-0.379102	1.48868	1	0.1254	0.999263	no	unknown protein
XLOC_016383	Prupe.5G008400	Pp05:900014-900882	G	F	OK	0.165721	0.594237	1.84228	-1.70061	1	0.1254	0.999263	no	NA
XLOC_016966	Prupe.5G135300	Pp05:12858831-12859026	G	F	OK	14.7212	5.33622	-1.464	1.65849	1	0.12545	0.999263	no	NA
XLOC_022380	Prupe.7G231100	Pp07:20253060-20254779	G	F	OK	11.8057	15.8285	0.423037	-1.54548	1	0.12545	0.999263	no	AT-HSFC1; DNA binding / transcription factor
XLOC_002295	Prupe.1G438600	Pp01:37312242-37312845	G	F	OK	18.0767	25.0505	0.47071	-1.54504	1	0.12555	0.999263	no	DNAJ heat shock N-terminal domain-containing protein
XLOC_004909	Prupe.1G394300	Pp01:35063188-35066115	G	F	OK	47.0924	62.0129	0.397073	-1.53526	1	0.1257	0.999263	no	unknown protein
XLOC_003425	Prupe.1G086800	Pp01:6469890-6472221	G	F	OK	52.7895	69.0214	0.386793	-1.49529	1	0.1258	0.999263	no	40S ribosomal protein S7 (RPS7A)
XLOC_018602	Prupe.6G214800	Pp06:22258715-22263355	G	F	OK	0.583594	0.348813	-0.742509	1.54029	1	0.12585	0.999263	no	adenine-DNA glycosylase-related / MYH-related
XLOC_024140	Prupe.8G058100	Pp08:7293634-7297369	G	F	OK	0.289179	0.113074	-1.35469	1.63545	1	0.12595	0.999263	no	VND7 (VASCULAR RELATED NAC-DOMAIN PROTEIN 7); transcription activator/ transcription factor/ transcription regulator
XLOC_000108	Prupe.1G020500	Pp01:1447286-1449189	G	F	OK	0.665806	1.07322	0.688765	-1.5318	1	0.12605	0.999263	no	NA
XLOC_009636	Prupe.3G107300	Pp03:8555362-8559001	G	F	OK	32.9366	25.1126	-0.391282	1.52458	1	0.12615	0.999263	no	4CL2 (4-COUMARATE:COA LIGASE 2); 4-coumarate-CoA ligase
XLOC_013042	Prupe.4G157300	Pp04:9007547-9008267	G	F	OK	1.57001	2.6858	0.774577	-1.57556	1	0.12615	0.999263	no	ATSEC1A; FAD binding / catalytic/ electron carrier/ oxidoreductase
XLOC_004825	Prupe.1G376100	Pp01:34091118-34091979	G	F	OK	234.492	308.351	0.395034	-1.53279	1	0.1262	0.999263	no	emb2184 (embryo defective 2184); structural constituent of ribosome
XLOC_017982	Prupe.6G093700	Pp06:6461554-6463099	G	F	OK	6.26056	9.27732	0.567416	-1.55371	1	0.1262	0.999263	no	structural constituent of ribosome
XLOC_023519	Prupe.7G205500	Pp07:18992253-18997466	G	F	OK	3.83948	2.56018	-0.584668	1.54515	1	0.1263	0.999263	no	UDP-glucoronosyl/UDP-glucosyl transferase family protein
XLOC_017541	Prupe.6G003300	Pp06:355455-372240	G	F	OK	18.3472	14.1336	-0.376423	1.46932	1	0.1264	0.999263	no	DEK1 (DEFECTIVE KERNEL 1); calcium-dependent cysteine-type endopeptidase/ cysteine-type endopeptidase
XLOC_024420	Prupe.8G112800	Pp08:14144957-14146536	G	F	OK	0.111621	0.280645	1.33014	-1.58225	1	0.12645	0.999263	no	unknown protein
XLOC_014099	Prupe.4G071300	Pp04:3494731-3495999	G	F	OK	1.73926	2.68992	0.629095	-1.54267	1	0.1265	0.999263	no	unknown protein
XLOC_006455	Prupe.2G122200	Pp02:17911446-17914709	G	F	OK	4.02028	5.50907	0.454511	-1.49938	1	0.12655	0.999263	no	pentatricopeptide (PPR) repeat-containing protein
XLOC_025390	Prupe.8G034900	Pp08:3208672-3211632	G	F	OK	2.72285	1.92183	-0.502633	1.52945	1	0.1266	0.999263	no	disease resistance protein (TIR-NBS-LRR class), putative
XLOC_024980	Prupe.8G223700	Pp08:20196339-20197503	G	F	OK	18.5913	24.7972	0.415551	-1.52752	1	0.1266	0.999263	no	NA
XLOC_023752	Prupe.7G254900	Pp07:21412824-21419707	G	F	OK	2.1101	1.54155	-0.452924	1.47986	1	0.12665	0.999263	no	protein kinase family protein
XLOC_021473	Prupe.7G059000	Pp07:9831678-9836025	G	F	OK	2.49768	1.73417	-0.52635	1.46108	1	0.1267	0.999263	no	NA
XLOC_000402	Prupe.1G070200	Pp01:4978235-4981724	G	F	OK	5.8145	4.24975	-0.452277	1.53704	1	0.12685	0.999263	no	SDE3 (SILENCING DEFECTIVE); RNA helicase
XLOC_021714	Prupe.7G102700	Pp07:13228674-13231401	G	F	OK	16.2838	22.1694	0.445133	-1.47943	1	0.12685	0.999263	no	40S ribosomal protein S14 (RPS14C)
XLOC_010026	Prupe.3G185100	Pp03:19980354-19982486	G	F	OK	0.944432	1.44689	0.615436	-1.54394	1	0.1269	0.999263	no	UGT71B6 (UDP-glucosyl transferase 71B6); UDP-glycosyltransferase/ abscisic acid glucosyltransferase/ transferase, transferring glycosyl groups
XLOC_015821	Prupe.5G137400	Pp05:12956158-12961027	G	F	OK	16.0349	12.151	-0.400145	1.47422	1	0.127	0.999263	no	dehydration-responsive family protein
XLOC_021869	Prupe.7G133600	Pp07:15195412-15197591	G	F	OK	19.3454	25.6398	0.40639	-1.52546	1	0.127	0.999263	no	HSF4 (HEAT SHOCK FACTOR 4); DNA binding / transcription factor/ transcription repressor
XLOC_024932	Prupe.8G214600	Pp08:19732800-19741453	G	F	OK	18.6491	14.355	-0.377548	1.47898	1	0.127	0.999263	no	ATMRP5; ATPase, coupled to transmembrane movement of substances / sulfonylurea receptor
XLOC_021291	Prupe.7G025700	Pp07:4133610-4138523	G	F	OK	6.13332	4.65286	-0.398551	1.47706	1	0.1271	0.999263	no	unknown protein
XLOC_025393	Prupe.8G036000	Pp08:3291691-3294527	G	F	OK	9.21077	12.3321	0.42103	-1.47316	1	0.1271	0.999263	no	adenylate kinase family protein
XLOC_007754	Prupe.2G038400	Pp02:4128499-4131777	G	F	OK	4.15485	6.14013	0.563471	-1.47959	1	0.1272	0.999263	no	NQR (NADPH:QUINONE OXIDOREDUCTASE); FMN reductase
XLOC_024423	Prupe.8G113800	Pp08:14203372-14204733	G	F	OK	180.298	235.185	0.383415	-1.48017	1	0.1272	0.999263	no	MEE14 (maternal effect embryo arrest 14)
XLOC_016668	Prupe.5G070000	Pp05:8412839-8415144	G	F	OK	0.083075	0.338218	2.02547	-1.73578	1	0.12725	0.999263	no	NA
XLOC_018850	Prupe.6G263400	Pp06:25310443-25313665	G	F	OK	2.50719	1.73178	-0.53382	1.49774	1	0.12735	0.999263	no	LCD1 (LOWER CELL DENSITY 1)
XLOC_011291	Prupe.3G113100	Pp03:9435819-9440654	G	F	OK	0.566798	0.358492	-0.660893	1.44482	1	0.1274	0.999263	no	ATTPS7; alpha,alpha-trehalose-phosphate synthase (UDP-forming)/ transferase, transferring glycosyl groups / trehalose-phosphatase
XLOC_014999	Prupe.4G269700	Pp04:21520053-21521346	G	F	OK	13.5705	18.3019	0.431527	-1.47139	1	0.1274	0.999263	no	molybdopterin biosynthesis MoaE family protein
XLOC_026232	Prupe.8G211000	Pp08:19516937-19519204	G	F	OK	0.297836	0.135778	-1.13327	1.59093	1	0.1275	0.999263	no	flavin-containing monooxygenase family protein / FMO family protein
XLOC_000633	Prupe.1G118600	Pp01:9308687-9311471	G	F	OK	0.278813	0.0345931	-3.01074	2.35565	1	0.12755	0.999263	no	unknown protein
XLOC_017141	Prupe.5G171900	Pp05:14669045-14674357	G	F	OK	9.38881	6.91842	-0.4405	1.48751	1	0.1276	0.999263	no	unknown protein
XLOC_012091	Prupe.3G285900	Pp03:25858070-25865116	G	F	OK	10.0722	7.73303	-0.381268	1.46355	1	0.12765	0.999263	no	haloacid dehalogenase-like hydrolase family protein
XLOC_011524	Prupe.3G162600	Pp03:18165775-18167110	G	F	OK	2.51678	1.62159	-0.634167	1.53526	1	0.1278	0.999263	no	unknown protein
XLOC_017299	Prupe.5G202800	Pp05:16308378-16310777	G	F	OK	7.10468	5.20314	-0.449386	1.51984	1	0.1278	0.999263	no	UDP-glucose 6-dehydrogenase, putative
XLOC_010655	Prupe.3G299600	Pp03:26489482-26492133	G	F	OK	39.4836	51.334	0.378662	-1.46988	1	0.12795	0.999263	no	PUX1 (PLANT UBX DOMAIN-CONTAINING PROTEIN 1)
XLOC_024536	Prupe.8G133500	Pp08:15494072-15495793	G	F	OK	26.7899	20.2574	-0.403243	1.54736	1	0.128	0.999263	no	leucine-rich repeat family protein
XLOC_001255	Prupe.1G244100	Pp01:25756325-25763228	G	F	OK	63.2143	48.2147	-0.390777	1.45366	1	0.12845	0.999263	no	cyclin-related
XLOC_015380	Prupe.5G055500	Pp05:5959929-5962299	G	F	OK	37.6843	49.3924	0.390323	-1.47588	1	0.1285	0.999263	no	60S ribosomal protein L24, putative
XLOC_021721	Prupe.7G104300	Pp07:13360458-13363267	G	F	OK	5.10865	6.99919	0.454245	-1.47229	1	0.12865	0.999263	no	4'-phosphopantetheinyl transferase family protein
XLOC_022489	Prupe.7G252100	Pp07:21284018-21284650	G	F	OK	21.3993	29.0897	0.442943	-1.50473	1	0.12865	0.999263	no	adenylate cyclase
XLOC_011803	Prupe.3G222600	Pp03:22286432-22298984	G	F	OK	31.5971	24.0082	-0.396265	1.51914	1	0.1287	0.999263	no	SDG2 (SET DOMAIN-CONTAINING PROTEIN 2)
XLOC_017829	Prupe.6G062200	Pp06:4310405-4311889	G	F	OK	0.565294	1.1295	0.99861	-1.62614	1	0.1287	0.999263	no	thioesterase family protein
XLOC_006951	Prupe.2G213800	Pp02:24525276-24527755	G	F	OK	17.4959	23.7137	0.438709	-1.53287	1	0.12875	0.999263	no	NA
XLOC_010564	Prupe.3G283800	Pp03:25768227-25769607	G	F	OK	81.4626	106.201	0.382582	-1.49771	1	0.12885	0.999263	no	unknown protein
XLOC_018584	Prupe.6G212000	Pp06:22033580-22036082	G	F	OK	0.228627	0.08521	-1.4239	1.63366	1	0.1289	0.999263	no	basic helix-loop-helix (bHLH) family protein
XLOC_023576	Prupe.7G219400	Pp07:19703594-19706634	G	F	OK	0.169883	0.317414	0.901822	-1.56205	1	0.129	0.999263	no	leucine-rich repeat family protein / protein kinase family protein
XLOC_003196	Prupe.1G030200	Pp01:2157320-2159501	G	F	OK	12.802	17.3163	0.435759	-1.46794	1	0.1291	0.999263	no	NRPE7; DNA-directed RNA polymerase
XLOC_004030	Prupe.1G206000	Pp01:20806793-20813397	G	F	OK	11.1712	15.1092	0.435645	-1.48802	1	0.1292	0.999263	no	FUNCTIONS IN: molecular_function unknown; INVOLVED IN: protein folding, protein transport; LOCATED IN: chloroplast; EXPRESSED IN: 23 plant structures; EXPRESSED DURING: 13 growth stages; CONTAINS InterPro DOMAIN/s: Trigger factor, ribosome-binding, bacterial (InterPro:IPR008881); Has 207 Blast hits to 207 proteins in 55 species: Archae - 0; Bacteria - 110; Metazoa - 0; Fungi - 0; Plants - 22; Vir…
XLOC_024131	Prupe.8G056700	Pp08:6633596-6638321	G	F	OK	0.842158	0.565854	-0.57366	1.47089	1	0.12925	0.999263	no	disease resistance protein (TIR-NBS-LRR class), putative
XLOC_008316	Prupe.2G164400	Pp02:21412031-21413605	G	F	OK	295.641	389.964	0.399497	-1.52046	1	0.12935	0.999263	no	DNA-binding family protein / remorin family protein
XLOC_020151	Prupe.6G160200	Pp06:14773934-14775277	G	F	OK	12.4686	17.0262	0.449465	-1.52571	1	0.1295	0.999263	no	NA
XLOC_017960	Prupe.6G089600	Pp06:6116489-6139919	G	F	OK	7.14771	5.43674	-0.39474	1.49677	1	0.1296	0.999263	no	NA
XLOC_015339	Prupe.5G047900	Pp05:5059971-5062633	G	F	OK	0.268213	0.565259	1.07554	-1.4235	1	0.1297	0.999263	no	NA
XLOC_023970	Prupe.8G027100	Pp08:2472725-2476778	G	F	OK	0.861796	0.552026	-0.642609	1.52939	1	0.12975	0.999263	no	disease resistance protein (TIR-NBS-LRR class), putative
XLOC_022168	Prupe.7G189500,Prupe.7G189600	Pp07:18164063-18179410	G	F	OK	21.6721	16.5356	-0.390265	1.45882	1	0.12995	0.999263	no	NA
XLOC_024970	Prupe.8G221900	Pp08:20115447-20119485	G	F	OK	12.2349	9.1364	-0.4213	1.46664	1	0.12995	0.999263	no	anac074 (Arabidopsis NAC domain containing protein 74); transcription factor
XLOC_007669	Prupe.2G021000	Pp02:2068731-2071591	G	F	OK	1.0364	0.57724	-0.844336	1.5238	1	0.13015	0.999263	no	cinnamyl-alcohol dehydrogenase, putative (CAD)
XLOC_005113	Prupe.1G443400	Pp01:37601735-37603130	G	F	OK	41.2896	54.1932	0.392331	-1.4788	1	0.1302	0.999263	no	FUNCTIONS IN: molecular_function unknown; INVOLVED IN: regulation of translational fidelity; LOCATED IN: chloroplast; EXPRESSED IN: 22 plant structures; EXPRESSED DURING: 13 growth stages; CONTAINS InterPro DOMAIN/s: Glu-tRNAGln amidotransferase, C subunit (InterPro:IPR003837); Has 1227 Blast hits to 1227 proteins in 425 species: Archae - 17; Bacteria - 884; Metazoa - 0; Fungi - 0; Plants - 17; V…
XLOC_004872	Prupe.1G386800	Pp01:34632016-34634447	G	F	OK	195.077	257.994	0.403297	-1.47433	1	0.1303	0.999263	no	CYP82C4; electron carrier/ heme binding / iron ion binding / monooxygenase/ oxygen binding
XLOC_017607	Prupe.6G015700	Pp06:1127813-1130837	G	F	OK	1.62038	2.42984	0.584534	-1.50426	1	0.1303	0.999263	no	transcription factor jumonji (jmjC) domain-containing protein
XLOC_015091	Prupe.5G000400	Pp05:168802-172817	G	F	OK	8.56562	6.41086	-0.41804	1.50759	1	0.13035	0.999263	no	FUNCTIONS IN: molecular_function unknown; INVOLVED IN: biological_process unknown; LOCATED IN: plasma membrane; EXPRESSED IN: 22 plant structures; EXPRESSED DURING: 13 growth stages; BEST Arabidopsis thaliana protein match is: hydroxyproline-rich glycoprotein family protein (TAIR:AT5G52430.1); Has 280 Blast hits to 160 proteins in 42 species: Archae - 0; Bacteria - 4; Metazoa - 55; Fungi - 17; Pl…
XLOC_013409	Prupe.4G220500	Pp04:13848365-13852385	G	F	OK	13.8173	18.4541	0.417472	-1.50369	1	0.1304	0.999263	no	ATPHB6 (PROHIBITIN 6)
XLOC_006165	Prupe.2G065200	Pp02:8947551-8956125	G	F	OK	19.124	14.7207	-0.37754	1.47006	1	0.1307	0.999263	no	protein kinase family protein / WD-40 repeat family protein
XLOC_005406	Prupe.1G502500	Pp01:41565866-41567360	G	F	OK	0.682589	0.349725	-0.964795	1.54668	1	0.13075	0.999263	no	FLS (FLAVONOL SYNTHASE); flavonol synthase
XLOC_020613	Prupe.6G257800	Pp06:25002529-25004537	G	F	OK	29.5253	38.77	0.39299	-1.4962	1	0.1308	0.999263	no	NA
XLOC_000243	Prupe.1G041600	Pp01:2976883-2978561	G	F	OK	1.25725	2.16424	0.783595	-1.5202	1	0.13085	0.999263	no	FUNCTIONS IN: molecular_function unknown; INVOLVED IN: biological_process unknown; LOCATED IN: cellular_component unknown; EXPRESSED IN: 11 plant structures; EXPRESSED DURING: 6 growth stages; CONTAINS InterPro DOMAIN/s: NTP Pyrophosphohydrolase MazG-related, RS21-C6 (InterPro:IPR011394), EAR (InterPro:IPR009039), NTP pyrophosphohydrolase MazG, putative catalytic core (InterPro:IPR004518); Has 57…
XLOC_024651	Prupe.8G159900	Pp08:16882215-16892894	G	F	OK	2.72181	2.04069	-0.415505	1.47496	1	0.13085	0.999263	no	EXPRESSED IN: 13 plant structures; EXPRESSED DURING: 6 growth stages; CONTAINS InterPro DOMAIN/s: Nucleolar 27S pre-rRNA processing, Urb2/Npa2 (InterPro:IPR018849); Has 31 Blast hits to 27 proteins in 14 species: Archae - 0; Bacteria - 2; Metazoa - 3; Fungi - 0; Plants - 19; Viruses - 3; Other Eukaryotes - 4 (source: NCBI BLink).
XLOC_000902	Prupe.1G169400	Pp01:13871376-13876055	G	F	OK	0.754089	0.478887	-0.655048	1.53441	1	0.13095	0.999263	no	NA
XLOC_009607	Prupe.3G101900	Pp03:7919236-7922905	G	F	OK	11.2378	8.37864	-0.423577	1.51958	1	0.13105	0.999263	no	HCT (HYDROXYCINNAMOYL-COA SHIKIMATE/QUINATE HYDROXYCINNAMOYL TRANSFERASE); quinate O-hydroxycinnamoyltransferase/ shikimate O-hydroxycinnamoyltransferase/ transferase
XLOC_007323	Prupe.2G284400	Pp02:28175193-28176179	G	F	OK	0.736281	1.55878	1.08209	-1.57635	1	0.13115	0.999263	no	NA
XLOC_012061	Prupe.3G279900	Pp03:25590110-25591277	G	F	OK	38.996	52.5556	0.430519	-1.51627	1	0.1312	0.999263	no	heavy-metal-associated domain-containing protein
XLOC_026250	Prupe.8G215000	Pp08:19750488-19758953	G	F	OK	133.064	177.082	0.412299	-1.48749	1	0.1312	0.999263	no	PSB28 (PHOTOSYSTEM II REACTION CENTER PSB28 PROTEIN)
XLOC_007346	Prupe.2G287700	Pp02:28324853-28331816	G	F	OK	3.81447	5.5141	0.531643	-1.45824	1	0.13165	0.999263	no	iron ion binding / oxidoreductase, acting on paired donors, with incorporation or reduction of molecular oxygen, 2-oxoglutarate as one donor, and incorporation of one atom each of oxygen into both donors
XLOC_014410	Prupe.4G138200	Pp04:7693173-7696786	G	F	OK	0.857458	0.435876	-0.976148	1.53867	1	0.13195	0.999263	no	LBD4 (LOB DOMAIN-CONTAINING PROTEIN 4)
XLOC_006581	Prupe.2G144300	Pp02:20141118-20143258	G	F	OK	65.5661	85.5925	0.384534	-1.4936	1	0.132	0.999263	no	60S ribosomal protein L22-2 (RPL22B)
XLOC_012072	Prupe.3G281800	Pp03:25676205-25679664	G	F	OK	3.76578	2.70741	-0.476038	1.45136	1	0.13205	0.999263	no	NHL repeat-containing protein
XLOC_003272	Prupe.1G051700	Pp01:3617550-3619127	G	F	OK	0.613855	0.296347	-1.05061	1.53686	1	0.13215	0.999263	no	NA
XLOC_009651	Prupe.3G110400	Pp03:9076036-9077171	G	F	OK	1.05256	1.70133	0.692752	-1.48399	1	0.1322	0.999263	no	F-box family protein
XLOC_004095	Prupe.1G218400	Pp01:23335646-23336567	G	F	OK	1.99208	3.14661	0.659525	-1.50918	1	0.1323	0.999263	no	NA
XLOC_016035	Prupe.5G180500	Pp05:15143940-15147417	G	F	OK	26.8107	34.8971	0.380299	-1.47762	1	0.1323	0.999263	no	ARR6 (RESPONSE REGULATOR 6); transcription regulator/ two-component response regulator
XLOC_000956	Prupe.1G179500	Pp01:15478843-15485000	G	F	OK	4.77625	6.23668	0.3849	-1.44604	1	0.13255	0.999263	no	NA
XLOC_018585	Prupe.6G212100	Pp06:22040649-22043959	G	F	OK	0.259179	0.116043	-1.15929	1.56717	1	0.1326	0.999263	no	HKL3 (HEXOKINASE-LIKE 3); ATP binding / fructokinase/ glucokinase/ hexokinase
XLOC_011689	Prupe.3G195400	Pp03:20664749-20672288	G	F	OK	13.3254	10.1335	-0.395054	1.50437	1	0.13275	0.999263	no	unknown protein
XLOC_018739	Prupe.6G239600	Pp06:23893328-23895542	G	F	OK	150.811	197.274	0.387463	-1.51271	1	0.13275	0.999263	no	NA
XLOC_020888	Prupe.6G313200	Pp06:28020757-28022778	G	F	OK	13.5085	18.0296	0.416505	-1.51154	1	0.1328	0.999263	no	unknown protein
XLOC_023883	Prupe.8G008400	Pp08:639197-640367	G	F	OK	1.22668	2.07423	0.757816	-1.51628	1	0.1329	0.999263	no	complex 1 family protein / LVR family protein
XLOC_010162	Prupe.3G207500	Pp03:21398579-21401237	G	F	OK	0.390511	0.0619368	-2.65649	2.0456	1	0.13295	0.999263	no	unknown protein
XLOC_020352	Prupe.6G203900	Pp06:21163603-21166356	G	F	OK	1.33236	0.82618	-0.689457	1.47091	1	0.1331	0.999263	no	transferase, transferring glycosyl groups
XLOC_018637	Prupe.6G222300	Pp06:22738428-22741000	G	F	OK	3.27783	2.30847	-0.505806	1.47235	1	0.1332	0.999263	no	glycosyl hydrolase family protein 17
XLOC_022406	Prupe.7G236200	Pp07:20516299-20518754	G	F	OK	2.00885	2.81315	0.485817	-1.48136	1	0.1332	0.999263	no	pentatricopeptide (PPR) repeat-containing protein
XLOC_000961	Prupe.1G180300	Pp01:15686685-15689852	G	F	OK	1.38321	0.949503	-0.542772	1.50771	1	0.13325	0.999263	no	NA
XLOC_021265	Prupe.7G020700	Pp07:3053581-3059760	G	F	OK	0.717022	0.429606	-0.739002	1.51219	1	0.1333	0.999263	no	zinc ion binding
XLOC_000768	Prupe.1G141000	Pp01:11093797-11097201	G	F	OK	41.7156	54.3817	0.382536	-1.45621	1	0.13345	0.999263	no	zinc finger (C3HC4-type RING finger) family protein
XLOC_001884	Prupe.1G363300	Pp01:33404279-33408983	G	F	OK	7.0717	5.32968	-0.408008	1.53623	1	0.1335	0.999263	no	CLV1 (CLAVATA 1); ATP binding / kinase/ protein serine/threonine kinase/ receptor signaling protein serine/threonine kinase
XLOC_006013	Prupe.2G039800	Pp02:4342433-4344491	G	F	OK	3.00869	2.1063	-0.514425	1.51473	1	0.13355	0.999263	no	dynamin family protein
XLOC_004722	Prupe.1G354300	Pp01:32909908-32911251	G	F	OK	0.109215	0.304504	1.47929	-1.60598	1	0.1336	0.999263	no	NA
XLOC_023395	Prupe.7G180100	Pp07:17664133-17668152	G	F	OK	0.0822887	0.284212	1.7882	-1.39824	1	0.1337	0.999263	no	NA
XLOC_014222	Prupe.4G096600	Pp04:4852683-4854290	G	F	OK	11.9778	8.92425	-0.424555	1.49827	1	0.13385	0.999263	no	FAD-binding domain-containing protein
XLOC_017746	Prupe.6G043600	Pp06:3178065-3180606	G	F	OK	14.1658	10.6252	-0.414923	1.52545	1	0.134	0.999263	no	endo/excinuclease amino terminal domain-containing protein
XLOC_006770	Prupe.2G178100	Pp02:22268315-22269180	G	F	OK	15.4941	10.8907	-0.50863	1.49045	1	0.1343	0.999263	no	LEA14 (LATE EMBRYOGENESIS ABUNDANT 14)
XLOC_021039	Prupe.6G339000	Pp06:29365759-29366931	G	F	OK	2.69625	5.49238	1.02648	-1.53675	1	0.1343	0.999263	no	NA
XLOC_004761	Prupe.1G363000	Pp01:33369797-33375210	G	F	OK	10.8722	8.29244	-0.39078	1.50613	1	0.13435	0.999263	no	PGP13 (P-GLYCOPROTEIN 13); ATPase, coupled to transmembrane movement of substances
XLOC_015206	Prupe.5G021200	Pp05:2328242-2329370	G	F	OK	173.748	127.031	-0.451816	1.48382	1	0.13435	0.999263	no	NA
XLOC_003599	Prupe.1G118200	Pp01:9293134-9294578	G	F	OK	4.04895	2.81775	-0.523003	1.48611	1	0.13475	0.999263	no	unknown protein
XLOC_011698	Prupe.3G197600	Pp03:20779797-20784450	G	F	OK	87.7534	116.524	0.409105	-1.47383	1	0.135	0.999263	no	unknown protein
XLOC_017866	Prupe.6G071500	Pp06:4881619-4882682	G	F	OK	23.8152	31.6432	0.410011	-1.50685	1	0.135	0.999263	no	unknown protein
XLOC_019924	Prupe.6G113200	Pp06:8165029-8168456	G	F	OK	126.583	164.863	0.381193	-1.48909	1	0.135	0.999263	no	RPL9 (RIBOSOMAL PROTEIN L9); structural constituent of ribosome
XLOC_024691	Prupe.8G165200	Pp08:17185697-17189928	G	F	OK	6.89746	5.1737	-0.414869	1.46294	1	0.135	0.999263	no	protein kinase family protein
XLOC_022365	Prupe.7G226500	Pp07:20054918-20057971	G	F	OK	1.00071	0.577027	-0.794309	1.53299	1	0.13505	0.999263	no	ROP9 (RHO-RELATED PROTEIN FROM PLANTS 9); GTP binding
XLOC_001298	Prupe.1G252600	Pp01:26368407-26375041	G	F	OK	0.241108	0.102758	-1.23043	1.50627	1	0.1351	0.999263	no	DNA binding / transcription factor
XLOC_022279	Prupe.7G210700	Pp07:19278011-19280911	G	F	OK	1.09325	0.702583	-0.637879	1.50058	1	0.13515	0.999263	no	NA
XLOC_001222	Prupe.1G238500	Pp01:25314688-25317408	G	F	OK	36.2583	46.8994	0.371259	-1.44034	1	0.1355	0.999263	no	zinc finger (C3HC4-type RING finger) family protein
XLOC_015244	Prupe.5G027700	Pp05:3232499-3237515	G	F	OK	0.51014	0.320558	-0.670308	1.5075	1	0.13565	0.999263	no	CSLD3 (CELLULOSE SYNTHASE-LIKE D3); cellulose synthase/ transferase, transferring glycosyl groups
XLOC_017269	Prupe.5G195500	Pp05:15855054-15856656	G	F	OK	513.792	679.552	0.403401	-1.50033	1	0.13565	0.999263	no	NDF6 (NDH DEPENDENT FLOW 6)
XLOC_021695	Prupe.7G099900	Pp07:13055067-13057555	G	F	OK	14.0015	18.4079	0.39475	-1.49378	1	0.13565	0.999263	no	NA
XLOC_023755	Prupe.7G255800	Pp07:21442198-21445867	G	F	OK	27.6645	36.0251	0.38097	-1.44679	1	0.13565	0.999263	no	protein phosphatase 2C, putative / PP2C, putative
XLOC_026442	Prupe.8G254800	Pp08:21762005-21766088	G	F	OK	5.07909	3.73206	-0.444599	1.45332	1	0.13575	0.999263	no	phototropic-responsive NPH3 family protein
XLOC_014825	Prupe.4G233900	Pp04:15091720-15092659	G	F	OK	42.08	55.6054	0.402091	-1.43893	1	0.1359	0.999263	no	unknown protein
XLOC_011313	Prupe.3G118100	Pp03:10143269-10147179	G	F	OK	0.0479531	0.266681	2.47542	-1.6366	1	0.136	0.999263	no	LSH10 (LIGHT SENSITIVE HYPOCOTYLS 10)
XLOC_024515	Prupe.8G129800	Pp08:15297220-15298868	G	F	OK	0.996286	0.608798	-0.710596	1.47714	1	0.136	0.999263	no	UGT73B3 (UDP-glucosyl transferase 73B3); UDP-glycosyltransferase/ abscisic acid glucosyltransferase/ quercetin 3-O-glucosyltransferase/ transferase, transferring hexosyl groups
XLOC_023230	Prupe.7G141100	Pp07:15646041-15648166	G	F	OK	9.82092	13.2226	0.429079	-1.49715	1	0.13615	0.999263	no	MES3 (METHYL ESTERASE 3); hydrolase, acting on ester bonds / methyl indole-3-acetate esterase/ methyl jasmonate esterase
XLOC_023649	Prupe.7G232500	Pp07:20324121-20326603	G	F	OK	18.2952	24.1301	0.399364	-1.44797	1	0.1362	0.999263	no	peroxisomal membrane 22 kDa family protein
XLOC_016706	Prupe.5G079700	Pp05:9355314-9359355	G	F	OK	55.6345	72.5996	0.383981	-1.44958	1	0.13625	0.999263	no	translation release factor
XLOC_020676	Prupe.6G269700	Pp06:25636408-25638968	G	F	OK	2.01935	1.38708	-0.54184	1.43065	1	0.13635	0.999263	no	reticulon family protein (RTNLB12)
XLOC_021799	Prupe.7G120500	Pp07:14396637-14399393	G	F	OK	7.68343	5.74852	-0.418559	1.49108	1	0.13645	0.999263	no	leucine-rich repeat transmembrane protein kinase, putative
XLOC_020175	Prupe.6G164200	Pp06:15989494-15991987	G	F	OK	30.6155	23.0299	-0.410758	1.49233	1	0.1365	0.999263	no	YLS8; catalytic
XLOC_026224	Prupe.8G209400	Pp08:19440865-19452046	G	F	OK	22.8691	17.6714	-0.371981	1.4462	1	0.13655	0.999263	no	CLASP (CLIP-ASSOCIATED PROTEIN); binding
XLOC_011775	Prupe.3G216700	Pp03:21885886-21891261	G	F	OK	4.9145	3.51552	-0.483309	1.44549	1	0.1366	0.999263	no	AT-AER (alkenal reductase); 2-alkenal reductase
XLOC_012417	Prupe.4G038900	Pp04:1825162-1827520	G	F	OK	17.4329	12.8552	-0.439464	1.49771	1	0.1367	0.999263	no	BFN1 (BIFUNCTIONAL NUCLEASE I); T/G mismatch-specific endonuclease/ endoribonuclease, producing 5'-phosphomonoesters / nucleic acid binding / single-stranded DNA specific endodeoxyribonuclease
XLOC_001284	Prupe.1G250300	Pp01:26241025-26243626	G	F	OK	73.5088	95.107	0.371634	-1.43596	1	0.13675	0.999263	no	NRPB10; DNA binding / DNA-directed RNA polymerase
XLOC_022646	Prupe.7G013900	Pp07:1953063-1958262	G	F	OK	1.02346	0.710716	-0.526108	1.48507	1	0.13685	0.999263	no	no apical meristem (NAM) family protein
XLOC_000821	Prupe.1G151700	Pp01:11967936-11971616	G	F	OK	3.69071	2.7358	-0.431937	1.44873	1	0.1371	0.999263	no	heavy-metal-associated domain-containing protein
XLOC_011090	Prupe.3G068400	Pp03:4925015-4930204	G	F	OK	3.62065	2.60813	-0.473232	1.44421	1	0.13715	0.999263	no	unknown protein
XLOC_006145	Prupe.2G061100	Pp02:7753182-7757806	G	F	OK	35.502	46.0602	0.375622	-1.46176	1	0.1372	0.999263	no	mannose 6-phosphate reductase (NADPH-dependent), putative
XLOC_017266	Prupe.5G195100	Pp05:15839307-15840574	G	F	OK	2009.1	2784.87	0.471061	-1.48463	1	0.1374	0.999263	no	LHCA4 (LIGHT-HARVESTING CHLOROPHYLL-PROTEIN COMPLEX I SUBUNIT A4); chlorophyll binding
XLOC_009691	Prupe.3G117900	Pp03:10085993-10087442	G	F	OK	2.70109	3.9834	0.560461	-1.4858	1	0.13755	0.999263	no	unknown protein
XLOC_014275	Prupe.4G106600	Pp04:5556448-5570664	G	F	OK	1.1	0.765797	-0.52247	1.38932	1	0.13755	0.999263	no	NA
XLOC_000271	Prupe.1G046500	Pp01:3296426-3298154	G	F	OK	222.924	293.763	0.3981	-1.51708	1	0.1376	0.999263	no	PGR5 (proton gradient regulation 5); electron carrier
XLOC_013658	Prupe.4G269600	Pp04:21517056-21519910	G	F	OK	1.44553	0.933635	-0.630667	1.49844	1	0.1376	0.999263	no	CYCB1;4 (Cyclin B1;4); cyclin-dependent protein kinase regulator
XLOC_000100	Prupe.1G019200	Pp01:1346048-1347329	G	F	OK	0.374412	0.715943	0.935219	-1.5356	1	0.13765	0.999263	no	NA
XLOC_002289	Prupe.1G436900	Pp01:37242356-37242958	G	F	OK	340.199	442.251	0.378486	-1.46907	1	0.13765	0.999263	no	NA
XLOC_005159	Prupe.1G452000	Pp01:38038011-38044400	G	F	OK	8.04274	6.11314	-0.395775	1.46977	1	0.1377	0.999263	no	PC-MYB1; DNA binding / transcription coactivator/ transcription factor
XLOC_017067	Prupe.5G157800	Pp05:13998178-13999903	G	F	OK	114.545	87.9908	-0.380492	1.48469	1	0.13795	0.999263	no	GDSL-motif lipase/hydrolase family protein
XLOC_016301	Prupe.5G236200	Pp05:17881532-17882701	G	F	OK	42.3443	55.1288	0.38064	-1.47734	1	0.138	0.999263	no	NA
XLOC_017825	Prupe.6G061800	Pp06:4275372-4277277	G	F	OK	16.8231	22.3474	0.409662	-1.49467	1	0.138	0.999263	no	thioesterase family protein
XLOC_018957	Prupe.6G283600	Pp06:26382990-26383839	G	F	OK	0.456507	0.971417	1.08945	-1.54193	1	0.13805	0.999263	no	NA
XLOC_003914	Prupe.1G186200	Pp01:16906083-16910832	G	F	OK	12.9837	17.4454	0.426142	-1.44862	1	0.1383	0.999263	no	COP9 (CONSTITUTIVE PHOTOMORPHOGENIC 9); metalloendopeptidase/ protein binding
XLOC_004339	Prupe.1G271100	Pp01:27818924-27824909	G	F	OK	4.44202	3.29443	-0.431189	1.43837	1	0.1384	0.999263	no	FLP (FOUR LIPS); DNA binding / transcription factor
XLOC_016430	Prupe.5G018900	Pp05:2061001-2080980	G	F	OK	25.0561	19.2916	-0.37719	1.4632	1	0.1384	0.999263	no	HGL1 (heteroglycan glucosidase 1); hydrolase, hydrolyzing O-glycosyl compounds
XLOC_025156	Prupe.8G258000	Pp08:21937746-21938560	G	F	OK	4.23153	6.19496	0.549914	-1.4959	1	0.13845	0.999263	no	RALFL33 (ralf-like 33); signal transducer
XLOC_001273	Prupe.1G247500	Pp01:26032656-26035577	G	F	OK	0.44488	0.212865	-1.06348	1.52144	1	0.1386	0.999263	no	Computational predictions suggested the presence of a small cysteine-rich protein downstream of this gene model (Silverstein 2007), but subsequent analysis revealed that this region contains a tenth exon for the At1g10710 gene which is depicted in the At1g10710.1 gene model.
XLOC_016744	Prupe.5G088800	Pp05:9952577-9953729	G	F	OK	9.7888	13.2096	0.432387	-1.47081	1	0.13865	0.999263	no	TCP family transcription factor, putative
XLOC_015812	Prupe.5G135700	Pp05:12873743-12874574	G	F	OK	40.1462	30.3454	-0.403788	1.4894	1	0.13865	0.999263	no	FUNCTIONS IN: molecular_function unknown; INVOLVED IN: biological_process unknown; LOCATED IN: cellular_component unknown; EXPRESSED IN: 23 plant structures; EXPRESSED DURING: 13 growth stages; BEST Arabidopsis thaliana protein match is: oxidoreductase, acting on NADH or NADPH (TAIR:AT1G75260.1); Has 35 Blast hits to 35 proteins in 7 species: Archae - 0; Bacteria - 0; Metazoa - 0; Fungi - 0; Plan…
XLOC_015154	Prupe.5G011100	Pp05:1135737-1152387	G	F	OK	18.1563	14.0298	-0.371978	1.44085	1	0.13905	0.999263	no	hedgehog receptor
XLOC_008860	Prupe.2G281300	Pp02:27999587-28001599	G	F	OK	90.235	117.448	0.380263	-1.48376	1	0.1392	0.999263	no	ATRPS13A (ARABIDOPSIS THALIANA RIBOSOMAL PROTEIN S13A); structural constituent of ribosome
XLOC_004842	Prupe.1G378800	Pp01:34223994-34225119	G	F	OK	17.5778	23.4501	0.415839	-1.47786	1	0.13955	0.999263	no	ATRL6 (ARABIDOPSIS RAD-LIKE 6); transcription factor
XLOC_016652	Prupe.5G067000	Pp05:8142785-8144529	G	F	OK	5.95081	8.26589	0.474083	-1.48065	1	0.13955	0.999263	no	NA
XLOC_016964	Prupe.5G135100	Pp05:12847241-12852014	G	F	OK	4.59203	3.41268	-0.428227	1.44239	1	0.13955	0.999263	no	unknown protein
XLOC_023413	Prupe.7G183900	Pp07:17834252-17834734	G	F	OK	3.14246	5.17436	0.719487	-1.4907	1	0.13955	0.999263	no	MRPL11 (MITOCHONDRIAL RIBOSOMAL PROTEIN L11); structural constituent of ribosome
XLOC_004461	Prupe.1G296600	Pp01:29293008-29295475	G	F	OK	0.280827	0.500605	0.833991	-1.4851	1	0.1396	0.999263	no	BAS1 (PHYB ACTIVATION TAGGED SUPPRESSOR 1); oxygen binding / steroid hydroxylase
XLOC_020277	Prupe.6G186600	Pp06:19501687-19504280	G	F	OK	27.9553	21.2863	-0.393196	1.49285	1	0.1396	0.999263	no	ANNAT2 (Annexin Arabidopsis 2); calcium ion binding / calcium-dependent phospholipid binding
XLOC_020805	Prupe.6G296300	Pp06:27087578-27092178	G	F	OK	6.57999	4.90933	-0.42256	1.43725	1	0.13965	0.999263	no	leucine-rich repeat transmembrane protein kinase, putative
XLOC_025616	Prupe.8G084800	Pp08:11781160-11786930	G	F	OK	0.566162	0.297305	-0.929271	1.4496	1	0.13965	0.999263	no	IMP4
XLOC_010967	Prupe.3G042700	Pp03:3043298-3046207	G	F	OK	21.3139	27.8578	0.386286	-1.44317	1	0.1399	0.999263	no	binding / catalytic
XLOC_012460	Prupe.4G047200	Pp04:2242857-2248174	G	F	OK	9.58286	7.33847	-0.384978	1.48817	1	0.1399	0.999263	no	GSL1 (GLUCAN SYNTHASE-LIKE 1); 1,3-beta-glucan synthase/ transferase, transferring glycosyl groups
XLOC_002422	Prupe.1G464200	Pp01:38741721-38744340	G	F	OK	4.0539	5.60554	0.467543	-1.45645	1	0.13995	0.999263	no	NA
XLOC_023325	Prupe.7G166400	Pp07:17024227-17025479	G	F	OK	400.094	528.556	0.401719	-1.47296	1	0.1401	0.999263	no	HIS1-3 (HISTONE H1-3); DNA binding / nucleosomal DNA binding
XLOC_002822	Prupe.1G542600	Pp01:44338847-44340650	G	F	OK	137.94	106.253	-0.376534	1.45781	1	0.14025	0.999263	no	TUA2; structural constituent of cytoskeleton
XLOC_010539	Prupe.3G276500	Pp03:25452012-25453053	G	F	OK	0.482342	0.920122	0.931768	-1.52993	1	0.14035	0.999263	no	GATL10 (Galacturonosyltransferase-like 10); polygalacturonate 4-alpha-galacturonosyltransferase/ transferase, transferring hexosyl groups
XLOC_018169	Prupe.6G129600	Pp06:10060916-10061642	G	F	OK	27.0089	35.9881	0.414086	-1.48242	1	0.14035	0.999263	no	NA
XLOC_025341	Prupe.8G024000	Pp08:2180491-2186573	G	F	OK	6.36844	4.87943	-0.384225	1.44361	1	0.14045	0.999263	no	PUR4 (purine biosynthesis 4); ATP binding / catalytic/ phosphoribosylformylglycinamidine synthase
XLOC_018028	Prupe.6G102300	Pp06:7124586-7132245	G	F	OK	23.1771	17.804	-0.380501	1.48558	1	0.1405	0.999263	no	REV (REVOLUTA); DNA binding / lipid binding / transcription factor
XLOC_022935	Prupe.7G078300	Pp07:11422075-11427084	G	F	OK	1.45967	1.03801	-0.491826	1.47086	1	0.14055	0.999263	no	NA
XLOC_005020	Prupe.1G421600	Pp01:36413907-36416638	G	F	OK	7.12492	5.20516	-0.452932	1.46746	1	0.14065	0.999263	no	NA
XLOC_010351	Prupe.3G242600	Pp03:23563899-23565163	G	F	OK	59.0015	80.0466	0.44009	-1.45489	1	0.14065	0.999263	no	MIR414 (MICRORNA 414)
XLOC_006047	Prupe.2G046600	Pp02:5400274-5400697	G	F	OK	4.70585	7.58725	0.689119	-1.49712	1	0.1407	0.999263	no	NA
XLOC_012894	Prupe.4G128900	Pp04:7117595-7118620	G	F	OK	2.75143	4.18152	0.603845	-1.49075	1	0.14075	0.999263	no	NA
XLOC_009011	Prupe.2G314300	Pp02:29570118-29572777	G	F	OK	57.4884	74.4298	0.37261	-1.45042	1	0.14085	0.999263	no	thylakoid lumenal 17.4 kDa protein, chloroplast
XLOC_022252	Prupe.7G206300	Pp07:19026924-19028157	G	F	OK	5.37535	7.40869	0.462858	-1.45189	1	0.14085	0.999263	no	unknown protein
XLOC_018068	Prupe.6G110900	Pp06:7954023-7956242	G	F	OK	4.68903	3.4401	-0.446839	1.46055	1	0.1409	0.999263	no	nodulin family protein
XLOC_020464	Prupe.6G225500	Pp06:22981883-22983441	G	F	OK	0.768191	0.4374	-0.812513	1.48039	1	0.14095	0.999263	no	binding / ubiquitin-protein ligase
XLOC_003901	Prupe.1G183500	Pp01:16249128-16249956	G	F	OK	0.455784	1.12358	1.30169	-1.5484	1	0.141	0.999263	no	NA
XLOC_005545	Prupe.1G530300	Pp01:43345338-43347157	G	F	OK	0.795964	1.25731	0.659561	-1.48439	1	0.14135	0.999263	no	DNA-binding protein-related
XLOC_007909	Prupe.2G074800	Pp02:11308241-11319159	G	F	OK	20.297	15.6526	-0.374865	1.46811	1	0.14155	0.999263	no	FUNCTIONS IN: molecular_function unknown; INVOLVED IN: biological_process unknown; LOCATED IN: cellular_component unknown; EXPRESSED IN: 24 plant structures; EXPRESSED DURING: 14 growth stages; BEST Arabidopsis thaliana protein match is: nucleoporin-related (TAIR:AT5G20200.1); Has 51621 Blast hits to 25162 proteins in 1378 species: Archae - 161; Bacteria - 11485; Metazoa - 15659; Fungi - 10121; P…
XLOC_006746	Prupe.2G172900	Pp02:21944504-21955759	G	F	OK	40.6416	31.3845	-0.372903	1.41142	1	0.1416	0.999263	no	transcription regulatory protein SNF2, putative
XLOC_006208	Prupe.2G074200	Pp02:11234060-11234932	G	F	OK	0.115274	0.383777	1.73521	-1.59313	1	0.1418	0.999263	no	NA
XLOC_022777	Prupe.7G042600	Pp07:7875019-7892220	G	F	OK	15.7218	12.1121	-0.376309	1.45706	1	0.1418	0.999263	no	SH3 domain-containing protein
XLOC_005310	Prupe.1G483200	Pp01:40288489-40295210	G	F	OK	0.337472	0.201155	-0.746461	1.43845	1	0.14185	0.999263	no	ATSPS1F (sucrose phosphate synthase 1F); sucrose-phosphate synthase/ transferase, transferring glycosyl groups
XLOC_002744	Prupe.1G528900	Pp01:43267597-43268565	G	F	OK	0.402818	0.139933	-1.52539	1.63461	1	0.1419	0.999263	no	NA
XLOC_021410	Prupe.7G045800	Pp07:8164740-8166738	G	F	OK	3.26985	2.33204	-0.487636	1.46147	1	0.14195	0.999263	no	unknown protein
XLOC_000493	Prupe.1G085900	Pp01:6379475-6380776	G	F	OK	0.205239	0.482182	1.23227	-1.52382	1	0.1422	0.999263	no	IAA33 (INDOLE-3-ACETIC ACID INDUCIBLE 33); transcription factor
XLOC_002742	Prupe.1G528500	Pp01:43243831-43253468	G	F	OK	4.62999	3.48265	-0.410824	1.48091	1	0.1423	0.999263	no	unknown protein
XLOC_020585	Prupe.6G251900	Pp06:24643067-24644157	G	F	OK	100.933	130.786	0.373817	-1.46429	1	0.1423	0.999263	no	histone H4
XLOC_024345	Prupe.8G098900	Pp08:13056297-13057518	G	F	OK	12.5594	9.25178	-0.440964	1.46697	1	0.1424	0.999263	no	BURP domain-containing protein
XLOC_003132	Prupe.1G016000	Pp01:1141248-1144182	G	F	OK	19.4829	15.0663	-0.37088	1.40978	1	0.1425	0.999263	no	senescence-associated protein-related
XLOC_004123	Prupe.1G223900	Pp01:23769389-23770047	G	F	OK	31.8169	42.1691	0.406393	-1.4588	1	0.14255	0.999263	no	unknown protein
XLOC_003331	Prupe.1G065300	Pp01:4658132-4665858	G	F	OK	21.1524	16.3823	-0.368687	1.42934	1	0.1426	0.999263	no	ARF19 (AUXIN RESPONSE FACTOR 19); DNA binding / transcription factor
XLOC_020044	Prupe.6G140000	Pp06:11343692-11346459	G	F	OK	68.135	88.9048	0.383865	-1.42932	1	0.1426	0.999263	no	unknown protein
XLOC_025058	Prupe.8G240100	Pp08:21071970-21074414	G	F	OK	9.4209	12.6078	0.420381	-1.4267	1	0.1427	0.999263	no	chalcone isomerase
XLOC_012473	Prupe.4G049700	Pp04:2377966-2379456	G	F	OK	0.257859	0.089955	-1.51931	1.62809	1	0.14275	0.999263	no	late embryogenesis abundant domain-containing protein / LEA domain-containing protein
XLOC_023228	Prupe.7G140700	Pp07:15623831-15625505	G	F	OK	10.7246	8.0246	-0.418416	1.43835	1	0.14275	0.999263	no	Dof-type zinc finger domain-containing protein
XLOC_022261	Prupe.7G208100	Pp07:19115585-19118769	G	F	OK	0.174582	0.339442	0.959257	-1.37758	1	0.14285	0.999263	no	unknown protein
XLOC_020651	Prupe.6G264800	Pp06:25375940-25379620	G	F	OK	3.69301	2.71427	-0.444235	1.46158	1	0.14295	0.999263	no	ROPGEF7; Rho guanyl-nucleotide exchange factor
XLOC_016382	Prupe.5G008300	Pp05:867889-873033	G	F	OK	7.42043	5.62989	-0.398395	1.43232	1	0.143	0.999263	no	ATGLR3.3; intracellular ligand-gated ion channel
XLOC_006882	Prupe.2G197500	Pp02:23450286-23459808	G	F	OK	15.3795	11.8652	-0.374267	1.46397	1	0.14305	0.999263	no	binding / protein binding / zinc ion binding
XLOC_014081	Prupe.4G067200	Pp04:3253090-3256390	G	F	OK	0.211295	0.0871042	-1.27844	1.5356	1	0.14325	0.999263	no	PHT2;1 (PHOSPHATE TRANSPORTER 2;1); low affinity phosphate transmembrane transporter
XLOC_001134	Prupe.1G220700	Pp01:23533966-23536346	G	F	OK	1.20163	1.84229	0.616509	-1.46067	1	0.1433	0.999263	no	SAG29 (SENESCENCE-ASSOCIATED PROTEIN 29)
XLOC_026352	Prupe.8G234800	Pp08:20805887-20809375	G	F	OK	1.93787	1.34338	-0.528607	1.47301	1	0.1433	0.999263	no	AtIDD12 (Arabidopsis thaliana Indeterminate(ID)-Domain 12); nucleic acid binding / transcription factor/ zinc ion binding
XLOC_014662	Prupe.4G197500	Pp04:12087299-12090844	G	F	OK	9.59453	7.19939	-0.414338	1.4338	1	0.14335	0.999263	no	BGLU41 (BETA GLUCOSIDASE 41); catalytic/ cation binding / hydrolase, hydrolyzing O-glycosyl compounds
XLOC_016841	Prupe.5G108900	Pp05:11421631-11422237	G	F	OK	120.773	156.812	0.376747	-1.46762	1	0.14335	0.999263	no	FUNCTIONS IN: molecular_function unknown; INVOLVED IN: biological_process unknown; LOCATED IN: plasma membrane; EXPRESSED IN: 15 plant structures; EXPRESSED DURING: 7 growth stages; CONTAINS InterPro DOMAIN/s: Harpin-induced 1 (InterPro:IPR010847); BEST Arabidopsis thaliana protein match is: unknown protein (TAIR:AT3G54200.1); Has 137 Blast hits to 136 proteins in 12 species: Archae - 0; Bacteria…
XLOC_014647	Prupe.4G190500	Pp04:11367293-11369253	G	F	OK	1169.57	1594.08	0.446753	-1.46509	1	0.14345	0.999263	no	LHCB3 (LIGHT-HARVESTING CHLOROPHYLL B-BINDING PROTEIN 3); structural molecule
XLOC_021450	Prupe.7G055000	Pp07:9358090-9361089	G	F	OK	8.11494	10.8614	0.420551	-1.46466	1	0.14345	0.999263	no	NA
XLOC_018586	Prupe.6G212200	Pp06:22050732-22055030	G	F	OK	50.0727	38.5206	-0.378392	1.46744	1	0.1435	0.999263	no	BAM1 (BARELY ANY MERISTEM 1); ATP binding / kinase/ protein serine/threonine kinase
XLOC_000218	Prupe.1G038200	Pp01:2685984-2686616	G	F	OK	0.541756	0.099452	-2.44557	1.85973	1	0.14365	0.999263	no	NA
XLOC_022528	Prupe.7G259100	Pp07:21603813-21607690	G	F	OK	17.6663	23.2441	0.395865	-1.4635	1	0.1438	0.999263	no	unknown protein
XLOC_018659	Prupe.6G226600	Pp06:23090418-23093200	G	F	OK	9.14605	12.0221	0.394464	-1.45542	1	0.1439	0.999263	no	CYP81D8; electron carrier/ heme binding / iron ion binding / monooxygenase/ oxygen binding
XLOC_006594	Prupe.2G146800	Pp02:20307723-20317710	G	F	OK	27.4167	21.2234	-0.369401	1.43991	1	0.1441	0.999263	no	guanine nucleotide exchange family protein
XLOC_025474	Prupe.8G051500	Pp08:5622888-5626125	G	F	OK	0.248929	0.1301	-0.936107	1.39045	1	0.14415	0.999263	no	DNA-binding bromodomain-containing protein
XLOC_009147	Prupe.3G013200	Pp03:938427-942844	G	F	OK	32.3706	41.5404	0.359831	-1.41215	1	0.14445	0.999263	no	phytoene synthase (PSY) / geranylgeranyl-diphosphate geranylgeranyl transferase
XLOC_000866	Prupe.1G159600	Pp01:12690834-12698210	G	F	OK	31.1346	24.005	-0.375182	1.47006	1	0.1446	0.999263	no	disease resistance protein (NBS-LRR class), putative
XLOC_017506	Prupe.5G243300	Pp05:18264716-18265061	G	F	OK	11.0845	16.7637	0.596801	-1.43827	1	0.14475	0.999263	no	INH3 (INHIBITOR-3)
XLOC_006877	Prupe.2G196100	Pp02:23356502-23358221	G	F	OK	16.6831	21.8638	0.390152	-1.46484	1	0.14485	0.999263	no	NA
XLOC_004400	Prupe.1G282200	Pp01:28501189-28502574	G	F	OK	214.927	278.621	0.374459	-1.44948	1	0.1449	0.999263	no	unknown protein
XLOC_005868	Prupe.2G012300	Pp02:1059114-1064075	G	F	OK	2.18374	3.15646	0.531509	-1.37961	1	0.14505	0.999263	no	BB (BIG BROTHER); protein binding / ubiquitin-protein ligase/ zinc ion binding
XLOC_016842	Prupe.5G109000	Pp05:11428887-11429421	G	F	OK	18.6727	25.5214	0.450774	-1.44907	1	0.14505	0.999263	no	FUNCTIONS IN: molecular_function unknown; INVOLVED IN: biological_process unknown; LOCATED IN: plasma membrane; EXPRESSED IN: 15 plant structures; EXPRESSED DURING: 7 growth stages; CONTAINS InterPro DOMAIN/s: Harpin-induced 1 (InterPro:IPR010847); BEST Arabidopsis thaliana protein match is: unknown protein (TAIR:AT3G54200.1); Has 137 Blast hits to 136 proteins in 12 species: Archae - 0; Bacteria…
XLOC_006681	Prupe.2G161600	Pp02:21283392-21285749	G	F	OK	13.6586	18.1391	0.409289	-1.4519	1	0.1451	0.999263	no	short-chain dehydrogenase/reductase (SDR) family protein
XLOC_015041	Prupe.4G279500	Pp04:23589115-23600444	G	F	OK	1.94256	1.34891	-0.52617	1.46293	1	0.1452	0.999263	no	NA
XLOC_005447	Prupe.1G511000	Pp01:42080347-42086135	G	F	OK	46.9984	60.8234	0.372013	-1.40949	1	0.14525	0.999263	no	60S ribosomal protein L30 (RPL30B)
XLOC_021588	Prupe.7G079900	Pp07:11562671-11563905	G	F	OK	84.6582	109.847	0.37577	-1.44377	1	0.14525	0.999263	no	WCRKC1 (WCRKC THIOREDOXIN 1)
XLOC_005266	Prupe.1G473800	Pp01:39354865-39360419	G	F	OK	1.1094	0.765947	-0.534458	1.43797	1	0.14535	0.999263	no	TCX2 (TESMIN/TSO1-LIKE CXC 2); transcription factor
XLOC_005223	Prupe.1G465300	Pp01:38804228-38811583	G	F	OK	4.98563	3.77197	-0.402459	1.41901	1	0.14545	0.999263	no	SWIM zinc finger family protein
XLOC_021917	Prupe.7G144000	Pp07:15798909-15801700	G	F	OK	0.326859	0.0838508	-1.96277	1.69139	1	0.14545	0.999263	no	transcriptional factor B3 family protein
XLOC_002023	Prupe.1G390800	Pp01:34842030-34843343	G	F	OK	1.64093	2.47466	0.592719	-1.4439	1	0.1456	0.999263	no	ethylene-responsive element-binding protein, putative
XLOC_017453	Prupe.5G232500	Pp05:17693031-17694488	G	F	OK	8.98105	6.59545	-0.445413	1.46721	1	0.1458	0.999263	no	ATLP-1
XLOC_024165	Prupe.8G063400	Pp08:9237413-9246020	G	F	OK	0.347219	0.147632	-1.23384	1.51822	1	0.14585	0.999263	no	NA
XLOC_010687	Prupe.3G305500	Pp03:26757148-26761607	G	F	OK	0.974055	0.643188	-0.598762	1.45764	1	0.1459	0.999263	no	ATP binding / ATPase/ nucleoside-triphosphatase/ nucleotide binding
XLOC_024508	Prupe.8G128900	Pp08:15240820-15244527	G	F	OK	0.264622	0.11272	-1.23119	1.51496	1	0.1459	0.999263	no	unknown protein
XLOC_004278	Prupe.1G256900	Pp01:26698749-26700940	G	F	OK	15.8372	11.9241	-0.409433	1.46726	1	0.14595	0.999263	no	unknown protein
XLOC_001821	Prupe.1G351600	Pp01:32706292-32708784	G	F	OK	38.7891	50.6812	0.385797	-1.46932	1	0.14595	0.999263	no	FUNCTIONS IN: molecular_function unknown; INVOLVED IN: biological_process unknown; LOCATED IN: chloroplast; CONTAINS InterPro DOMAIN/s: CHCH (InterPro:IPR010625); Has 224 Blast hits to 224 proteins in 106 species: Archae - 0; Bacteria - 0; Metazoa - 109; Fungi - 94; Plants - 20; Viruses - 0; Other Eukaryotes - 1 (source: NCBI BLink).
XLOC_020839	Prupe.6G302700	Pp06:27447569-27449224	G	F	OK	53.8207	41.4999	-0.375054	1.45352	1	0.14595	0.999263	no	GLP5 (GERMIN-LIKE PROTEIN 5); manganese ion binding / nutrient reservoir
XLOC_008423	Prupe.2G190800	Pp02:23006793-23021648	G	F	OK	7.82333	6.03785	-0.373747	1.43285	1	0.146	0.999263	no	transducin family protein / WD-40 repeat family protein
XLOC_023331	Prupe.7G167300	Pp07:17063641-17066760	G	F	OK	4.26004	5.74563	0.4316	-1.45696	1	0.14625	0.999263	no	NA
XLOC_024498	Prupe.8G127300	Pp08:15132420-15135549	G	F	OK	1.15894	0.79295	-0.547503	1.4492	1	0.14625	0.999263	no	RPP8 (RECOGNITION OF PERONOSPORA PARASITICA 8); nucleotide binding
XLOC_011924	Prupe.3G250000	Pp03:23991114-23994878	G	F	OK	9.44142	6.97925	-0.435931	1.40867	1	0.14655	0.999263	no	BR6OX2 (BRASSINOSTEROID-6-OXIDASE 2); monooxygenase/ oxygen binding
XLOC_021710	Prupe.7G102300	Pp07:13208105-13209916	G	F	OK	56.636	73.6542	0.37905	-1.46606	1	0.14655	0.999263	no	unknown protein
XLOC_006518	Prupe.2G133800	Pp02:19173546-19176938	G	F	OK	0.466171	0.84224	0.853371	-1.42135	1	0.1467	0.999263	no	WRKY family transcription factor
XLOC_003671	Prupe.1G138000	Pp01:10799789-10800668	G	F	OK	0.342211	0.727996	1.08904	-1.49058	1	0.14675	0.999263	no	C2 domain-containing protein
XLOC_019684	Prupe.6G064100	Pp06:4418002-4421607	G	F	OK	0.164724	0.309689	0.910766	-1.41866	1	0.14695	0.999263	no	unknown protein
XLOC_005032	Prupe.1G423900	Pp01:36540947-36546822	G	F	OK	12.3109	9.47559	-0.377649	1.45568	1	0.14705	0.999263	no	NA
XLOC_017216	Prupe.5G186300	Pp05:15422855-15423687	G	F	OK	235.051	304.075	0.371453	-1.44894	1	0.14725	0.999263	no	unknown protein
XLOC_010574	Prupe.3G285200	Pp03:25811913-25820104	G	F	OK	3.82807	2.80944	-0.446337	1.37801	1	0.1475	0.999263	no	kinesin light chain-related
XLOC_025939	Prupe.8G151300	Pp08:16450091-16474578	G	F	OK	25.7038	19.9356	-0.366637	1.4193	1	0.1476	0.999263	no	TOR (TARGET OF RAPAMYCIN); 1-phosphatidylinositol-3-kinase/ protein binding
XLOC_003440	Prupe.1G090300	Pp01:6806287-6810045	G	F	OK	6.72527	5.02976	-0.419101	1.40306	1	0.14765	0.999263	no	MATE efflux protein-related
XLOC_006623	Prupe.2G151900	Pp02:20675231-20680068	G	F	OK	17.3892	13.4295	-0.372789	1.4414	1	0.14765	0.999263	no	XSP1 (xylem serine peptidase 1); identical protein binding / serine-type endopeptidase
XLOC_013165	Prupe.4G179800	Pp04:10649308-10651183	G	F	OK	103.162	80.0378	-0.366152	1.43146	1	0.1477	0.999263	no	plastocyanin-like domain-containing protein
XLOC_007004	Prupe.2G223700	Pp02:25094929-25100619	G	F	OK	29.7343	23.1074	-0.363772	1.41063	1	0.14775	0.999263	no	NA
XLOC_009217	Prupe.3G029500	Pp03:2204428-2208839	G	F	OK	9.79679	7.55352	-0.37516	1.44332	1	0.1478	0.999263	no	leucine-rich repeat transmembrane protein kinase, putative
XLOC_005543	Prupe.1G529900	Pp01:43314843-43319620	G	F	OK	3.46246	4.78068	0.46542	-1.39707	1	0.14785	0.999263	no	ethylene-responsive protein, putative
XLOC_009667	Prupe.3G113400	Pp03:9480406-9481624	G	F	OK	27.3708	35.5406	0.376829	-1.43392	1	0.14795	0.999263	no	unknown protein
XLOC_008851	Prupe.2G279900	Pp02:27943415-27944548	G	F	OK	15.4089	11.5431	-0.416736	1.44752	1	0.1481	0.999263	no	invertase/pectin methylesterase inhibitor family protein / DC 1.2 homolog (FL5-2I22)
XLOC_003537	Prupe.1G107200	Pp01:8599789-8602960	G	F	OK	2.31232	1.53127	-0.594612	1.41731	1	0.14815	0.999263	no	meprin and TRAF homology domain-containing protein / MATH domain-containing protein
XLOC_017322	Prupe.5G207200	Pp05:16535157-16538509	G	F	OK	0.386391	0.190991	-1.01655	1.40938	1	0.14825	0.999263	no	RBL12 (ARABIDOPSIS RHOMBOID-LIKE PROTEIN 12)
XLOC_007154	Prupe.2G251400	Pp02:26586172-26587976	G	F	OK	1.16997	0.723979	-0.692451	1.43466	1	0.14845	0.999263	no	unknown protein
XLOC_011980	Prupe.3G264000	Pp03:24853124-24855079	G	F	OK	1.65649	2.59929	0.649986	-1.44009	1	0.14845	0.999263	no	emp24/gp25L/p24 family protein
XLOC_019709	Prupe.6G068900	Pp06:4726107-4728604	G	F	OK	4.81602	6.54701	0.442995	-1.4457	1	0.14855	0.999263	no	tropinone reductase, putative / tropine dehydrogenase, putative
XLOC_023774	Prupe.7G260000	Pp07:21641764-21645671	G	F	OK	14.0945	18.3985	0.384459	-1.439	1	0.14855	0.999263	no	unknown protein
XLOC_021984	Prupe.7G155200	Pp07:16435961-16438413	G	F	OK	7.71421	10.4604	0.439354	-1.42	1	0.14865	0.999263	no	Maf family protein
XLOC_026454	Prupe.8G258100	Pp08:21938620-21940448	G	F	OK	32.1848	42.3007	0.394302	-1.45571	1	0.1487	0.999263	no	FUNCTIONS IN: molecular_function unknown; INVOLVED IN: biological_process unknown; LOCATED IN: cellular_component unknown; CONTAINS InterPro DOMAIN/s: Heat shock factor binding 1 (InterPro:IPR009643); Has 178 Blast hits to 178 proteins in 62 species: Archae - 0; Bacteria - 0; Metazoa - 122; Fungi - 0; Plants - 37; Viruses - 0; Other Eukaryotes - 19 (source: NCBI BLink).
XLOC_020020	Prupe.6G132700	Pp06:10453253-10453805	G	F	OK	2.39289	3.90438	0.706335	-1.44147	1	0.14875	0.999263	no	FUNCTIONS IN: molecular_function unknown; INVOLVED IN: biological_process unknown; LOCATED IN: cellular_component unknown; EXPRESSED IN: 19 plant structures; EXPRESSED DURING: 13 growth stages; CONTAINS InterPro DOMAIN/s: Water Stress and Hypersensitive response (InterPro:IPR013990), Harpin-induced 1 (InterPro:IPR010847); BEST Arabidopsis thaliana protein match is: unknown protein (TAIR:AT1G52330…
XLOC_005963	Prupe.2G031400	Pp02:3398218-3402772	G	F	OK	3.09828	2.20323	-0.491852	1.44542	1	0.14885	0.999263	no	aspartyl protease family protein
XLOC_003761	Prupe.1G156200	Pp01:12346601-12348788	G	F	OK	3.19099	2.20184	-0.535292	1.4568	1	0.1489	0.999263	no	plastocyanin-like domain-containing protein / mavicyanin, putative
XLOC_012444	Prupe.4G044500	Pp04:2137650-2140870	G	F	OK	32.8272	42.7502	0.381041	-1.44699	1	0.14895	0.999263	no	zinc finger (C3HC4-type RING finger) family protein
XLOC_013040	Prupe.4G156900	Pp04:8982009-8985618	G	F	OK	238.971	309.942	0.375159	-1.44448	1	0.1494	0.999263	no	emb1473 (embryo defective 1473); structural constituent of ribosome
XLOC_021676	Prupe.7G096400	Pp07:12826464-12828528	G	F	OK	14.544	11.093	-0.390771	1.44056	1	0.1501	0.999263	no	unknown protein
XLOC_003262	Prupe.1G048700	Pp01:3428679-3430710	G	F	OK	0.440677	0.728108	0.724431	-1.46748	1	0.15025	0.999263	no	pentatricopeptide (PPR) repeat-containing protein
XLOC_010093	Prupe.3G197000	Pp03:20754166-20758058	G	F	OK	5.27886	7.19544	0.446856	-1.40905	1	0.15025	0.999263	no	ATNUDT2 (ARABIDOPSIS THALIANA NUDIX HYDROLASE HOMOLOG 2); ADP-ribose diphosphatase/ NAD or NADH binding / hydrolase
XLOC_000151	Prupe.1G028500	Pp01:2003345-2006552	G	F	OK	36.8857	28.607	-0.36669	1.43234	1	0.15035	0.999263	no	unknown protein
XLOC_015868	Prupe.5G146200	Pp05:13437063-13438596	G	F	OK	32.7759	43.2656	0.400583	-1.42999	1	0.1504	0.999263	no	TIM8; P-P-bond-hydrolysis-driven protein transmembrane transporter
XLOC_021014	Prupe.6G335000	Pp06:29107848-29111189	G	F	OK	102.368	133.99	0.388355	-1.40907	1	0.1504	0.999263	no	CSD1 (COPPER/ZINC SUPEROXIDE DISMUTASE 1); superoxide dismutase
XLOC_002419	Prupe.1G463700	Pp01:38697444-38709385	G	F	OK	10.5412	8.16805	-0.367975	1.43847	1	0.15045	0.999263	no	DCAF1 (DDB1-CUL4 ASSOCIATED FACTOR 1); nucleotide binding
XLOC_021365	Prupe.7G038600	Pp07:7157804-7160194	G	F	OK	3.7716	2.53041	-0.575805	1.42617	1	0.15045	0.999263	no	unknown protein
XLOC_001717	Prupe.1G331000	Pp01:31377503-31382349	G	F	OK	1.65602	1.17125	-0.499677	1.40328	1	0.1505	0.999263	no	ATGH9B1 (ARABIDOPSIS THALIANA GLYCOSYL HYDROLASE 9B1); cellulase/ hydrolase, hydrolyzing O-glycosyl compounds
XLOC_016325	Prupe.5G241500	Pp05:18177162-18185805	G	F	OK	51.2237	39.6959	-0.367821	1.42418	1	0.1505	0.999263	no	AGO1 (ARGONAUTE 1); endoribonuclease/ miRNA binding / protein binding / siRNA binding
XLOC_017779	Prupe.6G051100	Pp06:3581279-3584514	G	F	OK	10.3375	13.7207	0.408465	-1.41169	1	0.1508	0.999263	no	MEE67 (maternal effect embryo arrest 67); P-P-bond-hydrolysis-driven protein transmembrane transporter/ protein transporter
XLOC_024925	Prupe.8G213300	Pp08:19630129-19632381	G	F	OK	4.63724	3.41911	-0.439646	1.42475	1	0.15095	0.999263	no	unknown protein
XLOC_024926	Prupe.8G213500	Pp08:19644946-19653777	G	F	OK	0.542838	0.358089	-0.600202	1.30987	1	0.151	0.999263	no	FUNCTIONS IN: molecular_function unknown; INVOLVED IN: biological_process unknown; LOCATED IN: cellular_component unknown; EXPRESSED IN: 15 plant structures; EXPRESSED DURING: 8 growth stages; CONTAINS InterPro DOMAIN/s: uDENN (InterPro:IPR005113), dDENN (InterPro:IPR005112), DENN (InterPro:IPR001194); BEST Arabidopsis thaliana protein match is: DENN (AEX-3) domain-containing protein (TAIR:AT5G35…
XLOC_015939	Prupe.5G159800	Pp05:14123309-14126553	G	F	OK	78.462	101.552	0.372155	-1.45314	1	0.15105	0.999263	no	haloacid dehalogenase-like hydrolase family protein
XLOC_004139	Prupe.1G226800	Pp01:24013088-24019786	G	F	OK	3.63094	2.65534	-0.451447	1.40208	1	0.1511	0.999263	no	MAP65-8 (MICROTUBULE-ASSOCIATED PROTEIN 65-8)
XLOC_014429	Prupe.4G142200	Pp04:8161218-8162191	G	F	OK	0.924248	1.65929	0.844216	-1.45504	1	0.1511	0.999263	no	NA
XLOC_020624	Prupe.6G259200	Pp06:25045184-25049494	G	F	OK	100.621	130.844	0.378922	-1.40128	1	0.1511	0.999263	no	OHP (ONE HELIX PROTEIN)
XLOC_022931	Prupe.7G077300	Pp07:11370171-11373189	G	F	OK	10.1836	7.70205	-0.402934	1.39043	1	0.1512	0.999263	no	ACT11 (actin-11); structural constituent of cytoskeleton
XLOC_014069	Prupe.4G064400	Pp04:3094952-3099851	G	F	OK	1.61857	1.16581	-0.473388	1.42468	1	0.1513	0.999263	no	NA
XLOC_020607	Prupe.6G256700	Pp06:24945549-24948673	G	F	OK	7.96806	5.9452	-0.422503	1.43868	1	0.15145	0.999263	no	ATRBL1 (Arabidopsis thaliana Rhomboid-like 1)
XLOC_002238	Prupe.1G429300	Pp01:36839634-36842568	G	F	OK	33.2565	42.868	0.366268	-1.43476	1	0.1515	0.999263	no	SLY1 (SLEEPY1)
XLOC_005195	Prupe.1G459600	Pp01:38471992-38472193	G	F	OK	8.77007	2.33177	-1.91116	1.62908	1	0.1516	0.999263	no	unknown protein
XLOC_014335	Prupe.4G119400	Pp04:6464638-6466625	G	F	OK	59.8108	77.3127	0.3703	-1.44381	1	0.15165	0.999263	no	FK506-binding protein 1 (FKBP13)
XLOC_015801	Prupe.5G133200	Pp05:12760266-12761871	G	F	OK	5.70991	7.69741	0.430906	-1.43756	1	0.15175	0.999263	no	unknown protein
XLOC_024506	Prupe.8G128500	Pp08:15216778-15220132	G	F	OK	0.0941688	0.223841	1.24915	-1.47993	1	0.15175	0.999263	no	unknown protein
XLOC_002417	Prupe.1G463100	Pp01:38661326-38663588	G	F	OK	77.3751	99.3866	0.361183	-1.38775	1	0.1518	0.999263	no	unknown protein
XLOC_005662	Prupe.1G558400	Pp01:45579638-45581645	G	F	OK	0.18756	0.39733	1.08298	-1.3684	1	0.1518	0.999263	no	copper-binding family protein
XLOC_021601	Prupe.7G082600	Pp07:11784477-11785382	G	F	OK	20.9248	7.89488	-1.40622	1.57481	1	0.1521	0.999263	no	NA
XLOC_025248	Prupe.8G006100	Pp08:484746-497813	G	F	OK	32.1981	25.0212	-0.363825	1.42679	1	0.15215	0.999263	no	protein kinase family protein
XLOC_004395	Prupe.1G281500	Pp01:28459846-28462576	G	F	OK	1.88626	1.2881	-0.550281	1.38688	1	0.15225	0.999263	no	transferase, transferring glycosyl groups
XLOC_022850	Prupe.7G058600	Pp07:9787445-9800656	G	F	OK	4.67183	3.51979	-0.408501	1.44431	1	0.1523	0.999263	no	binding
XLOC_013424	Prupe.4G222800	Pp04:13994950-13996784	G	F	OK	8.0407	11.3308	0.494852	-1.41352	1	0.1524	0.999263	no	SWIB complex BAF60b domain-containing protein
XLOC_022438	Prupe.7G242500	Pp07:20792653-20810726	G	F	OK	8.09997	6.2781	-0.367589	1.42114	1	0.15245	0.999263	no	unknown protein
XLOC_002685	Prupe.1G516500	Pp01:42487431-42488350	G	F	OK	0.869837	1.51533	0.800817	-1.44686	1	0.1525	0.999263	no	NA
XLOC_026074	Prupe.8G178600	Pp08:17975443-17993980	G	F	OK	38.3625	29.8754	-0.360738	1.39338	1	0.1526	0.999263	no	hedgehog receptor
XLOC_000425	Prupe.1G074400	Pp01:5331903-5336485	G	F	OK	8.37441	11.1228	0.409466	-1.36431	1	0.15275	0.999263	no	basic helix-loop-helix (bHLH) family protein
XLOC_025670	Prupe.8G093600	Pp08:12647184-12649071	G	F	OK	1.64437	2.43524	0.56653	-1.42625	1	0.15275	0.999263	no	S-adenosyl-L-methionine:carboxyl methyltransferase family protein
XLOC_009118	Prupe.3G007200	Pp03:433988-440711	G	F	OK	73.7349	57.1683	-0.367133	1.42149	1	0.15295	0.999263	no	long-chain-fatty-acid--CoA ligase family protein / long-chain acyl-CoA synthetase family protein
XLOC_017841	Prupe.6G064700	Pp06:4478650-4485294	G	F	OK	29.8967	23.2345	-0.363718	1.40332	1	0.15305	0.999263	no	NA
XLOC_009329	Prupe.3G049900	Pp03:3523040-3528963	G	F	OK	7.52256	5.6153	-0.421859	1.43843	1	0.1534	0.999263	no	FVE; metal ion binding
XLOC_012418	Prupe.4G039000	Pp04:1827924-1832210	G	F	OK	0.875827	0.567098	-0.627049	1.38076	1	0.1536	0.999263	no	NDA1 (ALTERNATIVE NAD(P)H DEHYDROGENASE 1); NADH dehydrogenase
XLOC_014239	Prupe.4G099500	Pp04:5071883-5073491	G	F	OK	1.92655	2.77921	0.528658	-1.44154	1	0.15375	0.999263	no	FAD-binding domain-containing protein
XLOC_010816	Prupe.3G013600	Pp03:957510-958712	G	F	OK	0.10044	0.307054	1.61216	-1.47227	1	0.1539	0.999263	no	ATGSTF12 (ARABIDOPSIS THALIANA GLUTATHIONE S-TRANSFERASE PHI 12); glutathione transferase
XLOC_011435	Prupe.3G144300	Pp03:15680853-15681795	G	F	OK	1.14701	0.637264	-0.847917	1.46399	1	0.154	0.999263	no	tryptophan synthase, alpha subunit, putative
XLOC_015695	Prupe.5G113600	Pp05:11700900-11704566	G	F	OK	8.64478	11.2261	0.376958	-1.36886	1	0.154	0.999263	no	aldose 1-epimerase family protein
XLOC_001849	Prupe.1G356100	Pp01:33023175-33027002	G	F	OK	8.84684	6.67782	-0.405785	1.42761	1	0.15405	0.999263	no	amino acid transporter family protein
XLOC_012158	Prupe.3G301600	Pp03:26599116-26600972	G	F	OK	7.41673	5.53131	-0.423162	1.4405	1	0.15405	0.999263	no	unknown protein
XLOC_013576	Prupe.4G253900	Pp04:17427613-17432448	G	F	OK	4.6058	3.3479	-0.460195	1.41321	1	0.1541	0.999263	no	NA
XLOC_025701	Prupe.8G100100	Pp08:13143246-13160423	G	F	OK	11.0691	8.59506	-0.364962	1.4147	1	0.15415	0.999263	no	ATPI4K ALPHA; 1-phosphatidylinositol 4-kinase/ inositol or phosphatidylinositol kinase
XLOC_020379	Prupe.6G207300	Pp06:21569700-21572354	G	F	OK	5.57582	4.08728	-0.448041	1.41419	1	0.15445	0.999263	no	NA
XLOC_012939	Prupe.4G136900	Pp04:7614693-7624624	G	F	OK	3.00503	2.24263	-0.42219	1.39227	1	0.1545	0.999263	no	leucine-rich repeat family protein / protein kinase family protein
XLOC_022640	Prupe.7G012800	Pp07:1723915-1728432	G	F	OK	8.42273	11.3071	0.424865	-1.41906	1	0.15455	0.999263	no	unknown protein
XLOC_001160	Prupe.1G225600	Pp01:23906599-23907226	G	F	OK	67.2032	87.0319	0.373014	-1.41996	1	0.1546	0.999263	no	NA
XLOC_001302	Prupe.1G253300	Pp01:26416364-26422680	G	F	OK	346.887	447.984	0.368982	-1.37588	1	0.1548	0.999263	no	CA2 (CARBONIC ANHYDRASE 2); carbonate dehydratase/ zinc ion binding
XLOC_021189	Prupe.7G004800	Pp07:541990-553428	G	F	OK	41.6267	32.602	-0.352548	1.36271	1	0.1552	0.999263	no	emb2734 (embryo defective 2734); binding / lyase
XLOC_010975	Prupe.3G044600	Pp03:3202402-3204844	G	F	OK	0.684929	0.431612	-0.66622	1.41592	1	0.15555	0.999263	no	hydroxyproline-rich glycoprotein family protein
XLOC_010753	Prupe.3G000900	Pp03:93287-95008	G	F	OK	26.7259	34.4994	0.368334	-1.4223	1	0.15585	0.999263	no	FUNCTIONS IN: molecular_function unknown; INVOLVED IN: biological_process unknown; LOCATED IN: chloroplast; EXPRESSED IN: 21 plant structures; EXPRESSED DURING: 13 growth stages; CONTAINS InterPro DOMAIN/s: Streptomyces cyclase/dehydrase (InterPro:IPR005031); BEST Arabidopsis thaliana protein match is: unknown protein (TAIR:AT5G08720.1); Has 322 Blast hits to 309 proteins in 56 species: Archae - …
XLOC_003243	Prupe.1G045100	Pp01:3222303-3223645	G	F	OK	139.537	179.258	0.361388	-1.41695	1	0.1559	0.999263	no	50S ribosomal protein L28, chloroplast (CL28)
XLOC_010042	Prupe.3G188600	Pp03:20181195-20182936	G	F	OK	0.0268851	0.210351	2.96792	-2.08327	1	0.1561	0.999263	no	NA
XLOC_020763	Prupe.6G287100	Pp06:26557208-26565246	G	F	OK	13.4376	10.4319	-0.365272	1.40486	1	0.1561	0.999263	no	D-alanine--D-alanine ligase family
XLOC_022836	Prupe.7G055300	Pp07:9411292-9415287	G	F	OK	0.398147	0.746885	0.907584	-1.44342	1	0.1561	0.999263	no	Y14; RNA binding / protein binding
XLOC_012107	Prupe.3G289100	Pp03:26006621-26008688	G	F	OK	0.607056	0.944419	0.637598	-1.41437	1	0.15615	0.999263	no	pentatricopeptide (PPR) repeat-containing protein
XLOC_000842	Prupe.1G155700	Pp01:12300519-12306920	G	F	OK	82.4698	63.4936	-0.377256	1.36862	1	0.15625	0.999263	no	CYCT1;4; cyclin-dependent protein kinase
XLOC_006362	Prupe.2G104700	Pp02:16167335-16170928	G	F	OK	16.9193	22.1925	0.391399	-1.38222	1	0.1563	0.999263	no	NA
XLOC_007627	Prupe.2G012100	Pp02:1049280-1050267	G	F	OK	4.67826	6.70505	0.519278	-1.39739	1	0.15635	0.999263	no	NA
XLOC_010608	Prupe.3G292000	Pp03:26156082-26171638	G	F	OK	6.01612	4.67258	-0.364616	1.3924	1	0.1564	0.999263	no	EMB3012 (embryo defective 3012)
XLOC_019099	Prupe.6G312400	Pp06:27971141-27975789	G	F	OK	1.44739	0.992433	-0.544411	1.38774	1	0.15645	0.999263	no	FUNCTIONS IN: molecular_function unknown; INVOLVED IN: biological_process unknown; LOCATED IN: cellular_component unknown; EXPRESSED IN: 14 plant structures; EXPRESSED DURING: 6 growth stages; CONTAINS InterPro DOMAIN/s: Galactose oxidase/kelch, beta-propeller (InterPro:IPR011043), Kelch repeat type 1 (InterPro:IPR006652), Kelch repeat type 2 (InterPro:IPR011498), Kelch-type beta propeller (Inter…
XLOC_016120	Prupe.5G197600	Pp05:15968255-15969622	G	F	OK	2.08079	1.14239	-0.865078	1.44621	1	0.15655	0.999263	no	NA
XLOC_025575	Prupe.8G076200	Pp08:11039223-11042262	G	F	OK	37.3877	28.8149	-0.375747	1.3708	1	0.15655	0.999263	no	octicosapeptide/Phox/Bem1p (PB1) domain-containing protein
XLOC_010563	Prupe.3G283500	Pp03:25754043-25762118	G	F	OK	89.8063	115.969	0.368851	-1.38091	1	0.15705	0.999263	no	CYP38 (cyclophilin 38); peptidyl-prolyl cis-trans isomerase
XLOC_021828	Prupe.7G126700	Pp07:14799059-14802016	G	F	OK	0.673667	0.407803	-0.724163	1.40528	1	0.15715	0.999263	no	pectate lyase family protein
XLOC_000983	Prupe.1G184800	Pp01:16750529-16751448	G	F	OK	0.968841	1.61419	0.736481	-1.42182	1	0.1572	0.999263	no	NA
XLOC_021954	Prupe.7G150400	Pp07:16187469-16191011	G	F	OK	0.561286	0.361661	-0.634096	1.41318	1	0.15725	0.999263	no	NA
XLOC_003507	Prupe.1G100800	Pp01:8019351-8024324	G	F	OK	7.89792	10.2585	0.377275	-1.37883	1	0.15735	0.999263	no	leucine-rich repeat family protein / protein kinase family protein
XLOC_006083	Prupe.2G051800	Pp02:6022118-6030923	G	F	OK	4.97405	3.75798	-0.404463	1.37877	1	0.15745	0.999263	no	ATSBT5.2; identical protein binding / serine-type endopeptidase
XLOC_011579	Prupe.3G174600	Pp03:19179154-19179985	G	F	OK	156.254	201.213	0.364829	-1.42685	1	0.1577	0.999263	no	CAB1 (CHLOROPHYLL A/B BINDING PROTEIN 1); chlorophyll binding
XLOC_011132	Prupe.3G076900	Pp03:5655236-5659459	G	F	OK	13.1279	10.1891	-0.365606	1.41956	1	0.1578	0.999263	no	unknown protein
XLOC_008486	Prupe.2G201900	Pp02:23827554-23834195	G	F	OK	3.35778	2.54258	-0.401214	1.41244	1	0.1579	0.999263	no	NTL9 (NAC transcription factor-like 9); transcription factor
XLOC_018587	Prupe.6G212500	Pp06:22077525-22079107	G	F	OK	1.44221	0.882238	-0.709046	1.33447	1	0.15795	0.999263	no	NA
XLOC_023760	Prupe.7G257100	Pp07:21509658-21510519	G	F	OK	32.6449	42.4623	0.379324	-1.41482	1	0.158	0.999263	no	unknown protein
XLOC_015633	Prupe.5G101200	Pp05:10898043-10901989	G	F	OK	0.705217	0.456074	-0.628799	1.3854	1	0.15805	0.999263	no	NA
XLOC_009340	Prupe.3G051800	Pp03:3648382-3655994	G	F	OK	122.702	94.1342	-0.382372	1.39246	1	0.1581	0.999263	no	ATMRP6; ATPase, coupled to transmembrane movement of substances
XLOC_020812	Prupe.6G298200	Pp06:27205164-27208036	G	F	OK	1.83488	1.25362	-0.549586	1.43546	1	0.15815	0.999263	no	unknown protein
XLOC_018787	Prupe.6G250100	Pp06:24548906-24549636	G	F	OK	0.476638	0.972987	1.02953	-1.44883	1	0.15825	0.999263	no	HTB4; DNA binding
XLOC_003676	Prupe.1G139000	Pp01:10866881-10878848	G	F	OK	8.04444	6.25136	-0.363822	1.38073	1	0.1583	0.999263	no	zinc ion binding
XLOC_000501	Prupe.1G087900	Pp01:6551816-6557073	G	F	OK	18.4232	14.2137	-0.374243	1.41866	1	0.15835	0.999263	no	4CL2 (4-COUMARATE:COA LIGASE 2); 4-coumarate-CoA ligase
XLOC_011156	Prupe.3G083100	Pp03:6152196-6155980	G	F	OK	30.1488	38.9138	0.368183	-1.3768	1	0.1584	0.999263	no	signal peptidase, putative
XLOC_012808	Prupe.4G114900	Pp04:6171903-6184888	G	F	OK	14.7516	11.5308	-0.355375	1.36884	1	0.1584	0.999263	no	CHR4 (CHROMATIN REMODELING 4); ATP binding / DNA binding / chromatin binding / helicase/ nucleic acid binding / protein binding / zinc ion binding
XLOC_014677	Prupe.4G202500	Pp04:12601014-12601678	G	F	OK	31.6498	41.5782	0.393631	-1.41114	1	0.1584	0.999263	no	unknown protein
XLOC_014108	Prupe.4G073300	Pp04:3585853-3587064	G	F	OK	5.73553	4.05291	-0.500971	1.38592	1	0.15855	0.999263	no	AWPM-19-like membrane family protein
XLOC_017675	Prupe.6G032100	Pp06:2466889-2474737	G	F	OK	47.6956	37.0455	-0.364557	1.4078	1	0.15865	0.999263	no	VCS (VARICOSE); nucleotide binding / protein homodimerization
XLOC_012114	Prupe.3G290700	Pp03:26080046-26080918	G	F	OK	0.0576369	0.383777	2.73521	-1.90376	1	0.159	0.999263	no	glycine-rich protein / oleosin
XLOC_023298	Prupe.7G158700	Pp07:16616057-16619445	G	F	OK	31.1241	24.2562	-0.359678	1.38973	1	0.159	0.999263	no	CYP722A1; electron carrier/ heme binding / iron ion binding / monooxygenase/ oxygen binding
XLOC_018557	Prupe.6G204500	Pp06:21249880-21259760	G	F	OK	3.50717	2.65709	-0.40046	1.39528	1	0.1591	0.999263	no	binding
XLOC_010675	Prupe.3G303300	Pp03:26678272-26684477	G	F	OK	14.5483	11.4056	-0.351102	1.36713	1	0.15925	0.999263	no	FUNCTIONS IN: molecular_function unknown; INVOLVED IN: biological_process unknown; LOCATED IN: plasma membrane; EXPRESSED IN: 21 plant structures; EXPRESSED DURING: 13 growth stages; BEST Arabidopsis thaliana protein match is: nucleolar protein gar2-related (TAIR:AT2G42320.2); Has 1293 Blast hits to 384 proteins in 97 species: Archae - 2; Bacteria - 96; Metazoa - 212; Fungi - 99; Plants - 59; Vir…
XLOC_006902	Prupe.2G204400	Pp02:23967623-23969962	G	F	OK	0.265664	0.571172	1.10432	-1.21288	1	0.15935	0.999263	no	NA
XLOC_016042	Prupe.5G181300	Pp05:15179380-15182707	G	F	OK	4.28822	3.19422	-0.424915	1.39646	1	0.1595	0.999263	no	binding
XLOC_022110	Prupe.7G176600	Pp07:17511232-17517183	G	F	OK	10.2744	13.8157	0.427258	-1.37765	1	0.1596	0.999263	no	unknown protein
XLOC_012510	Prupe.4G057300	Pp04:2741010-2742856	G	F	OK	14.1088	18.4082	0.383758	-1.40067	1	0.15965	0.999263	no	atnudt11 (Arabidopsis thaliana Nudix hydrolase homolog 11); hydrolase
XLOC_017670	Prupe.6G031300	Pp06:2428533-2431036	G	F	OK	18.0209	13.8866	-0.375972	1.41042	1	0.15985	0.999263	no	BTB/POZ domain-containing protein
XLOC_018744	Prupe.6G240500	Pp06:23931103-23932170	G	F	OK	41.0316	52.462	0.354537	-1.34632	1	0.15995	0.999263	no	unknown protein
XLOC_025730	Prupe.8G107500	Pp08:13834251-13834836	G	F	OK	7.9721	11.3247	0.506439	-1.41668	1	0.15995	0.999263	no	unknown protein
XLOC_017844	Prupe.6G065000	Pp06:4501909-4504256	G	F	OK	14.2586	18.6972	0.390984	-1.40116	1	0.16	0.999263	no	unknown protein
XLOC_014264	Prupe.4G103400	Pp04:5283760-5287794	G	F	OK	2.51342	1.66466	-0.594423	1.41279	1	0.16005	0.999263	no	VPS2.2
XLOC_021165	Prupe.7G001300	Pp07:195083-200457	G	F	OK	60.2509	46.814	-0.364041	1.36107	1	0.1601	0.999263	no	hydroxyproline-rich glycoprotein family protein
XLOC_001216	Prupe.1G237600	Pp01:25205181-25207387	G	F	OK	205.491	264.257	0.362871	-1.39481	1	0.16015	0.999263	no	unknown protein
XLOC_006404	Prupe.2G111300	Pp02:16926229-16929679	G	F	OK	0.351809	0.625748	0.830788	-1.38185	1	0.16025	0.999263	no	RPT6A (REGULATORY PARTICLE TRIPLE-A ATPASE 6A); ATPase
XLOC_016413	Prupe.5G013900	Pp05:1502566-1508576	G	F	OK	0.514934	0.783335	0.605242	-1.40137	1	0.16025	0.999263	no	alcohol oxidase-related
XLOC_003154	Prupe.1G020000	Pp01:1408084-1410731	G	F	OK	3.01906	2.19312	-0.461115	1.39621	1	0.1603	0.999263	no	IQD19 (IQ-domain 19); calmodulin binding
XLOC_017403	Prupe.5G222200	Pp05:17274005-17275566	G	F	OK	0.716914	0.37405	-0.93857	1.43119	1	0.16035	0.999263	no	BEE3 (BR ENHANCED EXPRESSION 3); DNA binding / transcription factor
XLOC_010203	Prupe.3G215000	Pp03:21814838-21816701	G	F	OK	0.577884	0.336171	-0.781583	1.41674	1	0.16045	0.999263	no	MAPKKK15; ATP binding / kinase/ protein kinase/ protein serine/threonine kinase
XLOC_013530	Prupe.4G244900	Pp04:16243785-16246228	G	F	OK	0.883187	0.457259	-0.949708	1.42292	1	0.16045	0.999263	no	RHL1 (ROOT HAIRLESS 1); DNA binding / protein binding
XLOC_010313	Prupe.3G235100	Pp03:23046833-23048058	G	F	OK	66.0653	84.8159	0.360441	-1.40833	1	0.16055	0.999263	no	photosystem II family protein
XLOC_014077	Prupe.4G066000	Pp04:3158659-3159503	G	F	OK	4.15215	5.93999	0.516603	-1.41018	1	0.1606	0.999263	no	NA
XLOC_014163	Prupe.4G085900	Pp04:4217232-4224131	G	F	OK	71.0726	55.3361	-0.361074	1.37987	1	0.1606	0.999263	no	ARF6 (AUXIN RESPONSE FACTOR 6); transcription factor
XLOC_004169	Prupe.1G233200	Pp01:24780738-24787477	G	F	OK	14.1595	11.0586	-0.356603	1.37517	1	0.16065	0.999263	no	unknown protein
XLOC_005174	Prupe.1G454800	Pp01:38199134-38201298	G	F	OK	4.97888	6.81616	0.453138	-1.39353	1	0.16075	0.999263	no	tRNA (guanine-N7-)-methyltransferase
XLOC_002763	Prupe.1G532300	Pp01:43526493-43530941	G	F	OK	37.8738	48.1937	0.347645	-1.34635	1	0.1608	0.999263	no	unknown protein
XLOC_020982	Prupe.6G329100	Pp06:28785292-28788113	G	F	OK	5.13674	3.86777	-0.409352	1.37867	1	0.1608	0.999263	no	heavy-metal-associated domain-containing protein
XLOC_024910	Prupe.8G210300	Pp08:19493852-19495089	G	F	OK	0.509366	0.907989	0.833973	-1.45224	1	0.16095	0.999263	no	ATGSTU7 (ARABIDOPSIS THALIANA GLUTATHIONE S-TRANSFERASE TAU 7); glutathione transferase
XLOC_006788	Prupe.2G180400	Pp02:22376706-22378283	G	F	OK	2.00883	2.8893	0.524364	-1.41815	1	0.16105	0.999263	no	NA
XLOC_019040	Prupe.6G300900	Pp06:27305815-27309379	G	F	OK	2.27378	1.66097	-0.453071	1.39549	1	0.16115	0.999263	no	SCR (SCARECROW); protein binding / protein homodimerization/ sequence-specific DNA binding / transcription factor
XLOC_005740	Prupe.1G575000	Pp01:46834960-46843621	G	F	OK	12.542	9.80968	-0.354491	1.3646	1	0.16125	0.999263	no	FUNCTIONS IN: molecular_function unknown; INVOLVED IN: biological_process unknown; LOCATED IN: cellular_component unknown; EXPRESSED IN: 23 plant structures; EXPRESSED DURING: 13 growth stages; CONTAINS InterPro DOMAIN/s: Vps51/Vps67 (InterPro:IPR014812); Has 204 Blast hits to 183 proteins in 76 species: Archae - 0; Bacteria - 0; Metazoa - 127; Fungi - 34; Plants - 24; Viruses - 0; Other Eukaryot…
XLOC_014614	Prupe.4G183100	Pp04:10831399-10832723	G	F	OK	0.0935046	0.271066	1.53554	-1.57448	1	0.16125	0.999263	no	dynein light chain, putative
XLOC_016999	Prupe.5G142200	Pp05:13183194-13192163	G	F	OK	39.5506	31.0227	-0.350376	1.3558	1	0.16125	0.999263	no	AML1 (ARABIDOPSIS MEI2-LIKE PROTEIN 1); RNA binding / protein binding
XLOC_004640	Prupe.1G335700,Prupe.1G335800	Pp01:31689680-31695090	G	F	OK	0.571641	0.329185	-0.796209	1.36939	1	0.1613	0.999263	no	NA
XLOC_017885	Prupe.6G075100	Pp06:5154970-5158223	G	F	OK	20.4397	26.2408	0.360434	-1.35079	1	0.16135	0.999263	no	ATEXPA4 (ARABIDOPSIS THALIANA EXPANSIN A4)
XLOC_021921	Prupe.7G144700	Pp07:15829504-15851521	G	F	OK	6.29617	4.91984	-0.355864	1.38316	1	0.16135	0.999263	no	NA
XLOC_005926	Prupe.2G023600	Pp02:2300806-2309340	G	F	OK	11.9915	9.38103	-0.354194	1.3807	1	0.16145	0.999263	no	disease resistance protein (NBS-LRR class), putative
XLOC_001153	Prupe.1G224100	Pp01:23785103-23786453	G	F	OK	9.61137	12.8271	0.416377	-1.39412	1	0.16155	0.999263	no	unknown protein
XLOC_007459	Prupe.2G310300	Pp02:29368820-29373136	G	F	OK	10.832	14.2261	0.393243	-1.37837	1	0.1616	0.999263	no	SOS3 (SALT OVERLY SENSITIVE 3); calcium ion binding / calcium-dependent protein serine/threonine phosphatase
XLOC_014042	Prupe.4G056100	Pp04:2687637-2690764	G	F	OK	0.89607	1.29972	0.53652	-1.41219	1	0.16165	0.999263	no	peroxidase, putative
XLOC_022187	Prupe.7G192600	Pp07:18371149-18371953	G	F	OK	2.95401	1.92125	-0.620631	1.38176	1	0.16165	0.999263	no	auxin-responsive protein-related
XLOC_012265	Prupe.4G010900	Pp04:534716-536292	G	F	OK	1.01754	1.55566	0.61244	-1.38627	1	0.16195	0.999263	no	unknown protein
XLOC_007775	Prupe.2G042800	Pp02:4710440-4718631	G	F	OK	23.012	18.02	-0.352787	1.36686	1	0.16205	0.999263	no	RBR1 (RETINOBLASTOMA-RELATED 1); transcription factor binding
XLOC_003417	Prupe.1G085500	Pp01:6366022-6368888	G	F	OK	32.6597	42.3764	0.375748	-1.38898	1	0.16215	0.999263	no	RUXF (SMALL NUCLEAR RIBONUCLEOPROTEIN F)
XLOC_022441	Prupe.7G243100	Pp07:20831135-20833523	G	F	OK	189.9	242.458	0.352501	-1.37763	1	0.16215	0.999263	no	bundle-sheath defective protein 2 family / bsd2 family
XLOC_007701	Prupe.2G027900	Pp02:2894673-2896536	G	F	OK	0.439192	0.245664	-0.838166	1.35896	1	0.1622	0.999263	no	transducin family protein / WD-40 repeat family protein
XLOC_007699	Prupe.2G027100	Pp02:2779284-2784667	G	F	OK	48.8019	63.8634	0.388051	-1.38945	1	0.16225	0.999263	no	HCF153
XLOC_012785	Prupe.4G110300	Pp04:5863931-5866567	G	F	OK	7.43848	10.1634	0.450304	-1.37691	1	0.16235	0.999263	no	FUNCTIONS IN: molecular_function unknown; INVOLVED IN: biological_process unknown; EXPRESSED IN: sperm cell, pollen tube; CONTAINS InterPro DOMAIN/s: Ribonuclease H2, subunit C (InterPro:IPR013924); Has 147 Blast hits to 147 proteins in 73 species: Archae - 0; Bacteria - 0; Metazoa - 78; Fungi - 43; Plants - 16; Viruses - 0; Other Eukaryotes - 10 (source: NCBI BLink).
XLOC_007767	Prupe.2G041200	Pp02:4528126-4529124	G	F	OK	6.22442	8.53846	0.456036	-1.40683	1	0.1624	0.999263	no	NA
XLOC_018064	Prupe.6G110300	Pp06:7915816-7918028	G	F	OK	0.892912	0.540876	-0.723219	1.3925	1	0.1625	0.999263	no	xyloglucan:xyloglucosyl transferase, putative / xyloglucan endotransglycosylase, putative / endo-xyloglucan transferase, putative
XLOC_024942	Prupe.8G216600	Pp08:19832426-19833571	G	F	OK	5.26788	7.16554	0.443853	-1.36968	1	0.16255	0.999263	no	NA
XLOC_004564	Prupe.1G317300	Pp01:30554141-30556907	G	F	OK	55.2948	43.3306	-0.351759	1.37528	1	0.1626	0.999263	no	octicosapeptide/Phox/Bem1p (PB1) domain-containing protein
XLOC_019418	Prupe.6G013400	Pp06:937301-942302	G	F	OK	1.84572	1.08495	-0.766553	1.38165	1	0.1627	0.999263	no	peroxidase, putative
XLOC_018750	Prupe.6G241500	Pp06:24000587-24005943	G	F	OK	0.740298	0.483866	-0.613499	1.37991	1	0.1627	0.999263	no	MCM8; ATP binding / DNA binding / DNA-dependent ATPase/ nucleoside-triphosphatase/ nucleotide binding
XLOC_005440	Prupe.1G510100	Pp01:42021167-42023731	G	F	OK	25.2573	32.6776	0.371603	-1.3931	1	0.1628	0.999263	no	MUB6 (MEMBRANE-ANCHORED UBIQUITIN-FOLD PROTEIN 6 PRECURSOR)
XLOC_003135	Prupe.1G016500	Pp01:1176915-1177437	G	F	OK	0.304802	0.866769	1.50777	-1.54602	1	0.1629	0.999263	no	NA
XLOC_008721	Prupe.2G252000	Pp02:26605835-26619956	G	F	OK	2.53555	1.92232	-0.399449	1.38294	1	0.1629	0.999263	no	EMB2771 (EMBRYO DEFECTIVE 2771); ubiquitin-protein ligase
XLOC_012477	Prupe.4G050400	Pp04:2410898-2412783	G	F	OK	82.0445	64.2094	-0.353622	1.37227	1	0.16295	0.999263	no	SPL3 (SQUAMOSA PROMOTER BINDING PROTEIN-LIKE 3); DNA binding / transcription factor
XLOC_005244	Prupe.1G469600	Pp01:39126380-39127570	G	F	OK	13.6569	10.336	-0.401952	1.37899	1	0.163	0.999263	no	NA
XLOC_010107	Prupe.3G199100	Pp03:20849025-20849740	G	F	OK	0.11325	0.417207	1.88125	-1.59447	1	0.16305	0.999263	no	NA
XLOC_013622	Prupe.4G262700	Pp04:19144533-19145269	G	F	OK	0.137714	0.505439	1.87586	-1.5899	1	0.16305	0.999263	no	NA
XLOC_011221	Prupe.3G098500	Pp03:7563874-7587435	G	F	OK	12.5064	9.7962	-0.352375	1.34795	1	0.1634	0.999263	no	ATMRP11; ATPase, coupled to transmembrane movement of substances
XLOC_020491	Prupe.6G232400	Pp06:23492293-23494113	G	F	OK	38.1387	48.8968	0.358485	-1.3667	1	0.1635	0.999263	no	thylakoid lumen 15.0 kDa protein
XLOC_023204	Prupe.7G137500	Pp07:15420538-15422527	G	F	OK	8.46356	11.2342	0.40856	-1.38399	1	0.1635	0.999263	no	peroxidase, putative
XLOC_009993	Prupe.3G175900,Prupe.3G176000	Pp03:19312880-19320705	G	F	OK	0.281709	0.128552	-1.13186	1.31876	1	0.1636	0.999263	no	NA
XLOC_009733	Prupe.3G126100	Pp03:11607653-11611158	G	F	OK	5.68574	7.81835	0.459516	-1.37619	1	0.16365	0.999263	no	3-phosphoinositide-dependent protein kinase-1, putative
XLOC_001977	Prupe.1G381800	Pp01:34371543-34375526	G	F	OK	18.0793	14.097	-0.358947	1.38795	1	0.1637	0.999263	no	zinc finger (C2H2 type) family protein
XLOC_005644	Prupe.1G553900	Pp01:45258084-45262446	G	F	OK	11.0262	8.5792	-0.362023	1.36703	1	0.1638	0.999263	no	LOCATED IN: mitochondrion; EXPRESSED IN: 24 plant structures; EXPRESSED DURING: 14 growth stages; CONTAINS InterPro DOMAIN/s: TFIIS N-terminal (InterPro:IPR017923); BEST Arabidopsis thaliana protein match is: DNA binding / protein binding / transcription regulator (TAIR:AT3G48050.2); Has 1007 Blast hits to 471 proteins in 129 species: Archae - 0; Bacteria - 216; Metazoa - 191; Fungi - 150; Plants…
XLOC_026094	Prupe.8G183100	Pp08:18239477-18241110	G	F	OK	16.4694	21.4809	0.383262	-1.4128	1	0.16395	0.999263	no	pde191 (pigment defective 191)
XLOC_006687	Prupe.2G162300	Pp02:21304061-21306430	G	F	OK	0.157669	0.349817	1.1497	-1.28194	1	0.164	0.999263	no	short-chain dehydrogenase/reductase (SDR) family protein
XLOC_024200	Prupe.8G069400	Pp08:10196008-10201246	G	F	OK	2.38949	1.67871	-0.509348	1.36924	1	0.164	0.999263	no	RAB GDP-dissociation inhibitor
XLOC_011801	Prupe.3G222400	Pp03:22275413-22276904	G	F	OK	3.95327	2.79999	-0.497623	1.40294	1	0.16415	0.999263	no	unknown protein
XLOC_002489	Prupe.1G476800	Pp01:39852906-39854129	G	F	OK	0.433513	0.777527	0.842818	-1.42753	1	0.1642	0.999263	no	GR-RBP3 (glycine-rich RNA-binding protein 3); ATP binding / RNA binding
XLOC_026521	Prupe.8G270800	Pp08:22463413-22467844	G	F	OK	2.86137	2.12129	-0.431762	1.33157	1	0.1643	0.999263	no	BXL2 (BETA-XYLOSIDASE 2); hydrolase, hydrolyzing O-glycosyl compounds
XLOC_001720	Prupe.1G331400	Pp01:31395745-31406871	G	F	OK	24.4919	19.3247	-0.341855	1.31938	1	0.1644	0.999263	no	unknown protein
XLOC_020736	Prupe.6G282700	Pp06:26341368-26343396	G	F	OK	0.378346	0.623436	0.720536	-1.39013	1	0.16455	0.999263	no	lectin protein kinase, putative
XLOC_025733	Prupe.8G107900	Pp08:13847279-13849783	G	F	OK	12.9125	17.0385	0.400026	-1.38249	1	0.16455	0.999263	no	NA
XLOC_003691	Prupe.1G142200	Pp01:11164899-11166082	G	F	OK	0.0443309	0.247062	2.47849	-1.69372	1	0.1646	0.999263	no	NA
XLOC_011779	Prupe.3G217200	Pp03:21930053-21930437	G	F	OK	1.18721	0.347923	-1.77074	1.50938	1	0.16495	0.999263	no	NA
XLOC_008909	Prupe.2G293800	Pp02:28590820-28594053	G	F	OK	0.737754	1.3569	0.8791	-1.36748	1	0.1653	0.999263	no	vesicle transport protein-related
XLOC_013222	Prupe.4G189000	Pp04:11242309-11247472	G	F	OK	36.5803	46.4985	0.346118	-1.34736	1	0.16535	0.999263	no	NA
XLOC_020584	Prupe.6G251700	Pp06:24631334-24636969	G	F	OK	13.5904	10.5807	-0.361145	1.36853	1	0.16535	0.999263	no	ATCHX20 (CATION/H+ EXCHANGER 20); monovalent cation:proton antiporter/ sodium:hydrogen antiporter
XLOC_021551	Prupe.7G072800	Pp07:11039582-11042999	G	F	OK	2.00159	1.46674	-0.448527	1.36841	1	0.1654	0.999263	no	C2 domain-containing protein
XLOC_003119	Prupe.1G013900	Pp01:1038369-1038896	G	F	OK	97.2101	124.684	0.359103	-1.37892	1	0.1655	0.999263	no	ferredoxin family protein
XLOC_013139	Prupe.4G176000	Pp04:10420638-10423716	G	F	OK	192.723	246.782	0.356708	-1.3809	1	0.1656	0.999263	no	chloroplast 30S ribosomal protein S20, putative
XLOC_010626	Prupe.3G294900	Pp03:26281439-26285957	G	F	OK	11.7128	9.16357	-0.354105	1.36931	1	0.16565	0.999263	no	NA
XLOC_012020	Prupe.3G272500	Pp03:25260313-25267914	G	F	OK	90.0554	69.2	-0.380041	1.34506	1	0.16575	0.999263	no	AHA11 (Arabidopsis H(+)-ATPase 11); ATPase
XLOC_003232	Prupe.1G042000	Pp01:2992487-2995258	G	F	OK	3.05674	2.12687	-0.523265	1.39233	1	0.16585	0.999263	no	UBQ3 (POLYUBIQUITIN 3); protein binding
XLOC_011772	Prupe.3G216000	Pp03:21851213-21854874	G	F	OK	8.55509	6.52839	-0.390055	1.39104	1	0.1659	0.999263	no	sks5 (SKU5 Similar 5); copper ion binding / oxidoreductase
XLOC_005605	Prupe.1G544400	Pp01:44491771-44494261	G	F	OK	56.318	72.0192	0.354787	-1.36463	1	0.166	0.999263	no	CYTC-2 (cytochrome c-2); electron carrier/ heme binding / iron ion binding
XLOC_007219	Prupe.2G263800	Pp02:27158593-27160599	G	F	OK	24.9679	19.4666	-0.359074	1.38872	1	0.16605	0.999263	no	zinc finger (C3HC4-type RING finger) family protein
XLOC_006088	Prupe.2G052700	Pp02:6104210-6108202	G	F	OK	0.910919	0.558018	-0.707012	1.38571	1	0.1662	0.999263	no	UBP12 (UBIQUITIN-SPECIFIC PROTEASE 12); ubiquitin thiolesterase/ ubiquitin-specific protease
XLOC_000533	Prupe.1G096800	Pp01:7691981-7696328	G	F	OK	21.8574	16.317	-0.42174	1.38834	1	0.16625	0.999263	no	EXLB2 (EXPANSIN-LIKE B2 PRECURSOR)
XLOC_004675	Prupe.1G343200	Pp01:32194131-32198207	G	F	OK	2.38491	1.77835	-0.423397	1.37662	1	0.16625	0.999263	no	PSKR1 (PHYTOSULFOKIN RECEPTOR 1); ATP binding / peptide receptor/ protein serine/threonine kinase
XLOC_024675	Prupe.8G162800	Pp08:17016923-17018459	G	F	OK	6.89976	9.12474	0.403239	-1.37274	1	0.16625	0.999263	no	DNAJ heat shock protein, putative
XLOC_020489	Prupe.6G231900	Pp06:23449545-23452337	G	F	OK	21.8433	28.0002	0.358248	-1.35488	1	0.1663	0.999263	no	unknown protein
XLOC_023160	Prupe.7G125700	Pp07:14755940-14757987	G	F	OK	13.5972	17.8086	0.389259	-1.38889	1	0.1663	0.999263	no	ankyrin repeat family protein
XLOC_015263	Prupe.5G032200	Pp05:3690179-3693123	G	F	OK	47.7153	60.765	0.348787	-1.36041	1	0.16645	0.999263	no	INVOLVED IN: biological_process unknown; EXPRESSED IN: 23 plant structures; EXPRESSED DURING: 15 growth stages; CONTAINS InterPro DOMAIN/s: SNARE associated Golgi protein (InterPro:IPR015414); BEST Arabidopsis thaliana protein match is: unknown protein (TAIR:AT1G71940.1); Has 2258 Blast hits to 2258 proteins in 517 species: Archae - 4; Bacteria - 1129; Metazoa - 188; Fungi - 22; Plants - 104; Vir…
XLOC_026188	Prupe.8G202400	Pp08:19075305-19083907	G	F	OK	3.23082	2.02109	-0.676766	1.38061	1	0.1665	0.999263	no	leucine-rich repeat family protein / protein kinase family protein
XLOC_004754	Prupe.1G361900	Pp01:33302433-33305804	G	F	OK	0.559096	0.330824	-0.757031	1.30978	1	0.1666	0.999263	no	family II extracellular lipase 3 (EXL3)
XLOC_011608	Prupe.3G179400	Pp03:19549065-19551032	G	F	OK	852.455	1134.95	0.412936	-1.38397	1	0.1666	0.999263	no	PSBP-1 (PHOTOSYSTEM II SUBUNIT P-1); poly(U) binding
XLOC_006037	Prupe.2G045100	Pp02:5041798-5042068	G	F	OK	2.63571	0.545986	-2.27125	1.71084	1	0.16675	0.999263	no	NADH-ubiquinone oxidoreductase-related
XLOC_018058	Prupe.6G108700	Pp06:7753188-7754908	G	F	OK	12.2909	16.3288	0.409822	-1.35529	1	0.1669	0.999263	no	50S ribosomal protein-related
XLOC_021093	Prupe.6G351200	Pp06:29930268-29932065	G	F	OK	47.5623	61.2081	0.363906	-1.38129	1	0.1669	0.999263	no	emb2171 (embryo defective 2171); structural constituent of ribosome
XLOC_009014	Prupe.2G314900	Pp02:29601363-29603497	G	F	OK	24.9995	32.3738	0.372927	-1.3471	1	0.167	0.999263	no	FUNCTIONS IN: molecular_function unknown; INVOLVED IN: biological_process unknown; LOCATED IN: cellular_component unknown; CONTAINS InterPro DOMAIN/s: Yippee-like protein (InterPro:IPR004910); BEST Arabidopsis thaliana protein match is: yippee family protein (TAIR:AT5G53940.1); Has 697 Blast hits to 697 proteins in 149 species: Archae - 0; Bacteria - 0; Metazoa - 401; Fungi - 132; Plants - 110; V…
XLOC_015825	Prupe.5G138000	Pp05:12991455-12996423	G	F	OK	0.122715	0.258067	1.07243	-1.34931	1	0.16705	0.999263	no	NIP5;1; arsenite transmembrane transporter/ boron transporter/ water channel
XLOC_005826	Prupe.2G002700	Pp02:326619-327493	G	F	OK	1.00561	0.542072	-0.89152	1.42099	1	0.16715	0.999263	no	NA
XLOC_024134	Prupe.8G057100	Pp08:6883750-6888271	G	F	OK	65.4697	83.7982	0.356091	-1.36068	1	0.16715	0.999263	no	FUNCTIONS IN: molecular_function unknown; INVOLVED IN: biological_process unknown; LOCATED IN: chloroplast; EXPRESSED IN: 24 plant structures; EXPRESSED DURING: 15 growth stages; CONTAINS InterPro DOMAIN/s: Mitochodrial transcription termination factor-related (InterPro:IPR003690); Has 120 Blast hits to 97 proteins in 13 species: Archae - 0; Bacteria - 0; Metazoa - 0; Fungi - 0; Plants - 103; Vir…
XLOC_013536	Prupe.4G246000	Pp04:16344471-16346407	G	F	OK	34.784	45.5153	0.387931	-1.36355	1	0.1673	0.999263	no	NA
XLOC_018263	Prupe.6G146500	Pp06:12132475-12138336	G	F	OK	38.3488	49.3124	0.362768	-1.38034	1	0.1673	0.999263	no	NA
XLOC_017977	Prupe.6G092400	Pp06:6370605-6372940	G	F	OK	25.1426	32.3857	0.365219	-1.37099	1	0.16745	0.999263	no	Ulp1 protease family protein
XLOC_019353	Prupe.6G364500	Pp06:30594694-30599209	G	F	OK	9.3255	7.2802	-0.357203	1.34719	1	0.16745	0.999263	no	calcineurin-like phosphoesterase family protein
XLOC_023258	Prupe.7G148000	Pp07:16052467-16054089	G	F	OK	2.6921	1.89002	-0.510335	1.39249	1	0.16745	0.999263	no	GATL2 (Galacturonosyltransferase-like 2); polygalacturonate 4-alpha-galacturonosyltransferase/ transferase, transferring glycosyl groups / transferase, transferring hexosyl groups
XLOC_022402	Prupe.7G235300	Pp07:20455607-20463171	G	F	OK	17.4782	13.6914	-0.352289	1.374	1	0.16745	0.999263	no	PDR4 (PLEIOTROPIC DRUG RESISTANCE 4); ATPase, coupled to transmembrane movement of substances
XLOC_025384	Prupe.8G034300	Pp08:3177023-3177407	G	F	OK	0.215857	1.27572	2.56316	-1.77853	1	0.16755	0.999263	no	unknown protein
XLOC_019786	Prupe.6G082700	Pp06:5570550-5574471	G	F	OK	308.63	392.482	0.346748	-1.34776	1	0.1679	0.999263	no	HTB1; DNA binding
XLOC_006557	Prupe.2G139800	Pp02:19670841-19671551	G	F	OK	2.21133	3.41247	0.6259	-1.38635	1	0.168	0.999263	no	NA
XLOC_017281	Prupe.5G198900	Pp05:16020147-16029871	G	F	OK	16.4889	12.9903	-0.344057	1.34287	1	0.168	0.999263	no	formin homology 2 domain-containing protein / FH2 domain-containing protein
XLOC_001201	Prupe.1G234100	Pp01:24826801-24828279	G	F	OK	0.42536	0.0938134	-2.18082	1.64272	1	0.16805	0.999263	no	senescence-associated protein, putative
XLOC_007787	Prupe.2G045300	Pp02:5077130-5078165	G	F	OK	5.50622	3.9386	-0.483381	1.37103	1	0.1682	0.999263	no	hydrolase
XLOC_010373	Prupe.3G246500	Pp03:23765506-23778194	G	F	OK	18.5245	14.5331	-0.350087	1.37013	1	0.1682	0.999263	no	binding
XLOC_024263	Prupe.8G079600	Pp08:11320008-11320901	G	F	OK	7.26294	5.24121	-0.470654	1.366	1	0.16835	0.999263	no	auxin-responsive protein, putative
XLOC_024503	Prupe.8G128100	Pp08:15185605-15187399	G	F	OK	109.019	85.3783	-0.352643	1.34711	1	0.16835	0.999263	no	caffeoyl-CoA 3-O-methyltransferase, putative
XLOC_017043	Prupe.5G151000	Pp05:13679921-13681699	G	F	OK	5.11589	6.85098	0.421327	-1.37833	1	0.16845	0.999263	no	zinc finger (MYND type) family protein / F-box family protein
XLOC_016602	Prupe.5G053600	Pp05:5735109-5741456	G	F	OK	0.921755	0.652513	-0.498376	1.35847	1	0.1685	0.999263	no	NA
XLOC_017395	Prupe.5G220600	Pp05:17179324-17182017	G	F	OK	5.05672	6.61607	0.387772	-1.36813	1	0.1686	0.999263	no	NA
XLOC_021412	Prupe.7G046000	Pp07:8198774-8201075	G	F	OK	0.849881	0.552684	-0.620806	1.37347	1	0.16865	0.999263	no	unknown protein
XLOC_002863	Prupe.1G549600	Pp01:44924521-44931398	G	F	OK	0.0717488	0.208007	1.5356	-1.18561	1	0.1687	0.999263	no	STK (SEEDSTICK); protein binding / transcription factor
XLOC_025846	Prupe.8G134400	Pp08:15532992-15535669	G	F	OK	0.700018	1.08385	0.630702	-1.35196	1	0.16875	0.999263	no	hydrolase
XLOC_023700	Prupe.7G243400	Pp07:20838560-20840318	G	F	OK	4.95953	3.64634	-0.443753	1.34455	1	0.1688	0.999263	no	electron carrier/ heme binding / peroxidase
XLOC_011134	Prupe.3G077100	Pp03:5666626-5684584	G	F	OK	3.11956	2.42479	-0.363483	1.34417	1	0.16895	0.999263	no	binding
XLOC_000801	Prupe.1G146700	Pp01:11544709-11548454	G	F	OK	3.29036	5.1371	0.642708	-1.36159	1	0.1693	0.999263	no	unknown protein
XLOC_017629	Prupe.6G023500	Pp06:1889039-1889234	G	F	OK	26.6821	14.2299	-0.906945	1.39163	1	0.1694	0.999263	no	NA
XLOC_015462	Prupe.5G069300	Pp05:8339251-8339883	G	F	OK	19.8192	26.2553	0.40571	-1.36604	1	0.16945	0.999263	no	NA
XLOC_010861	Prupe.3G020900	Pp03:1520879-1526394	G	F	OK	16.3049	12.7564	-0.354076	1.33661	1	0.1696	0.999263	no	merozoite surface protein-related
XLOC_025692	Prupe.8G098500	Pp08:13014896-13020530	G	F	OK	15.2431	11.9329	-0.353207	1.37109	1	0.16975	0.999263	no	CHB3; DNA binding / transcription factor/ zinc ion binding
XLOC_000579	Prupe.1G106300	Pp01:8526761-8531127	G	F	OK	10.1196	7.81957	-0.371993	1.35912	1	0.1699	0.999263	no	protein kinase family protein
XLOC_002528	Prupe.1G485300	Pp01:40420869-40423421	G	F	OK	78.2358	99.2009	0.342524	-1.34323	1	0.1699	0.999263	no	RPS11-BETA (RIBOSOMAL PROTEIN S11-BETA); structural constituent of ribosome
XLOC_017563	Prupe.6G007200	Pp06:613703-615825	G	F	OK	1.77308	2.51763	0.505812	-1.37719	1	0.1699	0.999263	no	CYP93D1; electron carrier/ heme binding / iron ion binding / monooxygenase/ oxygen binding
XLOC_000972	Prupe.1G182600	Pp01:16043308-16052482	G	F	OK	56.6336	44.5353	-0.346709	1.34262	1	0.17015	0.999263	no	epsin N-terminal homology (ENTH) domain-containing protein
XLOC_005571	Prupe.1G536100	Pp01:43807843-43821574	G	F	OK	15.0693	11.7553	-0.358296	1.3386	1	0.17015	0.999263	no	PWD (PHOSPHOGLUCAN, WATER DIKINASE); ATP binding / kinase
XLOC_023653	Prupe.7G233400	Pp07:20359159-20361709	G	F	OK	0.466558	0.766787	0.716768	-1.36203	1	0.1702	0.999263	no	ABIL1 (Abi-1-like 1)
XLOC_010680	Prupe.3G304200,Prupe.3G304300	Pp03:26716045-26722933	G	F	OK	96.4394	65.0801	-0.567406	1.35417	1	0.1706	0.999263	no	NA
XLOC_012432	Prupe.4G042700	Pp04:2015165-2019155	G	F	OK	4.52451	3.44286	-0.394155	1.34637	1	0.1706	0.999263	no	mannitol transporter, putative
XLOC_008933	Prupe.2G298900	Pp02:28818741-28822326	G	F	OK	1.6024	1.10126	-0.541079	1.39064	1	0.17065	0.999263	no	MATE efflux family protein
XLOC_017145	Prupe.5G172600	Pp05:14698111-14704598	G	F	OK	33.0159	25.9862	-0.345416	1.35194	1	0.17065	0.999263	no	anion exchange family protein
XLOC_010721	Prupe.3G311000	Pp03:26993180-26998283	G	F	OK	17.424	13.7831	-0.33817	1.32504	1	0.1707	0.999263	no	unknown protein
XLOC_005485	Prupe.1G519600	Pp01:42663515-42665476	G	F	OK	4.29213	3.1705	-0.436987	1.35765	1	0.1708	0.999263	no	AtUGT85A2 (UDP-glucosyl transferase 85A2); UDP-glycosyltransferase/ glucuronosyltransferase/ transferase, transferring glycosyl groups
XLOC_015700	Prupe.5G114700	Pp05:11762237-11765896	G	F	OK	10.0437	7.81439	-0.362092	1.34355	1	0.17085	0.999263	no	protein kinase family protein
XLOC_002032	Prupe.1G392300	Pp01:34929879-34933224	G	F	OK	5.15236	3.85918	-0.41694	1.33235	1	0.17095	0.999263	no	armadillo/beta-catenin repeat family protein
XLOC_010994	Prupe.3G048900	Pp03:3458394-3462004	G	F	OK	26.6251	37.4169	0.490907	-1.32534	1	0.17105	0.999263	no	NA
XLOC_022683	Prupe.7G021500	Pp07:3270764-3280285	G	F	OK	3.8752	5.09516	0.394857	-1.35	1	0.17105	0.999263	no	ASD1 (ALPHA-L-ARABINOFURANOSIDASE 1); alpha-N-arabinofuranosidase/ hydrolase, acting on glycosyl bonds / xylan 1,4-beta-xylosidase
XLOC_006449	Prupe.2G121100	Pp02:17841527-17845026	G	F	OK	0.298341	0.507182	0.765542	-1.29642	1	0.17115	0.999263	no	peptidyl-prolyl cis-trans isomerase
XLOC_005069	Prupe.1G433500	Pp01:37080106-37081927	G	F	OK	0.763103	0.469275	-0.701445	1.3615	1	0.1712	0.999263	no	AT-HSFB4; DNA binding / transcription factor
XLOC_007697	Prupe.2G026700	Pp02:2753796-2759413	G	F	OK	0.329671	0.211095	-0.643135	1.34465	1	0.1714	0.999263	no	CKX6 (CYTOKININ OXIDASE/DEHYDROGENASE 6); cytokinin dehydrogenase
XLOC_002030	Prupe.1G392100	Pp01:34919961-34922218	G	F	OK	26.8481	34.7488	0.372146	-1.37182	1	0.17145	0.999263	no	microsomal signal peptidase 25 kDa subunit, putative (SPC25)
XLOC_026441	Prupe.8G254700	Pp08:21759739-21761601	G	F	OK	3.9641	5.48447	0.46836	-1.36184	1	0.17145	0.999263	no	unknown protein
XLOC_005041	Prupe.1G425300	Pp01:36612464-36614933	G	F	OK	0.377964	0.216613	-0.803132	1.38385	1	0.17155	0.999263	no	NA
XLOC_026089	Prupe.8G181400	Pp08:18156856-18158589	G	F	OK	0.327789	0.0409094	-3.00227	0.991476	1	0.17155	0.999263	no	unknown protein
XLOC_003280	Prupe.1G053600	Pp01:3723716-3731594	G	F	OK	42.592	33.4497	-0.34859	1.34895	1	0.17165	0.999263	no	transducin family protein / WD-40 repeat family protein
XLOC_021411	Prupe.7G045900	Pp07:8188994-8191079	G	F	OK	0.515924	0.309904	-0.735334	1.31942	1	0.1717	0.999263	no	unknown protein
XLOC_011070	Prupe.3G065400	Pp03:4720106-4725474	G	F	OK	1.66951	1.18055	-0.499969	1.37425	1	0.17185	0.999263	no	EMB2083 (embryo defective 2083); ATP binding / ATP-dependent peptidase/ ATPase/ metalloendopeptidase/ metallopeptidase/ nucleoside-triphosphatase/ nucleotide binding / serine-type endopeptidase
XLOC_006045	Prupe.2G046400	Pp02:5370807-5377086	G	F	OK	1.21175	0.892428	-0.441283	1.32593	1	0.17205	0.999263	no	disease resistance protein (NBS-LRR class), putative
XLOC_018414	Prupe.6G179300	Pp06:18468262-18469364	G	F	OK	3.26721	2.22269	-0.555749	1.38646	1	0.17205	0.999263	no	heavy-metal-associated domain-containing protein / copper chaperone (CCH)-related
XLOC_012466	Prupe.4G048500	Pp04:2320303-2322686	G	F	OK	0.27146	0.140235	-0.952892	1.30991	1	0.1723	0.999263	no	basic helix-loop-helix (bHLH) family protein
XLOC_001140	Prupe.1G221600	Pp01:23596374-23607882	G	F	OK	25.1002	19.4393	-0.368718	1.33596	1	0.17245	0.999263	no	GYF domain-containing protein
XLOC_007274	Prupe.2G275100	Pp02:27720989-27726776	G	F	OK	21.6176	17.0404	-0.34325	1.34552	1	0.17245	0.999263	no	splicing factor-related
XLOC_006918	Prupe.2G207600	Pp02:24134000-24135971	G	F	OK	2.16997	1.50075	-0.531992	1.40031	1	0.1725	0.999263	no	CHY1 (BETA-HYDROXYISOBUTYRYL-COA HYDROLASE 1); 3-hydroxyisobutyryl-CoA hydrolase
XLOC_015780	Prupe.5G129800	Pp05:12550055-12553428	G	F	OK	205.386	159.174	-0.367734	1.3556	1	0.1725	0.999263	no	ATMGL (ARABIDOPSIS THALIANA METHIONINE GAMMA-LYASE); catalytic/ methionine gamma-lyase
XLOC_017503	Prupe.5G242600	Pp05:18235858-18238619	G	F	OK	5.0194	3.8122	-0.396891	1.35372	1	0.1725	0.999263	no	unknown protein
XLOC_012288	Prupe.4G014900	Pp04:684055-689780	G	F	OK	0.0568656	0.34715	2.60993	-1.19122	1	0.1726	0.999263	no	NA
XLOC_000694	Prupe.1G126700	Pp01:9964167-9966905	G	F	OK	64.5583	82.2298	0.34906	-1.36305	1	0.17265	0.999263	no	NA
XLOC_004835	Prupe.1G377800	Pp01:34172431-34176364	G	F	OK	2.84935	2.07831	-0.455218	1.35136	1	0.1727	0.999263	no	oxidoreductase, acting on NADH or NADPH
XLOC_023219	Prupe.7G139200	Pp07:15533979-15537683	G	F	OK	2.1211	1.54996	-0.45258	1.34905	1	0.1727	0.999263	no	NA
XLOC_001829	Prupe.1G352700	Pp01:32792319-32797697	G	F	OK	9.05325	7.07983	-0.354722	1.33733	1	0.1728	0.999263	no	nucleoside phosphatase family protein / GDA1/CD39 family protein
XLOC_014285	Prupe.4G108100	Pp04:5645210-5649359	G	F	OK	6.46025	4.95732	-0.382029	1.36555	1	0.1728	0.999263	no	AGO2 (argonaute 2); nucleic acid binding
XLOC_025825	Prupe.8G129200	Pp08:15258782-15266500	G	F	OK	6.34211	3.99575	-0.666497	1.3328	1	0.1728	0.999263	no	LOCATED IN: plasma membrane; EXPRESSED IN: 22 plant structures; EXPRESSED DURING: 13 growth stages; CONTAINS InterPro DOMAIN/s: Protein of unknown function DUF869, plant (InterPro:IPR008587); BEST Arabidopsis thaliana protein match is: transport protein-related (TAIR:AT2G23360.1); Has 35914 Blast hits to 20425 proteins in 933 species: Archae - 357; Bacteria - 2527; Metazoa - 19254; Fungi - 2459; …
XLOC_018096	Prupe.6G115300	Pp06:8355866-8366493	G	F	OK	10.6733	14.2265	0.414572	-1.33104	1	0.17285	0.999263	no	NA
XLOC_004154	Prupe.1G229200	Pp01:24219219-24223603	G	F	OK	7.97801	6.17857	-0.368757	1.35312	1	0.1729	0.999263	no	leucine-rich repeat family protein
XLOC_021593	Prupe.7G081000	Pp07:11625266-11633254	G	F	OK	36.4814	28.6115	-0.350566	1.32876	1	0.17315	0.999263	no	unknown protein
XLOC_010461	Prupe.3G261900	Pp03:24755379-24756974	G	F	OK	0.125221	0.334101	1.4158	-1.44206	1	0.17325	0.999263	no	ATMINE1 (Arabidopsis homologue of bacterial MinE 1); protein binding
XLOC_016962	Prupe.5G134700	Pp05:12823115-12824906	G	F	OK	0.0844976	0.226303	1.42127	-1.44763	1	0.17325	0.999263	no	oxidoreductase, 2OG-Fe(II) oxygenase family protein
XLOC_007708	Prupe.2G028900	Pp02:3008434-3008983	G	F	OK	6.17519	4.12245	-0.582981	1.37969	1	0.17335	0.999263	no	disease resistance-responsive protein-related / dirigent protein-related
XLOC_017492	Prupe.5G240000	Pp05:18100143-18102311	G	F	OK	0.475394	0.265795	-0.838809	1.37979	1	0.1734	0.999263	no	MYB52 (MYB DOMAIN PROTEIN 52); DNA binding / transcription factor
XLOC_012441	Prupe.4G043900	Pp04:2099065-2109650	G	F	OK	16.9805	13.3944	-0.342246	1.33038	1	0.17345	0.999263	no	SFR6 (SENSITIVE TO FREEZING 6)
XLOC_002204	Prupe.1G422700	Pp01:36479445-36485030	G	F	OK	8.79883	11.9332	0.4396	-1.34154	1	0.1736	0.999263	no	NA
XLOC_004355	Prupe.1G274500	Pp01:28046953-28049619	G	F	OK	42.5163	54.126	0.348306	-1.33498	1	0.17375	0.999263	no	60S ribosomal protein L34 (RPL34A)
XLOC_023686	Prupe.7G241000	Pp07:20737304-20739888	G	F	OK	30.1764	38.4658	0.350155	-1.36479	1	0.17375	0.999263	no	SHS1 (SODIUM HYPERSENSITIVE 1); binding / nucleotide transmembrane transporter/ transporter
XLOC_009140	Prupe.3G011900	Pp03:741957-743213	G	F	OK	4.77295	6.4934	0.444095	-1.35607	1	0.1738	0.999263	no	calcium ion binding
XLOC_013102	Prupe.4G169900	Pp04:10034364-10036627	G	F	OK	11.8287	9.12681	-0.374111	1.37557	1	0.17385	0.999263	no	leucine-rich repeat transmembrane protein kinase, putative
XLOC_008922	Prupe.2G296800	Pp02:28733468-28734877	G	F	OK	33.992	43.766	0.364615	-1.3287	1	0.17395	0.999263	no	60S ribosomal protein L36 (RPL36B)
XLOC_002701	Prupe.1G519000	Pp01:42629595-42634236	G	F	OK	1.65388	2.6261	0.667066	-1.36184	1	0.17405	0.999263	no	unknown protein
XLOC_010904	Prupe.3G028500	Pp03:2123347-2152678	G	F	OK	9.37999	7.3976	-0.342529	1.33573	1	0.17415	0.999263	no	INVOLVED IN: protein localization; EXPRESSED IN: 22 plant structures; EXPRESSED DURING: 13 growth stages; CONTAINS InterPro DOMAIN/s: Vacuolar protein sorting-associated protein (InterPro:IPR009543); BEST Arabidopsis thaliana protein match is: phosphoinositide binding (TAIR:AT1G48090.2); Has 1782 Blast hits to 981 proteins in 148 species: Archae - 0; Bacteria - 0; Metazoa - 1018; Fungi - 290; Pla…
XLOC_014187	Prupe.4G092600	Pp04:4639053-4646631	G	F	OK	0.238181	0.138634	-0.78078	0.991705	1	0.1743	0.999263	no	NA
XLOC_001988	Prupe.1G383500	Pp01:34445219-34447363	G	F	OK	2.7533	3.75469	0.447535	-1.35188	1	0.1744	0.999263	no	unknown protein
XLOC_024059	Prupe.8G043900	Pp08:4534547-4537117	G	F	OK	3.2787	2.40352	-0.447975	1.35432	1	0.17455	0.999263	no	pentatricopeptide (PPR) repeat-containing protein
XLOC_014736	Prupe.4G213900	Pp04:13358519-13360286	G	F	OK	86.4152	109.252	0.338306	-1.31355	1	0.17465	0.999263	no	eukaryotic translation initiation factor SUI1, putative
XLOC_002541	Prupe.1G487700	Pp01:40626821-40629742	G	F	OK	2.73909	4.07782	0.574102	-1.30123	1	0.17475	0.999263	no	BTB/POZ domain-containing protein
XLOC_006036	Prupe.2G045000	Pp02:5037443-5038706	G	F	OK	1.83148	2.66955	0.54359	-1.36885	1	0.1749	0.999263	no	AtCXE17 (Arabidopsis thaliana carboxyesterase 17); hydrolase
XLOC_017416	Prupe.5G225400	Pp05:17419050-17422725	G	F	OK	2.61005	1.94894	-0.42139	1.30735	1	0.17495	0.999263	no	octicosapeptide/Phox/Bem1p (PB1) domain-containing protein
XLOC_021494	Prupe.7G062500	Pp07:10134664-10137630	G	F	OK	0.73508	0.489807	-0.585687	1.35794	1	0.17515	0.999263	no	disease resistance protein (NBS-LRR class), putative
XLOC_006585	Prupe.2G144900	Pp02:20174533-20182447	G	F	OK	1.0545	0.710907	-0.568832	1.32835	1	0.17535	0.999263	no	SEC1A (SIMILAR TO ELECTRON CAREER 1A); protein transporter
XLOC_009102	Prupe.3G004100	Pp03:271588-272612	G	F	OK	482.056	622.775	0.36951	-1.35401	1	0.1754	0.999263	no	CAB1 (CHLOROPHYLL A/B BINDING PROTEIN 1); chlorophyll binding
XLOC_024788	Prupe.8G185900,Prupe.8G186000	Pp08:18372058-18376195	G	F	OK	2.51519	1.78503	-0.494722	1.32817	1	0.1754	0.999263	no	NA
XLOC_024835	Prupe.8G196000	Pp08:18785806-18789102	G	F	OK	33.1242	42.2502	0.351075	-1.31344	1	0.1754	0.999263	no	oxidoreductase, zinc-binding dehydrogenase family protein
XLOC_000810	Prupe.1G149900	Pp01:11761461-11765720	G	F	OK	11.3885	14.7461	0.372751	-1.33014	1	0.17545	0.999263	no	RNR2A (RIBONUCLEOTIDE REDUCTASE 2A); ribonucleoside-diphosphate reductase
XLOC_004418	Prupe.1G285700	Pp01:28655505-28657837	G	F	OK	4.82194	3.59503	-0.423609	1.33328	1	0.17545	0.999263	no	pentatricopeptide (PPR) repeat-containing protein
XLOC_012260	Prupe.4G010300	Pp04:514054-515926	G	F	OK	22.3541	29.1612	0.383513	-1.35539	1	0.17545	0.999263	no	Rho GDP-dissociation inhibitor family protein
XLOC_020422	Prupe.6G216400	Pp06:22378882-22383095	G	F	OK	6.81674	5.1878	-0.393958	1.3306	1	0.1755	0.999263	no	ANT (AINTEGUMENTA); DNA binding / transcription factor
XLOC_023545	Prupe.7G212500	Pp07:19366869-19371515	G	F	OK	2.99085	2.23774	-0.418513	1.3319	1	0.1755	0.999263	no	protein kinase family protein
XLOC_000489	Prupe.1G085400	Pp01:6356152-6361348	G	F	OK	79.3166	62.3451	-0.347347	1.34468	1	0.17555	0.999263	no	ATR2 (ARABIDOPSIS P450 REDUCTASE 2); NADPH-hemoprotein reductase
XLOC_011110	Prupe.3G072900	Pp03:5242933-5244026	G	F	OK	9.29095	12.3427	0.409758	-1.32641	1	0.17565	0.999263	no	Predicted to encode a PR (pathogenesis-related) protein. Belongs to the plant thionin (PR-13) family with the following members: At1g66100, At5g36910, At1g72260, At2g15010, At1g12663, At1g12660.
XLOC_010991	Prupe.3G048300	Pp03:3405920-3409831	G	F	OK	4.10282	5.42955	0.404216	-1.31076	1	0.1757	0.999263	no	ATBFRUCT1; beta-fructofuranosidase/ hydrolase, hydrolyzing O-glycosyl compounds
XLOC_019779	Prupe.6G081600	Pp06:5523606-5526556	G	F	OK	5.07912	6.6075	0.379525	-1.35056	1	0.1757	0.999263	no	pentatricopeptide (PPR) repeat-containing protein
XLOC_003611	Prupe.1G122800	Pp01:9623356-9632236	G	F	OK	50.6619	40.0487	-0.339146	1.31546	1	0.176	0.999263	no	calmodulin-binding protein
XLOC_008110	Prupe.2G116500	Pp02:17469232-17472253	G	F	OK	97.44	123.855	0.346066	-1.34904	1	0.17605	0.999263	no	NA
XLOC_021391	Prupe.7G043200	Pp07:7942542-7944635	G	F	OK	10.482	8.08772	-0.374106	1.34855	1	0.1763	0.999263	no	glutaredoxin family protein
XLOC_016610	Prupe.5G057000	Pp05:6158370-6161139	G	F	OK	0.207901	0.101241	-1.0381	1.38773	1	0.17635	0.999263	no	NA
XLOC_004692	Prupe.1G347400	Pp01:32471825-32483066	G	F	OK	25.2442	19.9957	-0.336262	1.30763	1	0.1765	0.999263	no	HUA2 (ENHANCER OF AG-4 2); transcription factor
XLOC_018245	Prupe.6G143100	Pp06:11581290-11586673	G	F	OK	46.4942	36.6817	-0.34199	1.31305	1	0.17655	0.999263	no	CNGC1 (CYCLIC NUCLEOTIDE GATED CHANNEL 1); calmodulin binding / cation channel/ cyclic nucleotide binding / intracellular cyclic nucleotide activated cation channel/ inward rectifier potassium channel
XLOC_020525	Prupe.6G241000	Pp06:23982255-23983188	G	F	OK	1.16126	0.674405	-0.784003	1.36677	1	0.17655	0.999263	no	zinc finger protein-related
XLOC_022233	Prupe.7G202200	Pp07:18819266-18821268	G	F	OK	153.41	194.531	0.342604	-1.32903	1	0.17665	0.999263	no	ELF4-L4 (ELF4-Like 4)
XLOC_024251	Prupe.8G077900	Pp08:11223129-11224898	G	F	OK	13.822	18.4068	0.413269	-1.32368	1	0.1768	0.999263	no	emb2735 (embryo defective 2735)
XLOC_017653	Prupe.6G028700	Pp06:2235373-2238080	G	F	OK	27.0097	34.7187	0.362236	-1.32257	1	0.1769	0.999263	no	immunophilin / FKBP-type peptidyl-prolyl cis-trans isomerase family protein
XLOC_010893	Prupe.3G026800	Pp03:1982886-1988198	G	F	OK	1.90164	1.38049	-0.46207	1.35254	1	0.17705	0.999263	no	beta-amyrin synthase, putative
XLOC_008782	Prupe.2G265800	Pp02:27248909-27254283	G	F	OK	3.36456	2.58495	-0.38028	1.32402	1	0.1771	0.999263	no	unknown protein
XLOC_016887	Prupe.5G117400	Pp05:11893416-11895496	G	F	OK	3.47804	4.69508	0.432875	-1.32097	1	0.17715	0.999263	no	leucine-rich repeat transmembrane protein kinase, putative
XLOC_003618	Prupe.1G125400	Pp01:9882771-9887752	G	F	OK	3.09275	2.33377	-0.40623	1.31796	1	0.1773	0.999263	no	NA
XLOC_015066	Prupe.4G284000	Pp04:24581008-24585228	G	F	OK	0.746359	1.05304	0.496617	-1.32224	1	0.1773	0.999263	no	disease resistance protein (NBS-LRR class), putative
XLOC_016492	Prupe.5G031800	Pp05:3653836-3659420	G	F	OK	2.83548	3.70108	0.384351	-1.32368	1	0.1773	0.999263	no	inositol 1,3,4-trisphosphate 5/6-kinase
XLOC_022682	Prupe.7G021400	Pp07:3235333-3238215	G	F	OK	2.9618	3.93382	0.409458	-1.34652	1	0.1773	0.999263	no	NA
XLOC_022278	Prupe.7G210600	Pp07:19268481-19273625	G	F	OK	5.46891	4.14624	-0.399451	1.34199	1	0.1773	0.999263	no	NA
XLOC_010390	Prupe.3G250300	Pp03:24008716-24011127	G	F	OK	0.637212	0.388825	-0.712654	1.35161	1	0.17755	0.999263	no	IRX6
XLOC_020908	Prupe.6G317000	Pp06:28191589-28194201	G	F	OK	8.48223	11.1725	0.39744	-1.30181	1	0.17765	0.999263	no	MTSSB (mitochondrially targeted single-stranded DNA binding protein); single-stranded DNA binding
XLOC_026148	Prupe.8G192800	Pp08:18655074-18658655	G	F	OK	1.58795	1.09664	-0.53408	1.32418	1	0.1777	0.999263	no	proton-dependent oligopeptide transport (POT) family protein
XLOC_001218	Prupe.1G237900	Pp01:25267459-25268926	G	F	OK	0.48396	0.117998	-2.03613	1.50871	1	0.17775	0.999263	no	NA
XLOC_023625	Prupe.7G228700	Pp07:20174414-20175290	G	F	OK	0.257812	0.0635847	-2.01957	1.49643	1	0.17775	0.999263	no	unknown protein
XLOC_004329	Prupe.1G268900	Pp01:27616067-27620442	G	F	OK	71.7006	90.7421	0.339786	-1.33237	1	0.17785	0.999263	no	bZIP family transcription factor
XLOC_016787	Prupe.5G096400	Pp05:10552758-10553863	G	F	OK	11.6457	15.2966	0.39342	-1.35757	1	0.17785	0.999263	no	unknown protein
XLOC_020843	Prupe.6G303500	Pp06:27493212-27498216	G	F	OK	28.1552	22.147	-0.346288	1.35574	1	0.17785	0.999263	no	PIF3 (PHYTOCHROME INTERACTING FACTOR 3); DNA binding / protein binding / transcription factor/ transcription regulator
XLOC_006154	Prupe.2G062200	Pp02:8058218-8058885	G	F	OK	1.32403	2.29868	0.795871	-1.37245	1	0.1779	0.999263	no	FUNCTIONS IN: molecular_function unknown; INVOLVED IN: biological_process unknown; LOCATED IN: cellular_component unknown; CONTAINS InterPro DOMAIN/s: Pentatricopeptide repeat (InterPro:IPR002885); BEST Arabidopsis thaliana protein match is: pentatricopeptide (PPR) repeat-containing protein (TAIR:AT3G22470.1); Has 23967 Blast hits to 5877 proteins in 185 species: Archae - 3; Bacteria - 26; Metazo…
XLOC_008289	Prupe.2G157600	Pp02:21095616-21097789	G	F	OK	2.23064	1.56747	-0.509022	1.26749	1	0.17795	0.999263	no	NA
XLOC_009164	Prupe.3G016600	Pp03:1182100-1188143	G	F	OK	1.34584	0.955439	-0.494275	1.35034	1	0.17795	0.999263	no	NA
XLOC_009222	Prupe.3G030800	Pp03:2286249-2287101	G	F	OK	0.123095	0.500176	2.02266	-1.33397	1	0.17795	0.999263	no	NA
XLOC_000488	Prupe.1G084400	Pp01:6281601-6284742	G	F	OK	15.2787	19.6817	0.365328	-1.34461	1	0.178	0.999263	no	unknown protein
XLOC_001281	Prupe.1G249300	Pp01:26166798-26170043	G	F	OK	0.642701	0.957157	0.574608	-1.36537	1	0.1781	0.999263	no	protein kinase family protein
XLOC_014350	Prupe.4G124100	Pp04:6778955-6782494	G	F	OK	13.1874	17.0337	0.369233	-1.31264	1	0.17815	0.999263	no	NA
XLOC_006097	Prupe.2G053700	Pp02:6258788-6263801	G	F	OK	2.73877	2.06411	-0.408008	1.34586	1	0.1782	0.999263	no	disease resistance protein (NBS-LRR class), putative
XLOC_022571	Prupe.7G267700	Pp07:22059089-22060876	G	F	OK	55.9549	72.6917	0.377527	-1.34122	1	0.1782	0.999263	no	NA
XLOC_021441	Prupe.7G052600	Pp07:9083490-9093357	G	F	OK	13.9196	11.0125	-0.337974	1.31718	1	0.17825	0.999263	no	DNAJ heat shock N-terminal domain-containing protein
XLOC_018663	Prupe.6G227000	Pp06:23107694-23109774	G	F	OK	0.272201	0.484269	0.831136	-1.38647	1	0.1783	0.999263	no	CYP81D8; electron carrier/ heme binding / iron ion binding / monooxygenase/ oxygen binding
XLOC_016685	Prupe.5G074200	Pp05:8848536-8851595	G	F	OK	3.59931	2.71027	-0.409283	1.31633	1	0.17835	0.999263	no	WRKY21; calmodulin binding / transcription factor
XLOC_009535	Prupe.3G089200	Pp03:6614937-6618804	G	F	OK	0.414628	0.262023	-0.662125	1.36336	1	0.1784	0.999263	no	disease resistance protein (NBS-LRR class), putative
XLOC_024563	Prupe.8G139300	Pp08:15823138-15824147	G	F	OK	0.629867	1.1311	0.844602	-1.37809	1	0.17845	0.999263	no	VEP1 (VEIN PATTERNING 1); binding / catalytic
XLOC_023081	Prupe.7G110400	Pp07:13796725-13798702	G	F	OK	44.0415	56.4172	0.357272	-1.31679	1	0.1786	0.999263	no	ubiquinol-cytochrome C reductase UQCRX/QCR9-like family protein
XLOC_003341	Prupe.1G067500,Prupe.1G067600	Pp01:4817520-4824294	G	F	OK	3.08301	2.2528	-0.452623	1.30292	1	0.17865	0.999263	no	NA
XLOC_013647	Prupe.4G266600	Pp04:19922828-19923181	G	F	OK	6.10025	3.60194	-0.760094	1.36662	1	0.17865	0.999263	no	NA
XLOC_017754	Prupe.6G045300	Pp06:3287960-3291247	G	F	OK	10.5309	13.6068	0.3697	-1.29872	1	0.17865	0.999263	no	unknown protein
XLOC_017959	Prupe.6G089400	Pp06:6109488-6111237	G	F	OK	0.322736	0.166571	-0.95422	1.34632	1	0.1787	0.999263	no	NA
XLOC_020386	Prupe.6G208200	Pp06:21675596-21678583	G	F	OK	40.998	52.0111	0.343265	-1.33797	1	0.1787	0.999263	no	CAD6 (CINNAMYL ALCOHOL DEHYDROGENASE 6); binding / catalytic/ oxidoreductase/ zinc ion binding
XLOC_021849	Prupe.7G130600	Pp07:15015033-15016724	G	F	OK	0.335362	0.173048	-0.954547	1.34678	1	0.1787	0.999263	no	transferase family protein
XLOC_013582	Prupe.4G255100	Pp04:17693406-17697151	G	F	OK	4.0788	3.09581	-0.39783	1.33655	1	0.1788	0.999263	no	zinc finger (CCCH-type) family protein / RNA recognition motif (RRM)-containing protein
XLOC_017022	Prupe.5G146900	Pp05:13472268-13476146	G	F	OK	0.343897	0.603878	0.812282	-1.26325	1	0.1788	0.999263	no	FUNCTIONS IN: molecular_function unknown; INVOLVED IN: biological_process unknown; LOCATED IN: endomembrane system; BEST Arabidopsis thaliana protein match is: TPD1 (TAPETUM DETERMINANT 1) (TAIR:AT4G24972.1); Has 78 Blast hits to 76 proteins in 9 species: Archae - 0; Bacteria - 0; Metazoa - 0; Fungi - 0; Plants - 78; Viruses - 0; Other Eukaryotes - 0 (source: NCBI BLink).
XLOC_005301	Prupe.1G481500	Pp01:40195309-40198076	G	F	OK	24.2631	19.244	-0.334355	1.30526	1	0.17885	0.999263	no	epsin N-terminal homology (ENTH) domain-containing protein
XLOC_002615	Prupe.1G502700	Pp01:41577479-41579444	G	F	OK	0.841589	1.30079	0.628203	-1.34141	1	0.1789	0.999263	no	NA
XLOC_003171	Prupe.1G023600	Pp01:1659922-1662734	G	F	OK	0.982744	1.48562	0.596181	-1.31001	1	0.17905	0.999263	no	calmodulin, putative
XLOC_013072	Prupe.4G166000	Pp04:9631498-9632991	G	F	OK	0.163754	0.33256	1.02209	-1.36435	1	0.17905	0.999263	no	curculin-like (mannose-binding) lectin family protein
XLOC_017433	Prupe.5G228900	Pp05:17536850-17538984	G	F	OK	0.14735	0.299455	1.02309	-1.36569	1	0.17905	0.999263	no	NA
XLOC_009673	Prupe.3G114200	Pp03:9623545-9624577	G	F	OK	0.509553	0.254857	-0.999546	1.21678	1	0.17925	0.999263	no	NA
XLOC_000203	Prupe.1G036000	Pp01:2517371-2519762	G	F	OK	25.9941	33.0111	0.344766	-1.33294	1	0.1793	0.999263	no	NA
XLOC_011095	Prupe.3G069000	Pp03:4990804-4992109	G	F	OK	115.306	146.23	0.342769	-1.3402	1	0.1793	0.999263	no	60S ribosomal protein L37 (RPL37C)
XLOC_009007	Prupe.2G313900	Pp02:29553216-29558167	G	F	OK	27.5147	21.7292	-0.340569	1.33509	1	0.17935	0.999263	no	importin beta-2, putative
XLOC_018969	Prupe.6G286900	Pp06:26553168-26553908	G	F	OK	13.8862	10.3855	-0.419087	1.32035	1	0.17955	0.999263	no	FUNCTIONS IN: molecular_function unknown; INVOLVED IN: biological_process unknown; LOCATED IN: cellular_component unknown; EXPRESSED IN: 18 plant structures; EXPRESSED DURING: 9 growth stages; CONTAINS InterPro DOMAIN/s: Wound-induced protein, Wun1 (InterPro:IPR009798); BEST Arabidopsis thaliana protein match is: SAG20 (SENESCENCE ASSOCIATED GENE 20) (TAIR:AT3G10985.1); Has 49 Blast hits to 49 pr…
XLOC_007427	Prupe.2G303800	Pp02:29028497-29030451	G	F	OK	0.402571	0.668515	0.731717	-1.37395	1	0.17965	0.999263	no	ATVAMP726
XLOC_018629	Prupe.6G220300	Pp06:22604137-22607930	G	F	OK	1.09629	0.729177	-0.588292	1.32082	1	0.17965	0.999263	no	NA
XLOC_017758	Prupe.6G045900	Pp06:3319114-3337899	G	F	OK	33.5632	26.117	-0.361891	1.32012	1	0.1797	0.999263	no	binding / protein binding / zinc ion binding
XLOC_010845	Prupe.3G018200	Pp03:1296573-1299676	G	F	OK	6.57132	5.07532	-0.372686	1.33703	1	0.17975	0.999263	no	pentatricopeptide (PPR) repeat-containing protein
XLOC_003385	Prupe.1G077300	Pp01:5582418-5584712	G	F	OK	92.52	117.055	0.339347	-1.3056	1	0.1798	0.999263	no	unknown protein
XLOC_023342	Prupe.7G169800	Pp07:17214339-17218512	G	F	OK	5.08936	3.90442	-0.382375	1.30469	1	0.18	0.999263	no	OPT7 (OLIGOPEPTIDE TRANSPORTER 7); oligopeptide transporter
XLOC_018924	Prupe.6G278100	Pp06:26097708-26099126	G	F	OK	116.473	91.7264	-0.344582	1.35103	1	0.1801	0.999263	no	DNAJ heat shock protein, putative
XLOC_020790	Prupe.6G293900	Pp06:26987830-26992391	G	F	OK	2.44279	1.84543	-0.404576	1.30104	1	0.18025	0.999263	no	leucine-rich repeat transmembrane protein kinase, putative
XLOC_002862	Prupe.1G549500	Pp01:44916214-44919884	G	F	OK	3.21119	4.54023	0.499657	-1.32055	1	0.1803	0.999263	no	NA
XLOC_024670	Prupe.8G162100	Pp08:16989591-16991339	G	F	OK	13.6755	17.529	0.358149	-1.33318	1	0.1805	0.999263	no	disease resistance-responsive protein-related / dirigent protein-related
XLOC_003086	Prupe.1G005300	Pp01:465015-467015	G	F	OK	0.432585	0.733337	0.761492	-1.34728	1	0.18055	0.999263	no	NA
XLOC_023398	Prupe.7G180700	Pp07:17681972-17683859	G	F	OK	14.5253	11.2928	-0.363174	1.33682	1	0.1806	0.999263	no	PSAT; O-phospho-L-serine:2-oxoglutarate aminotransferase
XLOC_023710	Prupe.7G246900	Pp07:20988411-20990786	G	F	OK	6.04607	4.60723	-0.392098	1.3396	1	0.1806	0.999263	no	epsin N-terminal homology (ENTH) domain-containing protein
XLOC_007040	Prupe.2G230300	Pp02:25489511-25494335	G	F	OK	1.25161	0.907739	-0.463429	1.32762	1	0.18065	0.999263	no	2-oxoglutarate dehydrogenase E1 component, putative / oxoglutarate decarboxylase, putative / alpha-ketoglutaric dehydrogenase, putative
XLOC_003059	Prupe.1G588000	Pp01:47771595-47776497	G	F	OK	2.73257	1.96419	-0.476326	1.34726	1	0.1807	0.999263	no	MLO13 (MILDEW RESISTANCE LOCUS O 13); calmodulin binding
XLOC_018667	Prupe.6G227400	Pp06:23156715-23159755	G	F	OK	1.16757	1.70845	0.549177	-1.36581	1	0.1807	0.999263	no	CYP81D8; electron carrier/ heme binding / iron ion binding / monooxygenase/ oxygen binding
XLOC_015956	Prupe.5G164100	Pp05:14313214-14315432	G	F	OK	0.494491	0.289211	-0.773821	1.34902	1	0.18075	0.999263	no	CYP71A26; electron carrier/ heme binding / iron ion binding / monooxygenase/ oxygen binding
XLOC_001269	Prupe.1G246000	Pp01:25940316-25941014	G	F	OK	54.0213	68.8999	0.350973	-1.33271	1	0.1809	0.999263	no	NA
XLOC_011972	Prupe.3G262500	Pp03:24787820-24789898	G	F	OK	0.167076	0.354275	1.08437	-1.40579	1	0.18095	0.999263	no	unknown protein
XLOC_011290	Prupe.3G112300	Pp03:9382454-9383498	G	F	OK	0.216405	0.514121	1.24838	-1.40567	1	0.181	0.999263	no	ATBCB (ARABIDOPSIS BLUE-COPPER-BINDING PROTEIN); copper ion binding / electron carrier
XLOC_012611	Prupe.4G074700	Pp04:3663858-3664745	G	F	OK	0.19727	0.469256	1.2502	-1.40772	1	0.181	0.999263	no	NA
XLOC_015444	Prupe.5G065500	Pp05:7963397-7964781	G	F	OK	8.32867	11.0236	0.404432	-1.33184	1	0.181	0.999263	no	MYB4; DNA binding / transcription factor
XLOC_006424	Prupe.2G116600	Pp02:17473757-17476284	G	F	OK	8.88713	11.6968	0.396325	-1.34543	1	0.1811	0.999263	no	ferredoxin-related
XLOC_009831	Prupe.3G144100	Pp03:15634966-15636052	G	F	OK	0.402818	0.16792	-1.26236	1.43005	1	0.1811	0.999263	no	pathogenesis-related thaumatin family protein
XLOC_004713	Prupe.1G351500	Pp01:32692524-32702207	G	F	OK	2.97454	2.22939	-0.416016	1.30408	1	0.18125	0.999263	no	unknown protein
XLOC_026130	Prupe.8G190000	Pp08:18527056-18529122	G	F	OK	0.481594	0.853005	0.824735	-1.3758	1	0.18135	0.999263	no	transcription factor
XLOC_020751	Prupe.6G285400	Pp06:26481395-26482762	G	F	OK	4.02739	2.92917	-0.459353	1.31596	1	0.1818	0.999263	no	F-box protein-related / C-type lectin-related
XLOC_023859	Prupe.8G004500	Pp08:355707-367149	G	F	OK	0.599815	0	-Inf	NA	1	0.18185	0.999263	no	NA
XLOC_016682	Prupe.5G073700	Pp05:8785633-8794915	G	F	OK	11.1017	8.72929	-0.346847	1.29295	1	0.18215	0.999263	no	ORP2A (OSBP(OXYSTEROL BINDING PROTEIN)-RELATED PROTEIN 2A); oxysterol binding / phosphoinositide binding
XLOC_006981	Prupe.2G220400	Pp02:24887112-24889195	G	F	OK	0.380231	0.691289	0.862413	-1.37061	1	0.18225	0.999263	no	NA
XLOC_008257	Prupe.2G150900	Pp02:20580149-20583063	G	F	OK	20.5264	26.4669	0.366709	-1.33177	1	0.18235	0.999263	no	SAP18 (SIN3 ASSOCIATED POLYPEPTIDE P18); protein binding / transcription regulator
XLOC_010048	Prupe.3G189400	Pp03:20245287-20250328	G	F	OK	0.18785	0.330431	0.814769	-1.19833	1	0.18235	0.999263	no	ATP binding / protein kinase/ protein serine/threonine kinase
XLOC_009683	Prupe.3G116100	Pp03:9816864-9819450	G	F	OK	7.54907	5.82555	-0.373903	1.33323	1	0.1826	0.999263	no	NA
XLOC_008858	Prupe.2G281100	Pp02:27993994-27995894	G	F	OK	47.6473	60.4047	0.342266	-1.32334	1	0.18265	0.999263	no	40S ribosomal protein S20 (RPS20B)
XLOC_001711	Prupe.1G330200	Pp01:31311723-31313844	G	F	OK	47.6084	60.232	0.339312	-1.30619	1	0.1827	0.999263	no	NA
XLOC_008466	Prupe.2G199000	Pp02:23624994-23625754	G	F	OK	0.418733	0.981875	1.22951	-1.38442	1	0.183	0.999263	no	NA
XLOC_018599	Prupe.6G214100	Pp06:22196457-22203172	G	F	OK	24.7064	19.5958	-0.33434	1.30739	1	0.183	0.999263	no	LINC4 (LITTLE NUCLEI4)
XLOC_016907	Prupe.5G120300	Pp05:12020805-12022423	G	F	OK	36.8363	47.0921	0.354355	-1.30651	1	0.1831	0.999263	no	unknown protein
XLOC_009855	Prupe.3G149600	Pp03:16348249-16349023	G	F	OK	7.67533	5.54059	-0.470188	1.32563	1	0.18325	0.999263	no	NA
XLOC_002134	Prupe.1G409900	Pp01:35842406-35844823	G	F	OK	0.886014	0.57012	-0.636064	1.32433	1	0.18345	0.999263	no	IQD6 (IQ-domain 6); calmodulin binding
XLOC_015784	Prupe.5G130300	Pp05:12591803-12593842	G	F	OK	2.18768	2.9985	0.45484	-1.32495	1	0.1835	0.999263	no	basic helix-loop-helix (bHLH) family protein
XLOC_015984	Prupe.5G169500	Pp05:14547667-14549931	G	F	OK	54.2493	68.6595	0.339856	-1.32575	1	0.1835	0.999263	no	short-chain dehydrogenase/reductase (SDR) family protein
XLOC_021906	Prupe.7G140900	Pp07:15637801-15639226	G	F	OK	0.766016	1.21683	0.667685	-1.32427	1	0.1836	0.999263	no	MES10 (METHYL ESTERASE 10); hydrolase/ hydrolase, acting on ester bonds / methyl jasmonate esterase
XLOC_002820	Prupe.1G542400	Pp01:44313736-44317849	G	F	OK	21.6468	17.0708	-0.342621	1.33657	1	0.1837	0.999263	no	leucine-rich repeat transmembrane protein kinase, putative
XLOC_012421	Prupe.4G040000	Pp04:1884471-1886189	G	F	OK	1.87484	1.30311	-0.524806	1.33478	1	0.18385	0.999263	no	unknown protein
XLOC_023199	Prupe.7G136400	Pp07:15359214-15373497	G	F	OK	28.0021	22.1113	-0.340756	1.32816	1	0.18415	0.999263	no	nucleotide binding
XLOC_003817	Prupe.1G167300	Pp01:13597885-13602308	G	F	OK	81.181	102.688	0.339057	-1.30028	1	0.1842	0.999263	no	SBP2 (SELENIUM-BINDING PROTEIN 2); selenium binding
XLOC_022372	Prupe.7G229000	Pp07:20188686-20189901	G	F	OK	12.7668	16.5838	0.377377	-1.33242	1	0.1842	0.999263	no	MBF1C (MULTIPROTEIN BRIDGING FACTOR 1C); DNA binding / transcription coactivator/ transcription factor
XLOC_002705	Prupe.1G520400	Pp01:42705269-42708128	G	F	OK	3.35775	4.4087	0.392858	-1.27523	1	0.1843	0.999263	no	AtUGT85A2 (UDP-glucosyl transferase 85A2); UDP-glycosyltransferase/ glucuronosyltransferase/ transferase, transferring glycosyl groups
XLOC_003705	Prupe.1G145400	Pp01:11417989-11420022	G	F	OK	248.426	316.221	0.348115	-1.32197	1	0.1844	0.999263	no	AHP1 (HISTIDINE-CONTAINING PHOSPHOTRANSMITTER 1); histidine phosphotransfer kinase
XLOC_004957	Prupe.1G406000	Pp01:35675908-35676356	G	F	OK	2779.24	3626.6	0.383929	-1.34009	1	0.1846	0.999263	no	NA
XLOC_003091	Prupe.1G006000	Pp01:519182-520382	G	F	OK	0.617139	1.01037	0.711222	-1.32446	1	0.18475	0.999263	no	mitochondrial transcription termination factor family protein / mTERF family protein
XLOC_005829	Prupe.2G003400,Prupe.2G003500	Pp02:358732-381913	G	F	OK	62.427	49.1117	-0.346104	1.28807	1	0.18485	0.999263	no	NA
XLOC_017132	Prupe.5G169600	Pp05:14549939-14552868	G	F	OK	2.96641	2.14531	-0.467531	1.29665	1	0.18485	0.999263	no	FUNCTIONS IN: molecular_function unknown; INVOLVED IN: biological_process unknown; LOCATED IN: cellular_component unknown; EXPRESSED IN: 10 plant structures; EXPRESSED DURING: 4 anthesis, F mature embryo stage, petal differentiation and expansion stage, D bilateral stage, E expanded cotyledon stage; CONTAINS InterPro DOMAIN/s: Kinetochore-Ndc80 complex, subunit Spc25 (InterPro:IPR013255); Has 142…
XLOC_004871	Prupe.1G386700	Pp01:34627142-34631796	G	F	OK	14.1934	11.1545	-0.347585	1.28584	1	0.18495	0.999263	no	protein kinase family protein
XLOC_006209	Prupe.2G074300	Pp02:11235653-11240059	G	F	OK	0.572012	0.865062	0.596757	-1.30724	1	0.18505	0.999263	no	CYP71B7; electron carrier/ heme binding / iron ion binding / monooxygenase/ oxygen binding
XLOC_023111	Prupe.7G117200	Pp07:14204711-14208816	G	F	OK	4.38625	3.36084	-0.384166	1.29822	1	0.18515	0.999263	no	AT-HSFA3; DNA binding / transcription factor
XLOC_025113	Prupe.8G249400	Pp08:21517806-21520488	G	F	OK	29.8953	37.9473	0.344078	-1.28247	1	0.18535	0.999263	no	AHP2 (HISTIDINE-CONTAINING PHOSPHOTRANSMITTER 2); histidine phosphotransfer kinase/ protein binding / signal transducer
XLOC_009624	Prupe.3G104900	Pp03:8282566-8285759	G	F	OK	24.6731	31.7466	0.363662	-1.30551	1	0.18545	0.999263	no	PDF6 (PREFOLDIN 6); unfolded protein binding
XLOC_005766	Prupe.1G580100	Pp01:47180058-47181571	G	F	OK	0.982671	1.57631	0.681776	-1.31297	1	0.1857	0.999263	no	embryo-abundant protein-related
XLOC_002845	Prupe.1G546100	Pp01:44624927-44625849	G	F	OK	0.0803973	0.267915	1.73656	-1.45276	1	0.18585	0.999263	no	AP2 domain-containing transcription factor, putative
XLOC_010668	Prupe.3G302000	Pp03:26618186-26619286	G	F	OK	0.0883187	0.293952	1.73479	-1.45129	1	0.18585	0.999263	no	NA
XLOC_020880	Prupe.6G311300	Pp06:27896050-27897277	G	F	OK	0.154797	0.510014	1.72016	-1.43904	1	0.18585	0.999263	no	IMPA-4 (IMPORTIN ALPHA ISOFORM 4); binding / protein transporter
XLOC_025948	Prupe.8G153100	Pp08:16569217-16569703	G	F	OK	12.7339	17.408	0.451072	-1.30329	1	0.18585	0.999263	no	NA
XLOC_022408	Prupe.7G236600	Pp07:20529929-20533578	G	F	OK	121.706	154.218	0.34156	-1.28237	1	0.18595	0.999263	no	SOUL heme-binding family protein
XLOC_025755	Prupe.8G112900	Pp08:14146558-14147878	G	F	OK	417.872	536.62	0.360839	-1.32346	1	0.18595	0.999263	no	cytochrome b6f complex subunit (petM), putative
XLOC_017314	Prupe.5G205900	Pp05:16455271-16459517	G	F	OK	0.612711	0.963087	0.652458	-1.26722	1	0.1861	0.999263	no	AFP3 (ABI FIVE BINDING PROTEIN 3)
XLOC_012214	Prupe.3G314400	Pp03:27167231-27171008	G	F	OK	3.89581	2.94805	-0.402162	1.32489	1	0.18615	0.999263	no	zinc knuckle (CCHC-type) family protein
XLOC_019619	Prupe.6G052800	Pp06:3718290-3719468	G	F	OK	6.58754	8.70432	0.401991	-1.29921	1	0.18615	0.999263	no	NA
XLOC_026278	Prupe.8G220700	Pp08:20039319-20041241	G	F	OK	43.9827	55.8378	0.344306	-1.29801	1	0.1862	0.999263	no	60S ribosomal protein L14 (RPL14A)
XLOC_005572	Prupe.1G536300	Pp01:43822256-43826056	G	F	OK	35.218	44.7895	0.346845	-1.31016	1	0.18625	0.999263	no	NA
XLOC_018229	Prupe.6G139600	Pp06:11319933-11321466	G	F	OK	181.389	229.321	0.338283	-1.30988	1	0.18635	0.999263	no	unknown protein
XLOC_001544	Prupe.1G298500	Pp01:29418865-29422960	G	F	OK	24.9546	31.3596	0.329603	-1.27642	1	0.1864	0.999263	no	chaperonin, putative
XLOC_004785	Prupe.1G368000	Pp01:33663116-33669445	G	F	OK	92.682	73.0372	-0.343657	1.28295	1	0.18645	0.999263	no	unknown protein
XLOC_009529	Prupe.3G088600	Pp03:6583900-6586449	G	F	OK	1.11625	1.62597	0.542644	-1.28421	1	0.1865	0.999263	no	unknown protein
XLOC_007053	Prupe.2G233400	Pp02:25646282-25652738	G	F	OK	4.57279	4.46137	-0.035589	0.0160604	1	0.1866	0.999263	no	unknown protein
XLOC_010555	Prupe.3G281700	Pp03:25674241-25674764	G	F	OK	0.121534	0.598218	2.29931	-1.57024	1	0.1866	0.999263	no	NA
XLOC_004345	Prupe.1G271700	Pp01:27854745-27856083	G	F	OK	16.5911	12.7273	-0.382488	1.32224	1	0.18665	0.999263	no	KDR (KIDARI); transcription regulator
[truncated: 16,809 more rows]
